# Supplementary material
Source: publisher figshare collection journal article supplement (https://sage.figshare.com/ndownloader/files/14427524)
Supplement: Supplementary file 1 [file 14427524]

| **Supplementary file B: List of Excluded Full-Text-Studies with Reasons for Exclusions**  (exclusion codes are explained at the end of the table; note, occasionally several codes were registered but only one is reported here) | |
| --- | --- |
| References | Exclusion code |
| 1. Digest. (1998). *Adapted Physical Activity Quarterly, 15*(3), 285-289. | B4 |
| 1. Focus. Child health/education. (2004). *Australian Nursing Journal, 12*(2), 37. | B4 |
| 1. Illness Behavior & Somatization in Children. (1999). In. | B4 |
| 1. Pediatric migraine. (2004). *Headache: The Journal of Head & Face Pain, 44*(6), 627-628. | B4 |
| 1. 2008 SNRS abstracts -- D - E. (2008). *Southern Online Journal of Nursing Research, 8*(4), 4-4. | B4 |
| 1. Highlights of the December 4 issue. (2007). *Neurology, 69*(23), 2115-2115. | B4 |
| 1. Health-related quality of life in Austrian elementary school children. (2008). *Medical Care, 46*(4), 432-439. | B1 |
| 1. "Journal of Manipulative and Physiological Therapeutics": October 2008 Abstracts, Volume 31, Issue 8. (2008). *Dynamic Chiropractic, 26*(26), 3p. | B4 |
| 1. Selected abstracts from the 2007 AASCIPSW conference. (2008). *SCI Psychosocial Process, 21*(1), 47-54. | B4 |
| 1. Research abstracts from the Journal of Manipulative and Physiological Therapeutics Oct. 2009 Abstracts Volume 32, Issue 8. (2009). *Dynamic Chiropractic, 27*(25), 6p. | B4 |
| 1. Treatment of Recurrent Pain Syndromes in Children. (2000). In. | B4 |
| 1. Multiple-choice questions. (2012). *Continuum (Minneapolis, Minn.), 18*(4), 929-958. doi:10.1212/01.CON.0000418659.60041.db | B4 |
| 1. Abstracts. (2015). *Journal of Chinese Medicine*(107), 77-78. | B4 |
| 1. Abd El-Mageid, F. Y., Abou-El Fetouh, A. M., & Abou-Hatab, M. F. (2002). Recurrent abdominal pain among a sample of Egyptian children in relation to family and school related problems. *The Journal Of The Egyptian Public Health Association, 77*(1-2), 201-223. | B3 |
| 1. Abuarefeh, I., & Russell, G. (1994). PREVALENCE OF HEADACHE AND MIGRAINE IN SCHOOLCHILDREN. *British Medical Journal, 309*(6957), 765-769. | B1 |
| 1. Adam, V., St-Pierre, Y., Fautrel, B., Clarke, A. E., Duffy, C. M., & Penrod, J. R. (2005). What is the impact of adolescent arthritis and rheumatism? Evidence from a national sample of Canadians. *Journal of Rheumatology, 32*(2), 354-361. | A4 |
| 1. Adermann, J., & Campbell, M. (2007). Big Worry: Implications of Anxiety in Indigenous Youth. *Australian Journal of Indigenous Education, 36*, 74-80. | B1 |
| 1. Agoston, A. M., Gray, L. S., & Logan, D. E. (2016). Pain in School: Patterns of Pain-Related School Impairment among Adolescents with Primary Pain Conditions, Juvenile Idiopathic Arthritis Pain, and Pain-Free Peers. *Children (Basel, Switzerland), 3*(4). | B1 |
| 1. Agüero, G., Salmain, S., Manzur, B., & Berner, E. (2018). Pain in adolescents and its risk factors: A case-control study. *Archivos Argentinos De Pediatria, 116*(2), 112-118. doi:10.5546/aap.2018.eng.112 | B1 |
| 1. Akçamete, G., & Kargin, T. (1998). Bedensel engeli olan ve olmayan üniversite öğrencilerinin yaşam yönelimi düzeylerinin ıncelenmesi. = Examination of the life orientation levels of the physically-handicapped and non-handicapped college students. *Türk Psikoloji Dergisi, 13*(42), 37-46. | B5 |
| 1. Albieri, E., Visani, D., Ottolini, F., Vescovelli, F., & Ruini, C. (2011). [The use of Well-Being Therapy in childhood: clinical cases]. *Rivista Di Psichiatria, 46*(4), 265-272. doi:10.1708/931.10207 | B5 |
| 1. Alfven, G. (2003). One hundred cases of recurrent abdominal pain in children: diagnostic procedures and criteria for a psychosomatic diagnosis. *Acta Paediatr, 92*(1), 43-49. | B1 |
| 1. Allen, K. D., Mathews, J. R., & Shriver, M. D. (1999). Children and recurrent headaches: Assessment and treatment implications for school psychologists. *School Psychology Review, 28*(2), 266-279. | B2 |
| 1. Allen, S. S., Bland, C. J., Harris, I. B., Anderson, D., Poland, G., Satran, L., & Miller, W. (1991). Structured clinical teaching strategy. *Medical Teacher, 13*(2), 177-184. | A3 |
| 1. Allert, G., Gommel, M., Tamulionyté, L., Appelt, M., Zenz, H., & Kächele, H. (2002). [Interdisciplinary longitudinal curriculum "Medical psychology, psychotherapy and psychosomatics" (MPPP) at the University of Ulm]. *Psychotherapie, Psychosomatik, Medizinische Psychologie, 52*(8), 355-362. | A3 |
| 1. Ali, A., Weiss, T. R., Dutton, A., McKee, D., Jones, K. D., Kashikar-Zuck, S., . . . Shapiro, E. D. (2017). Mindfulness-Based Stress Reduction for Adolescents with Functional Somatic Syndromes: A Pilot Cohort Study. *J Pediatr, 183*, 184-190. doi:10.1016/j.jpeds.2016.12.053 | B1 |
| 1. Al-Tulaihi, B. A., & Al-Jumah, M. A. (2009). Prevalence of migraine and non-migraine headache among high school students at the National Guard Housing in Riyadh, Saudi Arabia. *Saudi Medical Journal, 30*(1), 120-124. | B1 |
| 1. Ameringer, S. (2009). Measuring pain in adolescents. *Journal of Pediatric Health Care, 23*(3), 201-204. doi:10.1016/j.pedhc.2009.01.006 | B1 |
| 1. Ammon, G., & Burbiel, I. (1992). BASIC TRAITS OF CLINICAL HUMAN STRUCTURAL PSYCHOTHERAPY. *Dynamische Psychiatrie, 25*(1-2), 1-22. | B1 |
| 1. Amouroux, R., Rousseau-Salvador, C., Pillant, M., Antonietti, J.-P., Tourniaire, B., & Annequin, D. (2017). Longitudinal study shows that depression in childhood is associated with a worse evolution of headaches in adolescence. *Acta Paediatrica (Oslo, Norway: 1992), 106*(12), 1961-1965. doi:10.1111/apa.13990 | B1 |
| 1. Anand, V., Zeft, A. S., & Spalding, S. J. (2017). Screening for Behavioral Risks: A Precision Healthcare Driven Approach for Chronic Pain Evaluation in Pediatric Specialty Care. *Stud Health Technol Inform, 245*, 275-279. | A3 |
| 1. Anthony, K. K., Gil, K. M., & Schanberg, L. E. (2003). Brief report: Parental perceptions of child vulnerability in children with chronic illness. *Journal of Pediatric Psychology, 28*(3), 185-190. doi:10.1093/jpepsy/jsg005 | A4 |
| 1. Antonaci, F., Voiticovschi-Iosob, C., Di Stefano, A. L., Galli, F., Ozge, A., & Balottin, U. (2014). The evolution of headache from childhood to adulthood: a review of the literature. *Journal of Headache & Pain, 15*(1), 1-11. doi:10.1186/1129-2377-15-15 | B2 |
| 1. Antshel, K. M., Brewster, S., & Waisbren, S. E. (2004). Child and parent attributions in chronic pediatric conditions: Phenylketonuria (PKU) as an exemplar. *Journal of Child Psychology and Psychiatry, 45*(3), 622-630. doi:10.1111/j.1469-7610.2004.00251.x | A3 |
| 1. Anttila, P., Metsähonkala, L., & Sillanpää, M. (1999). School start and occurrence of headache. *Pediatrics, 103*(6), e80-e80. | B1 |
| 1. Arabiat, D. H., Shaheen, A., Nassar, O., Saleh, M., & Mansour, A. (2018). Social and Health Determinants of Adolescents' Wellbeing in Jordan: Implications for Policy and Practice. *Journal of Pediatric Nursing, 39*, 55-60. doi:10.1016/j.pedn.2017.03.015 | B1 |
| 1. Arruda, M. A., Arruda, R., Guidetti, V., & Bigal, M. E. (2015). Psychosocial adjustment of children with migraine and tension‐type headache—A nationwide study. *Headache: The Journal of Head and Face Pain, 55*(Suppl 1), 39-50. doi:10.1111/head.12510 | B1 |
| 1. Arruda, M. A., Guidetti, V., Galli, F., Albuquerque, R. C. A. P., & Bigal, M. E. (2010). Migraine, tension-type headache, and attention-deficit/hyperactivity disorder in childhood: a population-based study. *Postgraduate Medicine, 122*(5), 18-26. doi:10.3810/pgm.2010.09.2197 | B1 |
| 1. Askew, R. L., Cook, K. F., Revicki, D. A., Cella, D., & Amtmann, D. (2016). Evidence from diverse clinical populations supported clinical validity of PROMIS pain interference and pain behavior. *J Clin Epidemiol, 73*, 103-111. doi:10.1016/j.jclinepi.2015.08.035 | A2 |
| 1. Assa, A., Ish-Tov, A., Rinawi, F., & Shamir, R. (2015). School Attendance in Children With Functional Abdominal Pain and Inflammatory Bowel Diseases. *Journal Of Pediatric Gastroenterology And Nutrition*. | B1 |
| 1. Assuncao, A., Carnide, F., Vieira, F., Silva, S., & Araujo, J. (2012). Effects of mismatched school furniture and morphological adolescent characteristics within different maturation levels on the prevalence of back pain. *Sho 2012: International Symposium on Occupational Safety and Hygiene*, 42-47. | B1 |
| 1. Attridge, N., Crombez, G., Van Ryckeghem, D., Keogh, E., & Eccleston, C. (2015). The Experience of Cognitive Intrusion of Pain: scale development and validation. *Pain, 156*(10), 1978-1990. doi:10.1097/j.pain.0000000000000257 | A2 |
| 1. Attridge, N., Keogh, E., & Eccleston, C. (2016). The effect of pain on task switching: pain reduces accuracy and increases reaction times across multiple switching paradigms. *Pain, 157*(10), 2179-2193. doi:10.1097/j.pain.0000000000000627 | A2 |
| 1. Ávila de Encío, M. C., & Polaino-Lorente, A. (1991). Adaptación del Classroom Observation Code en la población escolar para la evaluación de la hiperactividad infantil. = Adaptation of the Classroom Observation Code for evaluating hyperactivity in the school population. *Anuario de Psicología, 48*(1), 55-69. | B5 |
| 1. Aydin, M., Bozdag, S., & Kabakus, N. (2010). Headaches in Childhood. *Turkiye Klinikleri Tip Bilimleri Dergisi, 30*(6), 1928-1936. doi:10.5336/medsci.2009-13840 | B5 |
| 1. Aydin, M., Kabakus, N., Bozdag, S., & Ertugrul, S. (2010). Profile of children with migraine. *Indian Journal Of Pediatrics, 77*(11), 1247-1251. doi:10.1007/s12098-010-0210-2 | B3 |
| 1. Baczkiewicz, M., & Demczuk-Włodarczyk, E. (2011). [Validation of the questionnaire for adolescents concerning ailments of lumbosacral region. Part II: reliability of questions about risk factors]. *Przegla̧d Epidemiologiczny, 65*(1), 129-134. | B5 |
| 1. Bahrami, A., Sadeghnia, H., Avan, A., Mirmousavi, S. J., Moslem, A., Eslami, S., . . . Ghayour-Mobarhan, M. (2017). Neuropsychological function in relation to dysmenorrhea in adolescents. *European Journal Of Obstetrics, Gynecology, And Reproductive Biology, 215*, 224-229. doi:10.1016/j.ejogrb.2017.06.030 | B1 |
| 1. Bailet, L. L., & Turk, W. R. (2000). The impact of childhood epilepsy on neurocognitive and behavioral performance: a prospective longitudinal study. *Epilepsia, 41*(4), 426-431. | A4 |
| 1. Bailly, D., Bailly-Lambin, I., Querleu, D., Beuscart, R., & Collinet, C. (2004). Le sommeil des adolescents et ses troubles: Une enquete en milieu scolaire. = Sleep in adolescents and its disorders: A survey in schools. *L'Encéphale: Revue de psychiatrie clinique biologique et thérapeutique, 30*(4), 352-359. doi:10.1016/S0013-7006(04)95447-4 | B5 |
| 1. Baker, K. S., Gibson, S., Georgiou-Karistianis, N., Roth, R. M., & Giummarra, M. J. (2016). Everyday executive functioning in chronic pain: Specific deficits in working memory and emotion control, predicted by mood, medications, and pain interference. *The Clinical Journal Of Pain, 32*(8), 673-680. doi:10.1097/AJP.0000000000000313 | A2 |
| 1. Baker, K. S., Gibson, S. J., Georgiou‐Karistianis, N., & Giummarra, M. J. (2017). Relationship between self‐reported cognitive difficulties, objective neuropsychological test performance and psychological distress in chronic pain. *European Journal of Pain*. doi:10.1002/ejp.1151 | B1 |
| 1. Bakker, R. J., van de Putte, E. M., Kuis, W., & Sinnema, G. (2009). Risk factors for persistent fatigue with significant school absence in children and adolescents. *Pediatrics, 124*(1), e89-e95. doi:10.1542/peds.2008-1260 | B1 |
| 1. Balague, F., Troussier, B., & Salminen, J. J. (1999). Non-specific low back pain in children and adolescents: risk factors. *Eur Spine J, 8*(6), 429-438. | B2 |
| 1. Bandell-Hoekstra, I. E., Abu-Saad, H. H., Passchier, J., Frederiks, C. M., Feron, F. J., & Knipschild, P. (2001). Prevalence and characteristics of headache in Dutch schoolchildren. *Eur J Pain, 5*(2), 145-153. doi:10.1053/eujp.2001.0234 | B1 |
| 1. Bar-Dayan, Y., Arnson, Y., & Elishkevits, K. (2010). Screening for common neurologic diseases among Israeli adolescents. *Journal Of Child Neurology, 25*(3), 348-351. doi:10.1177/0883073809339878 | B1 |
| 1. Barkley, R. A., Fischer, M., Edelbrock, C. S., & Smallish, L. (1990). The adolescent outcome of hyperactive children diagnosed by research criteria: I. An 8-year prospective follow-up study. *Journal of the American Academy of Child & Adolescent Psychiatry, 29*(4), 546-557. doi:10.1097/00004583-199007000-00007 | A4 |
| 1. Barkoukis, V., Rodafinos, A., Koidou, E., & Tsorbatzoudis, H. (2012). Development of a scale measuring trait anxiety in physical education. *Measurement in Physical Education and Exercise Science, 16*(4), 237-253. doi:10.1080/1091367X.2012.716724 | B1 |
| 1. Batthyány, D., Müller, K. W., Benker, F., & Wölfling, K. (2009). [Computer game playing: clinical characteristics of dependence and abuse among adolescents]. *Wiener Klinische Wochenschrift, 121*(15-16), 502-509. doi:10.1007/s00508-009-1198-3 | B5 |
| 1. Bazanova, O. M., Balioz, N. V., Muravleva, K. B., & Skoraia, M. V. (2013). [Voluntary alpha-power increasing training impact on the heart rate variability]. *Fiziologiia Cheloveka, 39*(1), 103-116. | B5 |
| 1. Bazas, T., Krikella, A., Zorba, K., & Kapsali, K. (2013). Photo competition as a tool for providing occupational health education to general secondary school students. *Journal Of Occupational Health, 55*(6), 516-519. | B1 |
| 1. Beales, D. J., Smith, A. J., O'Sullivan, P. B., & Straker, L. M. (2012). Low Back Pain and Comorbidity Clusters at 17 Years of Age: A Cross-sectional Examination of Health-Related Quality of Life and Specific Low Back Pain Impacts. *Journal of Adolescent Health, 50*(5), 509-516. doi:10.1016/j.jadohealth.2011.09.017 | B1 |
| 1. Becker, C. M., Adams, T., Orr, C., & Quilter, L. (2008). Correlates of Quality Sleep and Academic Performance. *Health Educator, 40*(2), 82-89. | B1 |
| 1. Beckman, L., Stenbeck, M., & Hagquist, C. (2016). Disability in Relation to Different Peer-Victimization Groups and Psychosomatic Problems. *Children & Schools, 38*(3), 153-161. | B1 |
| 1. Beiser, M., Goodwill, A. M., Albanese, P., McShane, K., & Nowakowski, M. (2014). Predictors of immigrant children's mental health in Canada: selection, settlement contingencies, culture, or all of the above? *Social Psychiatry And Psychiatric Epidemiology, 49*(5), 743-756. doi:10.1007/s00127-013-0794-8 | B1 |
| 1. Bejia, I., Abid, N., Ben Salem, K., Letaief, M., Younes, M., Touzi, M., & Bergaoui, N. (2005). Low back pain in a cohort of 622 Tunisian schoolchildren and adolescents: an epidemiological study. *European Spine Journal: Official Publication Of The European Spine Society, The European Spinal Deformity Society, And The European Section Of The Cervical Spine Research Society, 14*(4), 331-336. | B1 |
| 1. Bell, W. E. (1996). Headaches of recent onset and long-term learning disability. *Seminars In Pediatric Neurology, 3*(3), 226-230. | B2 |
| 1. Bellis, M. A., Hughes, K., Ford, K., Hardcastle, K. A., Sharp, C. A., Wood, S., . . . Davies, A. (2018). Adverse childhood experiences and sources of childhood resilience: a retrospective study of their combined relationships with child health and educational attendance. *BMC Public Health, 18*(1), 792-792. doi:10.1186/s12889-018-5699-8 | B1 |
| 1. Ben-David, A., & Erez-Darvish, T. (1997). The Effect of the Family on the Emotional Life of Ethiopian Immigrant Adolescents in Boarding Schools in Israel. *Residential Treatment for Children & Youth, 15*(2), 39-50. | B1 |
| 1. Bendixen, M., Muus, K. M., & Schei, B. (1994). The impact of child sexual abuse--a study of a random sample of Norwegian students. *Child Abuse Negl, 18*(10), 837-847. | A2 |
| 1. Bener, A., Swadi, H., Qassimi, E. M. A., & Uduman, S. (1998). Prevalence of headache and migraine in schoolchildren in the United Arab Emirates. *Annals of Saudi Medicine, 18*(6), 522-524. | B1 |
| 1. Bénony, H., Van Der Elst, D., Chahraoui, K., Bénony, C., & Marnier, J. P. (2007). [Link between depression and academic self-esteem in gifted children]. *L'encéphale, 33*(1), 11-20. | B1 |
| 1. Bergh, D., Hagquist, C., & Starrin, B. (2011). Social relations in school and psychosomatic health among Swedish adolescents—the role of academic orientation. *European Journal of Public Health, 21*(6), 699-704. doi:10.1093/eurpub/ckq140 | B1 |
| 1. Bernstein, G. A., & Massie, E. D. Somatic symptoms in anxious-depressed school refusers. *Journal of the American Academy of Child & Adolescent Psychiatry, 36*(5), 661. | B1 |
| 1. Bessisso, M. S., Bener, A., Elsaid, M. F., Al-Khalaf, F. A., & Huzaima, K. A. (2005). Pattern of headache in school children in the State of Qatar. *Saudi Medical Journal, 26*(4), 566-570. | B1 |
| 1. Bethell, C., Kemper, K. J., Gombojav, N., & Koch, T. K. (2013). Complementary and conventional medicine use among youth with recurrent headaches. *Pediatrics, 132*(5), e1173-e1183. doi:10.1542/peds.2013-1816 | B1 |
| 1. Bhandari, R. P., Feinstein, A. B., Huestis, S. E., Krane, E. J., Dunn, A. L., Cohen, L. L., . . . Mackey, S. C. (2016). Pediatric-Collaborative Health Outcomes Information Registry (Peds-CHOIR): a learning health system to guide pediatric pain research and treatment. *Pain, 157*(9), 2033-2044. doi:10.1097/j.pain.0000000000000609 | B1 |
| 1. Bille, B. (1997). A 40-year follow-up of school children with migraine. *Cephalalgia (Wiley-Blackwell), 17*(4), 488-491. doi:10.1046/j.1468-2982.1997.1704488.x | B1 |
| 1. Blanco-Lago, R., Garcia-Ron, A., Granizo-Martinez, J. J., & Ruibal, J. L. (2014). Current situation of the demand for health care in neuropaediatrics. Characteristics of consultations and comparison with other paediatric specialties. *Revista De Neurologia, 59*(9), 392-398. | B5 |
| 1. Bloomfield, T. (2009). Understanding the needs of migraineurs in schools. *British Journal of School Nursing, 4*(10), 475-476. | B4 |
| 1. Bodas, J., Ollendick, T. H., & Sovani, A. V. (2008). Test anxiety in Indian children: a cross-cultural perspective. *Anxiety, Stress, And Coping, 21*(4), 387-404. doi:10.1080/10615800701849902 | B1 |
| 1. Boekaerts, M., & Röder, I. (1999). Stress, coping, and adjustment in children with a chronic disease: A review of the literature. *Disability and Rehabilitation: An International, Multidisciplinary Journal, 21*(7), 311-337. doi:10.1080/096382899297576 | B2 |
| 1. Boey, C. C. M., Yap, S. B., & Goh, K. L. (2000). The prevalence of recurrent abdominal pain in 11-to 16-year-old Malaysian schoolchildren. *Journal of Paediatrics and Child Health, 36*(2), 114-116. doi:10.1046/j.1440-1754.2000.00465.x | B1 |
| 1. Bomba, J., Modrzejewska, R., & Beauvale, A. (2011). Struktura czynnikowa objawów w Krakowskim Inwentarzu Depresyjnym KID IO „B1' w grupie 15-latków. = Factor structure of symptoms in the Krakow Depression Inventory KID IO 'B1' among 15-year-olds. *Psychiatria Polska, 45*(2), 245-259. | B5 |
| 1. Boone, K. B. (2009). image omitted Fixed Belief in Cognitive Dysfunction Despite Normal Neuropsychological Scores: Neurocognitive Hypochondriasis? *Clinical Neuropsychologist, 23*(6), 1016-1036. doi:10.1080/13854040802441135 | A2 |
| 1. Boone, K. B., & Lu, P. H. (1999). Impact of somatoform symptomatology on credibility of cognitive performance. *The Clinical Neuropsychologist, 13*(4), 414-419. | A4 |
| 1. Brandibas, G., Jeunier, B., & Stilhart, C. (2007). Harcèlement entre élèves. Conséquences somatiques et psychologiques. = Somatic and psychological consequences of bullying between pupils. *Revue Francophone du Stress et du Trauma, 7*(3), 143-151. | B5 |
| 1. Breau, L. M., McGrath, P. J., Camfield, C., Rosmus, C., & Finley, G. A. (2000). Preliminary validation of an observational pain checklist for persons with cognitive impairments and inability to communicate verbally. *Developmental Medicine & Child Neurology, 42*(9), 609-616. doi:10.1017/S0012162200001146 | A4 |
| 1. Breau, L. M., & Zabalia, M. (2006). Évaluer la douleur des enfants atteints de déficience intellectuelle. = Assessing pain in children with cognitive impairment. *Enfance, 58*(1), 72-84. doi:10.3917/enf.581.0072 | B5 |
| 1. Bremner, A. R., & Sandhu, B. K. (2009). Recurrent abdominal pain in childhood: the functional element. *Indian Pediatrics, 46*(5), 375-379. | B1 |
| 1. Brett, B. L., Solomon, G. S., Hill, J., & Schatz, P. (2018). Two-year Test-Retest Reliability in High School Athletes Using the Four- and Two-Factor ImPACT Composite Structures: The Effects of Learning Disorders and Headache/Migraine Treatment History. *Archives Of Clinical Neuropsychology: The Official Journal Of The National Academy Of Neuropsychologists, 33*(2), 216-226. doi:10.1093/arclin/acx059 | B1 |
| 1. Brett, T., Rowland, M., & Drumm, B. (2012). An approach to functional abdominal pain in children and adolescents. *The British Journal Of General Practice: The Journal Of The Royal College Of General Practitioners, 62*(600), 386-387. doi:10.3399/bjgp12X652562 | B1 |
| 1. Breuner, C. C., Smith, M. S., & Womack, W. M. (2004). Factors related to school absenteeism in adolescents with recurrent headache. *Headache: The Journal of Head & Face Pain, 44*(3), 217-222. | B1 |
| 1. Brna, P., Dooley, J., Gordon, K., & Dewan, T. (2005). The prognosis of childhood headache - A 20-year follow-up. *Archives of Pediatrics & Adolescent Medicine, 159*(12), 1157-1160. doi:10.1001/archpedi.159.12.1157 | B1 |
| 1. Brodke, D. S., Goz, V., Lawrence, B. D., Spiker, W. R., Neese, A., & Hung, M. (2017). Oswestry Disability Index: a psychometric analysis with 1,610 patients. *Spine J, 17*(3), 321-327. doi:10.1016/j.spinee.2016.09.020 | A2 |
| 1. Bromet, E. J., Goldgaber, D., Carlson, G., Panina, N., Golovakha, E., Gluzman, S. F., . . . Schwartz, J. E. (2000). Children's well-being 11 years after the Chornobyl catastrophe. *Archives Of General Psychiatry, 57*(6), 563-571. | B1 |
| 1. Brown, R. T. (2006). *Managing pediatric pain at school*. | B4 |
| 1. Bruce, B. K., Ale, C. M., Harrison, T. E., Bee, S., Luedtke, C., Geske, J., & Weiss, K. E. (2017). Getting Back to Living: Further Evidence for the Efficacy of an Interdisciplinary Pediatric Pain Treatment Program. *Clinical Journal of Pain, 33*(6), 535-542. doi:10.1097/AJP.0000000000000433 | B3 |
| 1. Buch, N. A., Ahmad, S. M., Ahmed, S. Z., Ali, S. W., Charoo, B. A., & Hassan, M. U. (2002). Recurrent abdominal pain in children. *Indian Pediatrics, 39*(9), 830-834. | B1 |
| 1. Buddeberg-Fischer, B., Klaghofer, R., Reed, V., & Buddeberg, C. (2000). [Psychosomatic health promotion in adolescents. An intervention study in 2 high schools]. *Gesundheitswesen (Bundesverband Der Ärzte Des Öffentlichen Gesundheitsdienstes (Germany)), 62*(10), 499-504. | B5 |
| 1. Bujoreanu, S., Randall, E., Thomson, K., & Ibeziako, P. (2014). Characteristics of medically hospitalized pediatric patients with somatoform diagnoses. *Hospital Pediatrics, 4*(5), 283-290. doi:10.1542/hpeds.2014-0023 | B3 |
| 1. Burn, D., Markham, R., Lipscombe, S., & Abu-Arafeh, I. (2013). Me and my migraine: impact survey for children and young people... The European Headache and Migraine Trust International Congress, London, UK, 20-23 September 2012. *Journal of Headache & Pain, 14*, 1-1. doi:10.1186/1129-2377-14-S1-P31 | B4 |
| 1. Burton, A. K., Balague, F., Cardon, G., Eriksen, H. R., Henrotin, Y., Lahad, A., . . . Pr, C. B. W. G. G. (2006). Chapter 2 - European guidelines for prevention in low back pain. *European Spine Journal, 15*, S136-S168. doi:10.1007/s00586-006-1070-3 | B2 |
| 1. Calandre, E. P., Bembibre, J., Arnedo, M. L., & Becerra, D. (2002). Cognitive disturbances and regional cerebral blood flow abnormalities in migraine patients: their relationship with the clinical manifestations of the illness. *Cephalalgia, 22*(4), 291-302. | B1 |
| 1. Calitz, I. J. W., Veitch, M., Verkhovsky, A., Nieuwoudt, D., Myburg, J., & Joubert, G. (2007). The general profile of children and adolescents with major depression referred to the Free State Psychiatric Complex. *South African Journal of Psychiatry, 13*(4), 132-136. | B1 |
| 1. Camerini, G. B. (1996). Disprassie e apprendimento matematico: le difficolta6 figurative. = Dyspraxia and learning mathematics: figurative difficulties. *Saggi: Neuropsicologia Infantile Psicopedagogia Riabilitazione, 22*(1), 45-55. | B5 |
| 1. Campo, J. V., Comer, D. M., Jansen-McWilliams, L., & Kelleher, K. J. (1999). Somatization in pediatric primary care: Association with psychopathology, functional impairment, and use of services. *Journal of the American Academy of Child & Adolescent Psychiatry, 38*(9), 1093-1101. | B1 |
| 1. Carlsson, J. (1996). Prevalence of headache in schoolchildren: relation to family and school factors. *Acta Paediatr, 85*(6), 692-696. | B1 |
| 1. Carlsson, J., Larsson, B., & Mark, A. (1996). Psychosocial functioning in schoolchildren with recurrent headaches. *Headache, 36*(2), 77-82. | B1 |
| 1. Caro, X. J., & Winter, E. F. (2011). EEG biofeedback treatment improves certain attention and somatic symptoms in fibromyalgia: A pilot study. *Applied Psychophysiology and Biofeedback, 36*(3), 193-200. doi:10.1007/s10484-011-9159-9 | B1 |
| 1. Carpino, E., Segal, S., Logan, D., Lebel, A., & Simons, L. E. (2014). The interplay of pain-related self-efficacy and fear on functional outcomes among youth with headache. *Journal of Pain, 15*(5), 527-534. doi:10.1016/j.jpain.2014.01.493 | B1 |
| 1. Carter, B. D., Kronenberger, W. G., Cruce-Spurling, S., Threlkeld, B. M., Brady, C. E., Jones, L. C., & Mizell, D. (2015). Factors associated with dropout versus completion of a manualized treatment for pediatric chronic pain. *Clinical Practice in Pediatric Psychology, 3*(4), 327-339. doi:10.1037/cpp0000119    1. 10.1037/cpp0000119.supp (Supplemental) | B1 |
| 1. Casucci, G., Terlizzi, R., & Cevoli, S. (2014). Headache in school age. *Neurological Sciences: Official Journal Of The Italian Neurological Society And Of The Italian Society Of Clinical Neurophysiology, 35 Suppl 1*, 31-35. doi:10.1007/s10072-014-1738-0 | B2 |
| 1. Cebrian, J., & Sanchez, P. (2009). [Pediatric complex regional pain syndrome affecting an upper limb: 7 cases and a brief review of the literature]. *Rev Esp Anestesiol Reanim, 56*(3), 163-169. | B5 |
| 1. Cedraschi, C., Reust, P., Lorenzi-Cioldi, F., & Vischer, T. L. (1996). The gap between back pain patients' prior knowledge and scientific knowledge and its evolution after a back school teaching programme: a quantitative evaluation. *Patient Education And Counseling, 27*(3), 235-246. | B1 |
| 1. Čeko, M., Gracely, J. L., Fitzcharles, M.-A., Seminowicz, D. A., Schweinhardt, P., & Bushnell, M. C. (2015). Is a responsive default mode network required for successful working memory task performance? *The Journal of Neuroscience, 35*(33), 11595-11605. doi:10.1523/JNEUROSCI.0264-15.2015 | A2 |
| 1. Cesur, R., Sabia, J. J., & Tekin, E. (2015). Combat exposure and migraine headache: Evidence from exogenous deployment assignment. *Economics & Human Biology, 16*, 81-99. doi:10.1016/j.ehb.2014.01.001 | A3 |
| 1. Çetin, S. K., Yektaş, Ç., Bildik, T., Dalkılıç, M., & Tamar, M. (2014). Ergenlerde cinsel kimlik ve yönelim sorunlarinda değerlendirme ve izlem: Dört kiz olgu. = Evaluation and follow-up of gender identity and sexual orientation problems in adolescents: Four female cases. *Çocuk ve Gençlik Ruh Sağliği Dergisi, 21*(1), 51-64. | B5 |
| 1. Chalkiadis, G. A. (2001). Management of chronic pain in children. *The Medical Journal Of Australia, 175*(9), 476-479. | B1 |
| 1. Chao, W., & Kolski-Andreaco, A. (2014). June 2014: This Month in JoVE-3D Virtual Navigation in the Human Brain, Simulation of Planet Formation, and Bioprinting Cultured Cartilage Grafts. *Jove-Journal of Visualized Experiments*(88). doi:10.3791/5407 | B4 |
| 1. Charman, T. (2007). Editorial. *Journal of Child Psychology and Psychiatry, 48*(1), 1-2. doi:10.1111/j.1469-7610.2006.01719.x | B4 |
| 1. Chau, K., Karavdic, S., Baumann, M., & Chau, N. (2014). INDIVIDUAL DIFFERENCES IN LEARNING DIFFICULTY. *Inpact 2014: International Psychological Applications Conference and Trends*, 302-304. | B1 |
| 1. Chen, X., Origasa, H., Ichida, F., Kamibeppu, K., & Varni, J. W. (2007). Reliability and validity of the Pediatric Quality of Life InventoryTM (PedsQLTM) Short Form 15 Generic Core Scales in Japan. *Quality of Life Research: An International Journal of Quality of Life Aspects of Treatment, Care & Rehabilitation, 16*(7), 1239-1249. doi:10.1007/s11136-007-9230-4 | B1 |
| 1. Chen, Y. C. (2014). Exploration of the Short-Term and Long-Term Effects of Parental Illness on Children's Educational and Behavioral Functioning Using a Large Taiwanese Sample. *Western Journal of Nursing Research, 36*(5), 664-684. doi:10.1177/0193945913509899 | B1 |
| 1. Cheng, H., Green, A., Chapman, B. P., Treglown, L., & Furnham, A. (2017). Educational achievement and traits emotional stability and agreeableness as predictors of the occurrence of backache in adulthood. *Personality and Individual Differences, 117*, 205-209. doi:10.1016/j.paid.2017.06.008 | B1 |
| 1. Chiwaridzo, M., & Naidoo, N. (2016). Functional consequences and health-care seeking behaviour for recurrent non-specific low back pain in Zimbabwean adolescents: a cross-sectional study. *Eur Spine J, 25*(2), 643-650. doi:10.1007/s00586-015-4105-9 | B1 |
| 1. Choquet, M., & Ledoux, S. (1991). FUNCTIONAL AND DEPRESSIVE SYMPTOMS AS HEALTH INDICATORS AMONG ADOLESCENTS. *Archives Francaises De Pediatrie, 48*(2), 99-105. | B5 |
| 1. Christiansen, S., Jurgens, T. P., & Klinger, R. (2015). Outpatient Combined Group and Individual Cognitive-Behavioral Treatment for Patients With Migraine and Tension-Type Headache in a Routine Clinical Setting. *Headache, 55*(8), 1072-1091. doi:10.1111/head.12626 | A2 |
| 1. Claar, R. L., Kaczynski, K. J., Minster, A., McDonald-Nolan, L., & LeBel, A. A. (2013). School functioning and chronic tension headaches in adolescents: improvement only after multidisciplinary evaluation. *Journal Of Child Neurology, 28*(6), 719-724. doi:10.1177/0883073812450945 | B1 |
| 1. Claar, R. L., Walker, L. S., & Smith, C. A. (1999). Functional disability in adolescents and young adults with symptoms of irritable bowel syndrome: the role of academic, social, and athletic competence. *Journal Of Pediatric Psychology, 24*(3), 271-280. | B1 |
| 1. Clark, E. M., Tobias, J. H., & Fairbank, J. (2016). The Impact of Small Spinal Curves in Adolescents Who Have Not Presented to Secondary Care: A Population-Based Cohort Study. *Spine (Phila Pa 1976), 41*(10), E611-617. doi:10.1097/brs.0000000000001330 | B1 |
| 1. Cockshell, S. J., & Mathias, J. L. (2013). Cognitive deficits in chronic fatigue syndrome and their relationship to psychological status, symptomatology, and everyday functioning. *Neuropsychology, 27*(2), 230-242. doi:10.1037/a0032084 | A2 |
| 1. Coenen, P., Smith, A., Paananen, M., O'Sullivan, P., Beales, D., & Straker, L. (2017). Trajectories of Low Back Pain From Adolescence to Young Adulthood. *Arthritis Care Res (Hoboken), 69*(3), 403-412. doi:10.1002/acr.22949 | A3 |
| 1. Cohen, L. L., Vowles, K. E., & Eccleston, C. (2010). The impact of adolescent chronic pain on functioning: disentangling the complex role of anxiety. *Journal of Pain, 11*(11), 1039-1046. doi:10.1016/j.jpain.2009.09.009 | B1 |
| 1. Cole, E., & Brown, R. S. (2002). Psychological needs of post-war children in Kosovo: A preliminary analysis. *School Psychology International, 23*(2), 131-147. doi:10.1177/0143034302023002912 | A3 |
| 1. Collier, A., Munger, M., & Moua, Y. (2012). Hmong Mental Health Needs Assessment: A Community-Based Partnership in a Small Mid-Western Community. *American Journal of Community Psychology, 49*(1/2), 73-86. doi:10.1007/s10464-011-9436-z | A2 |
| 1. Cordeiro, P., Paixão, P., Lens, W., Lacante, M., & Sheldon, K. (2016). Factor structure and dimensionality of the balanced measure of psychological needs among portuguese high school students. Relations to well-being and ill-being. *Learning and Individual Differences, 47*, 51-60. doi:10.1016/j.lindif.2015.12.010 | B1 |
| 1. Cortina, M. A., Stein, A., Kahn, K., Hlungwani, T. M., Holmes, E. A., & Fazel, M. (2016). Cognitive styles and psychological functioning in rural South African school students: Understanding influences for risk and resilience in the face of chronic adversity. *Journal of Adolescence, 49*, 38-46. doi:10.1016/j.adolescence.2016.01.010 | B1 |
| 1. Costa-Silva, M. A., Prado, A. C. d. A., de Souza, L. C., Gomez, R. S., & Teixeira, A. L. (2016). Cognitive functioning in adolescents with migraine. *Dementia & Neuropsychologia, 10*(1), 47-51. doi:10.1590/S1980-57642016DN10100009 | B1 |
| 1. Coyle, B. (1995). Use of filters to treat visual-perception problem creates adherents and sceptics. *CMAJ: Canadian Medical Association Journal = Journal De L'association Medicale Canadienne, 152*(5), 749-750. | A3 |
| 1. Crabtree, E. (2011). Educational implications of Meares-Irlen syndrome. *British Journal of School Nursing, 6*(4), 182-187. | A4 |
| 1. Crisp, J., Ungerer, J. A., & Goodnow, J. J. (1996). The impact of experience on children's understanding of illness. *Journal of Pediatric Psychology, 21*(1), 57-72. doi:10.1093/jpepsy/21.1.57 | B1 |
| 1. Cromer, b., McLean, C. S., & Heald, F. P. (1992). A critical review of comprehensive health screening in adolescents: Psychosocial screening. *Journal of Adolescent Health, 13*(2, Suppl), 52-57. doi:10.1016/1054-139X(92)90341-8 | B4 |
| 1. Crushell, E., Rowland, M., Doherty, M., Gormally, S., Harty, S., Bourke, B., & Drumm, B. (2003). Importance of parental conceptual model of illness in severe recurrent abdominal pain. *Pediatrics, 112*(6), 1368-1372. | B1 |
| 1. Danno, K., Colas, A., Masson, J. L., & Bordet, M. F. (2013). Homeopathic treatment of migraine in children: results of a prospective, multicenter, observational study. *J Altern Complement Med, 19*(2), 119-123. doi:10.1089/acm.2011.0821 | B1 |
| 1. Daud, K. M. (2013). Challenges in recognising significant back pain in a child with learning difficulties. *Archives of Disease in Childhood, 98*(9), 697-697. doi:10.1136/archdischild-2013-304097 | B4 |
| 1. Davies, E. (2007). Research: a review of a selection of recently published clinical papers. *Practice Nurse, 33*(10), 38-38. | B4 |
| 1. Davis, C., Tang, C., & Ko, J. (2002). Assessing the impact of social factors on the mental health of Chinese at risk adolescents in Hong Kong. *British Journal of Social Work, 32*(5), 609-619. doi:10.1093/bjsw/32.5.609 | B1 |
| 1. de Anda, D., Bradley, M., Collada, C., Dunn, L., Kubota, J., Hollister, V., . . . Wadsworth, T. (1997). A Study of Stress, Stressors, and Coping Strategies among Middle School Adolescents. *Social Work in Education, 19*(2), 87-98. | B1 |
| 1. de Blécourt, A. C. E., Schiphorst Preuper, H. R., Van Der Schans, C. P., Groothoff, J. W., & Reneman, M. F. (2008). Preliminary evaluation of a multidisciplinary pain management program for children and adolescents with chronic musculoskeletal pain. *Disability And Rehabilitation, 30*(1), 13-20. | B1 |
| 1. e Bruin, E. J., Dewald-Kaufmann, J. F., Oort, F. J., Bögels, S. M., & Meijer, A. M. (2015). Differential effects of online insomnia treatment on executive functions in adolescents. *Sleep Medicine, 16*(4), 510-520. doi:10.1016/j.sleep.2014.12.009 | A3 |
| 1. de Graaf, J., van Lingen, R. A., Valkenburg, A. J., Weisglas-Kuperus, N., Jebbink, L. G., Wijnberg-Williams, B., . . . van Dijk, M. (2013). Does neonatal morphine use affect neuropsychological outcomes at 8 to 9 years of age? *Pain, 154*(3), 449-458. doi:10.1016/j.pain.2012.12.006 | A3 |
| 1. Dear, B. F., Gandy, M., Karin, E., Staples, L. G., Johnston, L., Fogliati, V. J., . . . Titov, N. (2015). The Pain Course: a randomised controlled trial examining an internet-delivered pain management program when provided with different levels of clinician support. *Pain, 156*(10), 1920-1935. doi:10.1097/j.pain.0000000000000251 | A2 |
| 1. Deci, E. L., & Ryan, R. M. (2000). The "What" and "Why" of Goal Pursuits: Human Needs and the Self-Determination of Behavior. *Psychological Inquiry, 11*(4), 227-268. doi:10.1207/S15327965PLI1104_01 | A1 |
| 1. Deighton, R. M., & Traue, H. C. (2005). Emotional inhibition and somatization across cultures. = L'inhibition émotionnelle et la somatisation: Une étude comparative interculturelle. *Revue Internationale de Psychologie Sociale, 18*(1-2), 109-140. | B5 |
| 1. Dellisch, H. (1991). Krankmachende Angst in der Familie. = Illness-causing anxiety within the family. *Praxis Der Kinderpsychologie Und Kinderpsychiatrie, 40*(4), 128-133. | B5 |
| 1. Descheemaeker, M. J., Ghesquière, P., Symons, H., Fryns, J. P., & Legius, E. (2005). Behavioural, academic and neuropsychological profile of normally gifted Neurofibromatosis type 1 children. *Journal of Intellectual Disability Research, 49*(1), 33-46. doi:10.1111/j.1365-2788.2005.00660.x | A4 |
| 1. Diamond, S. (1999). Tension-type headache. *Clinical Cornerstone, 1*(6), 33-44. | B1 |
| 1. Díaz-Atienza, F., Santiago, J., Navarro, E. M., & Gurpegui, M. (1999). Morbilidad psiquiátrica asociada a enuresis infantil. = Psychiatric morbidity associated with enuresis in children. *Actas Españolas de Psiquiatría, 27*(6), 384-389. | B5 |
| 1. Dick, B. D., & Pillai Riddell, R. (2010). Cognitive school functioning in children and adolescents with chronic pain: A critical review. *Pain Research & Management, 15*(4), 238-244. | B2 |
| 1. Dionne, C. E., Von Korff, M., Koepsell, T. D., Deyo, R. A., Barlow, W. E., & Checkoway, H. (2001). Formal education and back pain: a review. *Journal of Epidemiology & Community Health, 55*(7), 455-468. | B1 |
| 1. DiPalma, A. M., & DiPalma, J. A. (1997). Recurrent abdominal pain and lactose maldigestion in school-aged children... including commentary by Shields N and Kidwell JA. *Gastroenterology Nursing, 20*(5), 180. | B4 |
| 1. Dolphens, M., Vansteelandt, S., Cagnie, B., Vleeming, A., Nijs, J., Vanderstraeten, G., & Danneels, L. (2016). Multivariable modeling of factors associated with spinal pain in young adolescence. *Eur Spine J, 25*(9), 2809-2821. doi:10.1007/s00586-016-4629-7 | B1 |
| 1. Doman, L. C. H., & Roux, A. (2010). The causes of loneliness and the factors that contribute towards it - a literature review. *Tydskrif Vir Geesteswetenskappe, 50*(2), 216-228. | B5 |
| 1. Dong, Z., Chen, X., Steiner, T. J., Hou, L., Di, H., He, M., . . . Yu, S. (2015). Medication-overuse headache in China: Clinical profile, and an evaluation of the ICHD-3 beta diagnostic criteria. *Cephalalgia, 35*(8), 644-651. doi:10.1177/0333102414552533 | A2 |
| 1. Dos Reis-Neto, E. T., Ferraz, M. B., Kowalski, S. C., Pinheiro Gda, R., & Sato, E. I. (2016). Prevalence of musculoskeletal symptoms in the five urban regions of Brazil-the Brazilian COPCORD study (BRAZCO). *Clin Rheumatol, 35*(5), 1217-1223. doi:10.1007/s10067-015-2963-5 | A2 |
| 1. Durá Travé, T., & Yoldi Petri, M. E. (2005). [Acute recurrent headaches: clinical and epidemiological characteristics]. *Anales De Pediatría (Barcelona, Spain: 2003), 62*(2), 141-146. | B5 |
| 1. Duranović, V., Bosnjak, V. M., Lujić, L., & Krakar, G. (2008). [Diagnostic procedures in pediatric migraine]. *Acta Medica Croatica: C̆asopis Hravatske Akademije Medicinskih Znanosti, 62*(2), 241-245. | B5 |
| 1. Durkin, M. S., Hasan, Z. M., & Hasan, K. Z. (1995). The Ten Questions Screen for childhood disabilities: Its uses and limitations in Pakistan. *Journal of Epidemiology and Community Health, 49*(4), 431-436. doi:10.1136/jech.49.4.431 | B1 |
| 1. Dyb, G., Stensland, S., & Zwart, J.-A. (2015). Psychiatric comorbidity in childhood and adolescence headache. *Current Pain And Headache Reports, 19*(3), 5-5. doi:10.1007/s11916-015-0479-y | B2 |
| 1. Eccleston, C., Crombez, G., Scotford, A., Clinch, J., & Connell, H. (2004). Adolescent chronic pain: patterns and predictors of emotional distress in adolescents with chronic pain and their parents. *Pain, 108*(3), 221-229. doi:10.1016/j.pain.2003.11.008 | B1 |
| 1. Eccleston, C., Malleson, P. N., Clinch, J., Connell, H., & Sourbut, C. (2003). Chronic pain in adolescents: evaluation of a programme of interdisciplinary cognitive behaviour therapy. *Archives of Disease in Childhood, 88*(10), 881-885. | B3 |
| 1. Egilson, S. T., & Traustadottir, R. (2009). Participation of students with physical disabilities in the school environment. *American Journal of Occupational Therapy, 63*(3), 264-272. doi:10.5014/ajot.63.3.264 | A4 |
| 1. Eimecke, S., Pauschardt, J., Remschmidt, H., Walter, R., & Mattejat, F. (2011). Time Trends in Psychopathology. A 21-year comparison from Germany. *Zeitschrift Für Kinder- Und Jugendpsychiatrie Und Psychotherapie, 39*(3), 187-194. doi:10.1024/1422-4917/a000092 | B1 |
| 1. Eksioglu, M. (2017). Musculoskeletal and visual symptoms among undergraduate students: Individual and computer-use-related risk factors and interference with academic performance. *International Journal of Industrial Ergonomics, 60*, 26-34. doi:10.1016/j.ergon.2015.11.011 | A2 |
| 1. Elbing, U., Hölzer, M., Danner-Weinberger, A., & von Wietersheim, J. (2009). Reliabilität und validität des instruments 'DoKuPro—Dokumentation Kunsttherapeutischer Prozesse': Erste ergebnisse. = Reliability and validity of the instrument 'DoKuPro—Dokumentation Kunsttherapeuticsher Prozesse' (art therapy process documentation): Preliminary results. *Musik-, Tanz- und Kunsttherapie, 20*(1), 1-7. doi:10.1026/0933-6885.20.1.1 | B5 |
| 1. Eliacik, K., Kanik, A., Bolat, N., Mertek, H., Guven, B., Karadas, U., . . . Bakiler, A. R. (2017). Anxiety, depression, suicidal ideation, and stressful life events in non-cardiac adolescent chest pain: a comparative study about the hidden part of the iceberg. *Cardiology in the Young, 27*(6), 1098-1103. doi:10.1017/s1047951116002109 | B1 |
| 1. Elovainio, M., Pietikainen, M., Luopa, P., Kivimaki, M., Ferrie, J. E., Jokela, J., . . . Virtanen, M. (2011). Organizational justice at school and its associations with pupils' psychosocial school environment, health, and wellbeing. *Soc Sci Med, 73*(12), 1675-1682. doi:10.1016/j.socscimed.2011.09.025 | B1 |
| 1. Engh, L., Janson, S., Svensson, B., Bornehag, C.-G., & Eriksson, U.-B. (2017). Swedish population-based study of pupils showed that foster children faced increased risks for ill health, negative lifestyles and school failure. *Acta Paediatrica (Oslo, Norway: 1992), 106*(10), 1635-1641. doi:10.1111/apa.13966 | B1 |
| 1. Erez, D. L., Levy, J., Friger, M., Aharoni-Mayer, Y., Cohen-Iluz, M., & Goldstein, E. (2010). Assessment of cognitive and adaptive behaviour among individuals with congenital insensitivity to pain and anhidrosis. *Developmental Medicine & Child Neurology, 52*(6), 559-562. doi:10.1111/j.1469-8749.2009.03567.x | A3 |
| 1. Erginoz, E., Alikasifoglu, M., Ercan, O., Uysal, O., Ercan, G., Albayrak Kaymak, D., & Ilter, O. (2004). Perceived health status in a Turkish adolescent sample: risk and protective factors. *European Journal Of Pediatrics, 163*(8), 485-494. | B1 |
| 1. Esposito, M., Pascotto, A., Gallai, B., Parisi, L., Roccella, M., Marotta, R., . . . Carotenuto, M. (2012). Can headache impair intellectual abilities in children? An observational study. *Neuropsychiatric Disease And Treatment, 8*. | B1 |
| 1. Esposito, M., Ruberto, M., Gimigliano, F., Marotta, R., Gallai, B., Parisi, L., . . . Carotenuto, M. (2013). Effectiveness and safety of Nintendo Wii Fit Plus™ training in children with migraine without aura: a preliminary study. *Neuropsychiatric Disease And Treatment, 9*, 1803-1810. doi:10.2147/NDT.S53853 | B1 |
| 1. Eusebio, M. Á. S., & Hernández, D. G. (2005). Inadaptación y autopercepción de tristeza en niños y adolescentes. = Maladjustment and self-perception of sadness in children and adolescents. *Revista de Psicología General y Aplicada, 58*(4), 425-451. | B5 |
| 1. Evans, S., Taub, R., Ci Tsao, J., Meldrum, M., & Zeltzer, L. K. (2010). Sociodemographic factors in a pediatric chronic pain clinic: The roles of age, sex and minority status in pain and health characteristics. *Journal of Pain Management, 3*(3), 273-281. | B1 |
| 1. Ezeala-Adikaibe, B., Onyekonwu, C., Ijoma, U., Ekenze, O., Okpara, T., Okafor, H., . . . Ezeala-Adikaibe, P. (2017). Primary Headache Among Secondary School Children: Prevalence, Pattern and Other Characteristics in Enugu, South East Nigeria. *Journal of Neurological Sciences-Turkish, 34*(1), 86-95. | B3 |
| 1. Faith, M. A., Reed, G., Heppner, C. E., Hamill, L. C., Tarkenton, T. R., & Donewar, C. W. (2015). Bullying in medically fragile youth: a review of risks, protective factors, and recommendations for medical providers. *Journal Of Developmental And Behavioral Pediatrics: JDBP, 36*(4), 285-301. doi:10.1097/DBP.0000000000000155 | A3 |
| 1. Fanurik, D., Koh, J. L., Schmitz, M. L., Harrison, R. D., & Conrad, T. M. (1999). Children with cognitive impairment: Parent report of pain and coping. *Journal of Developmental and Behavioral Pediatrics, 20*(4), 228-234. doi:10.1097/00004703-199908000-00004 | B1 |
| 1. Fasullo, S. (2009). Dal carattere alessitimico al disturbo psicosomatico. = From alexithymic character to psychosomatic disorder. *Psichiatria e Psicoterapia, 28*(4), 281-295. | B5 |
| 1. Fehr, T. G. (1996). Therapeutische relevante Effekte durch transzendentale Meditation? = Does transcendental meditation have therapeutically relevant effects? *PPmP: Psychotherapie Psychosomatik Medizinische Psychologie, 46*(5), 179-188. | B5 |
| 1. Ferracini, G. N., Dach, F., & Speciali, J. G. (2014). Quality of life and health‐related disability in children with migraine. *Headache: The Journal of Head and Face Pain, 54*(2), 325-334. doi:10.1111/head.12251 | B1 |
| 1. Ferrari, A., Pileri, F., Spaccapelo, L., Zappaterra, M., Ruggerini, C., Tacchi, R., & Bertolini, A. (2009). How children and parents evaluate the Headache Centre's intervention. *Headache, 49*(2), 194-201. doi:10.1111/j.1526-4610.2008.01325.x | B3 |
| 1. Ferreira, K. D. S., Oliver, G. Z., Thomaz, D. C., Teixeira, C. T., & Foss, M. P. (2016). Cognitive deficits in chronic pain patients, in a brief screening test, are independent of comorbidities and medication use. *Arquivos De Neuro-Psiquiatria, 74*(5), 361-366. doi:10.1590/0004-282X20160071 | A2 |
| 1. Fillat, N. (1999). Sobre la depressió en el nen. = Depression in children. *Revista Catalana de Psicoanàlisi, 16*(1), 63-74. | B5 |
| 1. Fletcher, K. E., Stern, D. T., White, C., Gruppen, L. D., Oh, M. S., & Cimmino, V. M. (2004). The physical examination of patients with abdominal pain: the long-term effect of adding standardized patients and small-group feedback to a lecture presentation. *Teaching And Learning In Medicine, 16*(2), 171-174. | A2 |
| 1. Fontaine, R., & Reveillere, C. (2004). Bullying at school: description, vulnerability and psychopathological repercussions. *Annales Medico-Psychologiques, 162*(7), 588-594. doi:10.1016/j.amp.2004.06.009 | B5 |
| 1. Fontenelle, L. (2001). [Neurology in adolescence]. *Jornal De Pediatria, 77 Suppl 2*, S205-S216. | B5 |
| 1. Forns Serrallonga, M. D., & Raich Escursell, R. M. (1994). Síntomas de ansiedad en alumnos de EGB. = Anxiety symptoms among school-children in ordinary primary schools. *Revista de Psiquiatría Infanto-Juvenil, 2*, 87-95. | B5 |
| 1. Freeman, J., King, M., Kuntsche, E., & Pickett, W. (2011). Protective roles of home and school environments for the health of young Canadians. *Journal Of Epidemiology And Community Health, 65*(5), 438-444. doi:10.1136/jech.2008.086819 | B1 |
| 1. Freeman, J. G., Samdal, O., Baban, A., & Bancila, D. (2012). The Relationship Between School Perceptions and Psychosomatic Complaints: Cross-Country Differences Across Canada, Norway, and Romania. *School Mental Health, 4*(2), 95-104. doi:10.1007/s12310-011-9070-9 | B1 |
| 1. Freeman, J. G., Samdal, O., Klinger, D. A., Dur, W., Griebler, R., Currie, D., & Rasmussen, M. (2009). The relationship of schools to emotional health and bullying. *International Journal of Public Health, 54*, 251-259. doi:10.1007/s00038-009-5421-9 | B1 |
| 1. Fremont, W. P. (2003). School refusal in children and adolescents. *American Family Physician, 68*(8), 1555. | B1 |
| 1. Frisk, M. (1999). A complex background in children and adolescents with psychiatric disorders: Developmental delay, dyslexia, heredity, slow cognitive processing and adverse social factors in a multifactorial entirety. *European Child & Adolescent Psychiatry, 8*(3), 225-236. | B1 |
| 1. Fritzsche, K., Engemann, B., & Wirsching, M. (2008). [Curriculum psychosomatic medicine and psychotherapy in medical education--concept, implementation, evaluation]. *Psychotherapie, Psychosomatik, Medizinische Psychologie, 58*(8), 321-325. doi:10.1055/s-2007-986353 | B5 |
| 1. Fujita, M., Fujiwara, J., Maki, T., Shibasaki, K., Shigeta, M., & Nii, J. (2009). Pediatric chronic daily headache associated with school phobia. *Pediatrics International, 51*(5), 621-625. doi:10.1111/j.1442-200X.2009.02804.x | B1 |
| 1. Fung, H. W., Choi, T. M., Chan, C., & Ross, C. A. (2018). Psychometric properties of the pathological dissociation measures among Chinese - a pilot study using online methods. *Journal of Evidence-Informed Social Work, 15*(4), 371-384. doi:10.1080/23761407.2018.1456995 | A2 |
| 1. Gadin, K. G., & Hammarstrom, A. (2003). Do changes in the psychosocial school environment influence pupils' health development? Results from a three-year follow-up study. *Scandinavian Journal of Public Health, 31*(3), 169-177. doi:10.1080/14034940210134121 | B1 |
| 1. Gale, C. R., Deary, I. J., Cooper, C., & Batty, G. D. (2012). Intelligence in childhood and chronic widespread pain in middle age: the National Child Development Survey. *Pain, 153*(12), 2339-2344. doi:10.1016/j.pain.2012.07.027 | A2 |
| 1. Galli, F., Canzano, L., Scalisi, T. G., & Guidetti, V. (2009). Psychiatric disorders and headache familial recurrence: a study on 200 children and their parents. *J Headache Pain, 10*(3), 187-197. doi:10.1007/s10194-009-0105-7 | B1 |
| 1. Garaigordobil, M. (2011). Prevalencia y consecuencias del cyberbullying: Una revisión. = Prevalence and consequences of cyberbullying: A review. *International Journal of Psychology & Psychological Therapy, 11*(2), 233-254. | B5 |
| 1. Garaizar, C., Prats, J. M., & Zuazo, E. (1998). Results of prophylactic treatment for common childhood headaches. *Revista De Neurologia, 26*(151), 380-385. | B5 |
| 1. García Siso, A., Tárrega, B., González, J. L., & Arrufat, J. (1998). La enuresis en el centro de Salud Mental Infanto–Juvenil: Síntoma y síndrome. = Enuresis in a mental health center of childhood and adolescent: Symptom and syndrome. *Revista de Psiquiatría Infanto-Juvenil, 2*, 94-106. | B5 |
| 1. García-Campayo, J. J., Bonals Pi, A., Sanz-Carrillo, C., & Marco Sanjuan, C. (1993). Comprensión familiar de la depresión infantil a través de la CDS. = Family understanding of child depression by the use of the CDS. *Revista de Psiquiatría Infanto-Juvenil, 1*, 24-28. | B5 |
| 1. Gardner, A. (2007). *Back pain in school children - Will they be fit for work?* | B4 |
| 1. Gartstein, M. A., Noll, R. B., & Vannatta, K. (2000). Childhood aggression and chronic illness: Possible protective mechanisms. *Journal of Applied Developmental Psychology, 21*(3), 315-333. doi:10.1016/S0193-3973(00)00043-5 | B1 |
| 1. Gassmann, J., Barke, A., van Gessel, H., & Kroner-Herwig, B. (2012). Sex-specific predictor analyses for the incidence of recurrent headaches in German schoolchildren. *Psychosoc Med, 9*, Doc03. doi:10.3205/psm000081 | B1 |
| 1. Gastal Fassa, A., Facchini, L. A., Mór Dall'Agnol, M., & Christiani, D. C. (2005). Child labor and musculoskeletal disorders: the Pelotas (Brazil) Epidemiological Survey. *Public Health Reports, 120*(6), 664-673. | B1 |
| 1. Gauntlett-Gilbert, J., & Eccleston, C. (2007). Disability in adolescents with chronic pain: Patterns and predictors across different domains of functioning. *Pain, 131*(1-2), 132-141. | B1 |
| 1. Genizi, J., Gordon, S., Kerem, N. C., Srugo, I., Shahar, E., & Ravid, S. (2013). Primary headaches, attention deficit disorder and learning disabilities in children and adolescents. *The Journal Of Headache And Pain, 14*, 54-54. doi:10.1186/1129-2377-14-54 | B3 |
| 1. Genizi, J., Khourieh Matar, A., Schertz, M., Zelnik, N., & Srugo, I. (2016). Pediatric mixed headache -The relationship between migraine, tension-type headache and learning disabilities - in a clinic-based sample. *Journal of Headache & Pain, 17*(1), 1-4. doi:10.1186/s10194-016-0625-x | B1 |
| 1. Genizi, J., Srugo, I., & Kerem, N. C. (2013). The cross- ethnic variations in the prevalence of headache and other somatic complaints among adolescents in Northern Israel. *The Journal Of Headache And Pain, 14*, 21-21. doi:10.1186/1129-2377-14-21 | B1 |
| 1. Ghuman, P. A. S. Asian girls in secondary schools: a British perspective. *Intercultural Education, 12*(2), 197-207. doi:10.1080/14675980120064836 | B1 |
| 1. Gil-Gouveia, R., Oliveira, A. G., & Pavao Martins, I. (2016). Clinical Utility of the Mig-SCog. *Headache, 56*(6), 941-951. doi:10.1111/head.12806 | A2 |
| 1. Giannetti, L. M., Iuliano, M., & Balsamo, M. (2001). Fobia per la scuola: Terapia con citalopram. = School phobia: Therapy with citalopram. *Giornale di Neuropsicofarmacologia, 23*(2), 45-48. | B5 |
| 1. Gidding, S. S. (2011). The challenge of communicating cardiovascular risk information to our patients. *The Journal Of Pediatrics, 158*(4), 527-528. doi:10.1016/j.jpeds.2010.11.031 | B1 |
| 1. Gilbert, M. C. (1995). Coping with Pediatric Migraine: Differences Between Copers and Non-copers. *Child & Adolescent Social Work Journal, 12*(4), 275-287. | A3 |
| 1. Gil-Gouveia, R., Oliveira, A. G., & Martins, I. P. (2011). A subjective cognitive impairment scale for migraine attacks. The MIG-SCOG: development and validation. *Cephalalgia: An International Journal Of Headache, 31*(9), 984-991. doi:10.1177/0333102411408359 | A3 |
| 1. Giota, J., & Gustafsson, J. E. (2017). Perceived Demands of Schooling, Stress and Mental Health: Changes from Grade 6 to Grade 9 as a Function of Gender and Cognitive Ability. *Stress & Health: Journal of the International Society for the Investigation of Stress, 33*(3), 253-266. doi:10.1002/smi.2693 | B1 |
| 1. Giovannini, S., Haffner, J., Parzer, P., Steen, R., Klett, M., & Resch, F. (2005). Verhaltensauffälligkeiten bei Erstklässlern aus Sicht der Eltern und der Lehrerinnen. = Parent- and teacher-reported behavior problems of first graders. *Praxis Der Kinderpsychologie Und Kinderpsychiatrie, 54*(2), 104-125. | B5 |
| 1. Gledhill, J., & Garralda, M. E. (2006). Functional Symptoms and Somatoform Disorders in Children and Adolescents: The Role of Standardised Measures in Assessment. *Child and Adolescent Mental Health, 11*(4), 208-214. doi:10.1111/j.1475-3588.2006.00392.x | B1 |
| 1. Gold, J. I., Mahrer, N. E., Yee, J., & Palermo, T. M. (2009). Pain, fatigue, and health-related quality of life in children and adolescents with chronic pain. *Clinical Journal of Pain, 25*(5), 407-412. doi:10.1097/AJP.0b013e318192bfb1 | B1 |
| 1. Gold, J. I., Yetwin, A. K., Mahrer, N. E., Carson, M. C., Griffin, A. T., Palmer, S. N., & Joseph, M. H. (2009). Pediatric chronic pain and health-related quality of life. *Journal of Pediatric Nursing, 24*(2), 141-150. doi:10.1016/j.pedn.2008.07.003 | B1 |
| 1. Gonzalez, A., Boyle, M. H., Kyu, H. H., Georgiades, K., Duncan, L., & MacMillan, H. L. (2012). Childhood and family influences on depression, chronic physical conditions, and their comorbidity: findings from the Ontario Child Health Study. *Journal Of Psychiatric Research, 46*(11), 1475-1482. doi:10.1016/j.jpsychires.2012.08.004 | B1 |
| 1. Gonzalez-Valcarcel Espinosa, M., Alonso Garcia, L., Branas Fernandez, P., & Pedreira Massa, J. L. (2008). [Hospital admissions in adolescents with psychosomatic illnesses]. *An Pediatr (Barc), 69*(2), 115-118. | B5 |
| 1. Gorodzinsky, A. Y., Hainsworth, K. R., & Weisman, S. J. (2011). School functioning and chronic pain: a review of methods and measures. *Journal Of Pediatric Psychology, 36*(9), 991-1002. doi:10.1093/jpepsy/jsr038 | B2 |
| 1. Gortmaker, S. L., Perrin, J. M., Weitzman, M., Homer, C. J., & Sobol, A. M. (1993). An unexpected success story: Transition to adulthood in youth with chronic physical health conditions. *Journal of Research on Adolescence, 3*(3), 317-336. doi:10.1207/s15327795jra0303_6 | B1 |
| 1. Goubert, L., Eccleston, C., Vervoort, T., Jordan, A., & Crombez, G. (2006). Parental catastrophizing about their child's pain. The parent version of the Pain Catastrophizing Scale (PCS-P): a preliminary validation. *Pain, 123*(3), 254-263. | B1 |
| 1. Greco, L. A., Baer, R. A., & Smith, G. T. (2011). Assessing Mindfulness in Children and Adolescents: Development and Validation of the Child and Adolescent Mindfulness Measure (CAMM). *Psychological Assessment, 23*(3), 606-614. doi:10.1037/a0022819 | B1 |
| 1. Greco, L. A., Freeman, K. E., & Dufton, L. (2007). Overt and relational victimization among children with frequent abdominal pain: links to social skills, academic functioning, and health service use. *Journal Of Pediatric Psychology, 32*(3), 319-329. | B1 |
| 1. Gulewitsch, M. D., Rosenkranz, T., Barkmann, C., & Schlarb, A. A. (2015). Measuring somatic complaints in primary school children: Validation and revision of the German Children’s Somatization Inventory (CSI) and its parental version. *Child Psychiatry and Human Development, 46*(5), 786-799. doi:10.1007/s10578-014-0520-0 | B1 |
| 1. Guralnik, J. M., Butterworth, S., Wadsworth, M. E. J., & Kuh, D. (2006). Childhood Socioeconomic Status Predicts Physical Functioning a Half Century Later. *The Journals of Gerontology: Series A: Biological Sciences and Medical Sciences, 61A*(7), 694-701. doi:10.1093/gerona/61.7.694 | B1 |
| 1. Gustafsson, M.-L., Laaksonen, C., Aromaa, M., Löyttyniemi, E., & Salanterä, S. (2018). The prevalence of neck-shoulder pain, back pain and psychological symptoms in association with daytime sleepiness - a prospective follow-up study of school children aged 10 to 15. *Scand J Pain, 18*(3), 389-397. doi:10.1515/sjpain-2017-0166 | B1 |
| 1. Hackett, R., Hackett, L., Bhakta, P., & Gowers, S. (1999). The prevalence and associations of psychiatric disorder in children in Kerala, South India. *Journal Of Child Psychology And Psychiatry, And Allied Disciplines, 40*(5), 801-807. | B1 |
| 1. Hain, C., Többen, B., & Schulz, W. (2001). Evaluation einer Integrativen Gruppentherapie mit Kindern. = Evaluation of integrative group therapy with children. *Praxis Der Kinderpsychologie Und Kinderpsychiatrie, 50*(5), 360-371. | B5 |
| 1. Hainsworth, K. R., Davies, W. H., Khan, K. A., & Weisman, S. J. (2009). Co-occurring chronic pain and obesity in children and adolescents: the impact on health-related quality of life. *Clinical Journal of Pain, 25*(8), 715-721. doi:10.1097/AJP.0b013e3181a3b689 | B1 |
| 1. Hale, M. E., Zimmerman, T. R., Jr., Ma, Y., & Malamut, R. (2017). Evaluation of Quality of Life, Functioning, Disability, and Work/School Productivity Following Treatment with an Extended-Release Hydrocodone Tablet Formulated with Abuse-Deterrence Technology: A 12-month Open-label Study in Patients with Chronic Pain. *Pain Pract, 17*(2), 229-238. doi:10.1111/papr.12433 | A2 |
| 1. Hartmaier, S. L., DeMuro-Mercon, C., Linder, S., Winner, P., & Santanello, N. C. (2001). Development of a brief 24-hour adolescent migraine functioning questionnaire. *Headache: The Journal of Head & Face Pain, 41*(2), 150-156. | B1 |
| 1. Haverkamp, F., Hönscheid, A., Rünger, M., Krois, A., & Harbauer, A. (2005). [Achievement motivation in children with migraine and their healthy siblings]. *Klinische Pädiatrie, 217*(4), 234-237. | B5 |
| 1. Haverkamp, F., Honscheid, A., & Muller-Sinik, K. (2002). Cognitive development in children with migraine and their healthy unaffected siblings. *Headache, 42*(8), 776-779. | B1 |
| 1. Haverkamp, F., Honscheid, A., & Muller-Sinik, K. (2002). Cognitive development in children with migraine and their healthy unaffected siblings. *Headache, 42*(8), 776-779. | B1 |
| 1. Havlínová, M., Komárek, L., Provazník, K., & Tomášek, L. (1990). Psychický vývoj budoucích učňů a studentů v období společné školní docházky: prospektivní longitudinální sledování 1980-88 (Pilotní studie). = Mental development of future apprentices and students in the period of their common school attendance: Prospective longitudinal follow-up 1980-88. *Psychológia a Patopsychológia Dieťaťa, 25*(6), 531-550. | B5 |
| 1. Havlinova, M., & Schneidrova, D. (1995). Stress characteristics in schoolchildren related to different educational strategies and school climates. *Central European Journal Of Public Health, 3*(4), 205-209. | B1 |
| 1. Hechler, T., Kanstrup, M., Holley, A. L., Simons, L. E., Wicksell, R., Hirschfeld, G., & Zernikow, B. (2015). Systematic Review on Intensive Interdisciplinary Pain Treatment of Children With Chronic Pain. *Pediatrics, 136*(1), 115-127. doi:10.1542/peds.2014-3319 | B2 |
| 1. Hechler, T., Kosfelder, J., Denecke, H., Dobe, M., Hubner, B., Martin, A., . . . Zernikow, B. (2008). [Pain-related coping strategies in children and adolescents with chronic pain. Validation of a German version of the Paediatric Pain Coping Inventory (PPCI revised)]. *Schmerz, 22*(4), 442-457. doi:10.1007/s00482-008-0621-4 | B5 |
| 1. Heimann, P., Herpertz-Dahlmann, B., Buning, J., Wagner, N., Stollbrink-Peschgens, C., Dempfle, A., & von Polier, G. G. (2018). Somatic symptom and related disorders in children and adolescents: Evaluation of a naturalistic inpatient multidisciplinary treatment. *Child and Adolescent Psychiatry and Mental Health, 12*. doi:10.1186/s13034-018-0239-y | B3 |
| 1. Hemmingson, H., & Borell, L. (2002). Environmental barriers in mainstream schools. *Child: Care, Health And Development, 28*(1), 57-63. doi:10.1046/j.1365-2214.2002.00240.x | A3 |
| 1. Hesketh, T., Zhen, Y., Lu, L., Dong, Z. X., Jun, Y. X., & Xing, Z. W. (2010). Stress and psychosomatic symptoms in Chinese school children: cross-sectional survey. *Archives of Disease in Childhood, 95*(2), 136-140. doi:10.1136/adc.2009.171660 | B1 |
| 1. Hinkelman, L., & Bruno, M. (2008). Identification and Reporting of Child Sexual Abuse: The Role of Elementary School Professionals. *Elementary School Journal, 108*(5), 376-391. | B1 |
| 1. Hjern, A., Alfven, G., & Ostberg, V. (2008). School stressors, psychological complaints and psychosomatic pain. *Acta Paediatrica (Oslo, Norway: 1992), 97*(1), 112-117. | B1 |
| 1. Holding, P. A., Taylor, H. G., Kazungu, S. D., Mkala, T., Gona, J., Mwamuye, B., . . . Stevenson, J. (2004). Assessing cognitive outcomes in a rural African population: Development of a neuropsychological battery in Kilifi District, Kenya. *Journal of the International Neuropsychological Society, 10*(2), 246-260. doi:10.1017/S1355617704102166 | B1 |
| 1. Holley, A. L., Wilson, A. C., & Palermo, T. M. (2017). Predictors of the transition from acute to persistent musculoskeletal pain in children and adolescents: a prospective study. *Pain, 158*(5), 794-801. doi:10.1097/j.pain.0000000000000817 | B1 |
| 1. Holm, S., Ljungman, G., Åsenlöf, P., Linton, S. J., & Söderlund, A. (2016). Treating youth in pain: Comparing tailored behavioural medicine treatment provided by physical therapists in primary care with physical exercises. *European Journal of Pain, 20*(4), 626-638. doi:10.1002/ejp.780 | B1 |
| 1. Honjo, S., Nishide, T., Niwa, S., Sasaki, Y., Kaneko, H., Inoko, K., & Nishide, Y. (2001). School refusal and depression with school attendance in children and adolescents: Comparative assessment between the Children's Depression Inventory and somatic complaints. *Psychiatry and Clinical Neurosciences, 55*(6), 629-634. doi:10.1046/j.1440-1819.2001.00916.x | B1 |
| 1. Honkinen, P. K., Suominen, S. B., Välimaa, R. S., Helenius, H. Y., & Rautava, P. T. (2005). Factors associated with perceived health among 12-year-old school children. Relevance of physical exercise and sense of coherence. *Scandinavian Journal of Public Health, 33*(1), 35-41. | B1 |
| 1. Hopf, H. (2010). Trennungsangst und Schulphobie: Wie Trennung bewältigt und Angst verarbeitet wird. = Fear of separation; As separation is mastered and fear is processed. *Analytische Kinder- und Jugendlichenpsychotherapie, 41*(148), 491-511. | B5 |
| 1. Hoppe, P., von Mackensen, S., Nowak, D., & Piel, E. (2002). [Prevalence of weather sensitivity in Germany]. *Dtsch Med Wochenschr, 127*(1-2), 15-20. doi:10.1055/s-2002-19429 | B5 |
| 1. Hovanitz, C., & Thatcher, D. (2012). Academic Aptitude as a Predictor of Headache Proneness During College: Could Headache be an Outcome of Low Test Scores? *International Journal of Behavioral Medicine, 19*(1), 97-103. doi:10.1007/s12529-010-9137-2 | A2 |
| 1. Howe, G. W., Feinstein, C., Reiss, D., Molock, S., & Berger, K. (1993). Adolescent adjustment to chronic physical disorders: I. Comparing neurological and non-neurological conditions. *Child Psychology & Psychiatry & Allied Disciplines, 34*(7), 1153-1171. doi:10.1111/j.1469-7610.1993.tb01780.x | B1 |
| 1. Hribar, N. (2001). Skupinsko delo z mladostniki. = Group therapy for adolescents. *Psihološka Obzorja / Horizons of Psychology, 10*(1), 71-79. | B5 |
| 1. Hunfeld, J. A., Passchier, J., Perquin, C. W., Hazebroek-Kampschreur, A. A., van Suijlekom-Smit, L. W., & van der Wouden, J. C. (2001). Quality of life in adolescents with chronic pain in the head or at other locations. *Cephalalgia, 21*(3), 201-206. | B1 |
| 1. Hunfeld, J. A. M., Perquin, C. W., Hazebroek-Kampschreur, A. A. J. M., Passchier, J., van Suijlekom-Smit, L. W. A., & van der Wouden, J. C. (2002). Physically unexplained chronic pain and its impact on children and their families: The mother's perception. *Psychology and Psychotherapy: Theory, Research and Practice, 75*(3), 251-260. doi:10.1348/147608302320365172 | B1 |
| 1. Hurrelmann, K. (1990). Parents, peers, teachers and other significant partners in adolescence. *International Journal of Adolescence and Youth, 2*(3), 211-236. doi:10.1080/02673843.1990.9747679 | B1 |
| 1. Hurrelmann, K., Engel, U., & Weidman, J. C. (1992). Impacts of school pressure, conflict with parents, and career uncertainty on adolescent stress in the Federal Republic of Germany. *International Journal of Adolescence and Youth, 4*(1), 33-50. doi:10.1080/02673843.1992.9747722 | B1 |
| 1. Huurre, T., Rahkonen, O., Komulainen, E., & Aro, H. (2005). Socioeconomic status as a cause and consequence of psychosomatic symptoms from adolescence to adulthood. *Social Psychiatry And Psychiatric Epidemiology, 40*(7), 580-587. | B1 |
| 1. Hyman, P. E., Bursch, B., Sood, M., Schwankovsky, L., Cocjin, J., & Zeltzer, L. K. (2002). Visceral pain-associated disability syndrome: a descriptive analysis. *Journal Of Pediatric Gastroenterology And Nutrition, 35*(5), 663-668. | B3 |
| 1. Höfler, C. (1992). [Psychosocial stress factors in the historical transition]. *Praxis Der Kinderpsychologie Und Kinderpsychiatrie, 41*(10), 350-353. | B5 |
| 1. Ibeziako, P., & Bujoreanu, S. (2011). Approach to psychosomatic illness in adolescents. *Current Opinion in Pediatrics, 23*(4), 384-389. doi:10.1097/MOP.0b013e3283483f1c | B1 |
| 1. Idemudia, E. S. (2011). Journal abstracts from current research in the field of child and adolescent mental health. *Journal Of Child And Adolescent Mental Health, 23*(1), 65-68. doi:10.2989/17280583.2011.594292 | B4 |
| 1. Ignar-Golinowska, B., & Roszkowska, H. (1991). [Effect of chronic nasopharyngeal diseases among 14-year-old students and extra-curricular factors on school performance]. *Roczniki Państwowego Zakładu Higieny, 42*(1), 91-99. | B5 |
| 1. Imran, N., Ani, C., Mahmood, Z., Hassan, K. A., & Bhatti, M. R. (2014). Anxiety and depression predicted by medically unexplained symptoms in Pakistani children: a case-control study. *J Psychosom Res, 76*(2), 105-112. doi:10.1016/j.jpsychores.2013.11.016 | B1 |
| 1. Ismail, S. S., & El-Mohsen, A. S. A. (2012). Headache in School Age Children and Its Possible Related Expected Predisposing Factors: An Assessment Study. *Life Science Journal-Acta Zhengzhou University Overseas Edition, 9*(1), 617-627. | B3 |
| 1. Ison, M. S. (2001). Evaluación de la memoria auditiva y visual en niños hiperactivos. = Evaluation of auditory and visual memory in hyperactive children. *Interdisciplinaria Revista de Psicología y Ciencias Afines, 18*(2), 155-168. | B5 |
| 1. Itoh, Y., Hamada, H., Imai, T., Seki, T., Igarashi, T., Yuge, K., . . . Yamamoto, M. (1997). Antinuclear antibodies in children with chronic nonspecific complaints. *Autoimmunity, 25*(4), 243-250. | B1 |
| 1. Iwamoto, S. (1996). A clinical study of school refusal: Prediction of prognosis in terms of school adjustment. *Japanese Journal of Child and Adolescent Psychiatry, 37*(4), 331-344. | B5 |
| 1. Iwamoto, S., & Yoshida, K. (1997). School refusal in Japan: The recent dramatic increase in incidence is a cause for concern. *Social Behavior and Personality, 25*(4), 315-319. doi:10.2224/sbp.1997.25.4.315 | B1 |
| 1. Jaime, F., Villagrán, A., Hernández, C., Ortiz, M., Serrano, C., & Harris, P. R. (2018). Functional gastrointestinal disorders in children from low socio‐economic status and Helicobacter pylori infection. *Child: Care, Health & Development, 44*(2), 319-325. doi:10.1111/cch.12486 | B1 |
| 1. Janssens, K. A., Klis, S., Kingma, E. M., Oldehinkel, A. J., & Rosmalen, J. G. (2014). Predictors for persistence of functional somatic symptoms in adolescents. *J Pediatr, 164*(4), 900-905.e902. doi:10.1016/j.jpeds.2013.12.003 | B1 |
| 1. Janssens, K. A., Oldehinkel, A. J., Dijkstra, J. K., Veenstra, R., & Rosmalen, J. G. (2011). School Absenteeism as a Perpetuating Factor of Functional Somatic Symptoms in Adolescents: The TRAILS Study. *Journal of Pediatrics, 159*(6), 988-993.e981. | B1 |
| 1. Jepma, M., Deinum, J., Asplund, C. L., Rombouts, S. A. R. B., Tamsma, J. T., Tjeerdema, N., . . . Nieuwenhuis, S. (2011). Neurocognitive function in dopamine-β-hydroxylase deficiency. *Neuropsychopharmacology, 36*(8), 1608-1619. doi:10.1038/npp.2011.42 | A3 |
| 1. Jordan, M. D., Kuendig, H., & Schmid, H. (2007). Stress scolaire et symptômes somatiques et psychoaffectifs chroniques à l'adolescence. = School related stress and chronic somatic and psycho-affective symptoms during adolescence. *Revue Francophone du Stress et du Trauma, 7*(3), 183-192. | B5 |
| 1. Josse, D., Thibault, H., Bourdais, C., Mirailles, P., Pireyre, E., Surgal, L., . . . Chauliac, M. (1999). Carence en fer et développement psychomoteur chez de jeunes enfants suivis en PMI. Évaluation avec l'échelle de développement psychomoteur Brunet-Lézine révisée. = Iron deficiency and psychomotor development in young children in a child health centre: Assessment with revised verson of the Brunet-Lézine scale. *A.N.A.E. Approche Neuropsychologique des Apprentissages chez l'Enfant, 11*(1), 21-27. | B5 |
| 1. Järvelin, M. R., Moilanen, I., Vikeväinen-Tervonen, L., & Huttunen, N.-P. (1990). Life changes and protective capacities in enuretic and non-enuretic children. *Child Psychology & Psychiatry & Allied Disciplines, 31*(5), 763-774. doi:10.1111/j.1469-7610.1990.tb00816.x | B1 |
| 1. Kaczmarek, M., & Trambacz-Oleszak, S. (2017). HRQoL impact of stressful life events in children beginning primary school: results of a prospective study in Poland. *Quality Of Life Research: An International Journal Of Quality Of Life Aspects Of Treatment, Care And Rehabilitation, 26*(1), 95-106. doi:10.1007/s11136-016-1371-x | B1 |
| 1. Kaczynski, K. J., Claar, R. L., & Lebel, A. A. (2013). Relations between pain characteristics, child and parent variables, and school functioning in adolescents with chronic headache: a comparison of tension-type headache and migraine. *Journal Of Pediatric Psychology, 38*(4), 351-364. doi:10.1093/jpepsy/jss120 | B1 |
| 1. Kain, Z. N., & Rimar, S. (1995). Management of chronic pain in children. *Pediatrics In Review / American Academy Of Pediatrics, 16*(6), 218-222. | B1 |
| 1. Kalapurakkel, S., Carpino, E. A., Lebel, A., & Simons, L. E. (2014). "Pain Can't Stop Me": Examining Pain Self-Efficacy and Acceptance as Resilience Processes Among Youth With Chronic Headache. *Journal Of Pediatric Psychology*. | B1 |
| 1. Kaltiala-Heino, R., Rimpelä, M., Rantanen, P., & Rimpelä, A. (2000). Bullying at school—an indicator of adolescents at risk for mental disorders. *Journal of Adolescence, 23*(6), 661-674. doi:10.1006/jado.2000.0351 | B1 |
| 1. Kantor, D. (2012). The impact of migraine on school performance. *Neurology, 79*(18), e168-169. doi:10.1212/WNL.0b013e3182745a97 | B4 |
| 1. Karwautz, A., Wober, C., Lang, T., Bock, A., Wagner-Ennsgraber, C., Vesely, C., . . . Wober-Bingol, C. (1999). Psychosocial factors in children and adolescents with migraine and tension-type headache: a controlled study and review of the literature. *Cephalalgia, 19*(1), 32-43. | A2 |
| 1. Karwautz, A., Woberbingol, C., & Wober, C. (1993). IDIOPATHIC HEADACHE IN CHILDHOOD AND ADOLESCENCE. *Nervenarzt, 64*(12), 753-765. | B5 |
| 1. Karvonen, S., Vikat, A., & Rimpela, M. (2005). The role of school context in the increase in young people's health complaints in Finland. *J Adolesc, 28*(1), 1-16. doi:10.1016/j.adolescence.2004.05.006 | B1 |
| 1. Kashikar-Zuck, S., Cunningham, N., Sil, S., Bromberg, M. H., Lynch-Jordan, A. M., Strotman, D., . . . Arnold, L. M. (2014). Long-term outcomes of adolescents with juvenile-onset fibromyalgia in early adulthood. *Pediatrics, 133*(3), e592-e600. doi:10.1542/peds.2013-2220 | A2 |
| 1. Kashikar-Zuck, S., Johnston, M., Ting, T. V., Graham, B. T., Lynch-Jordan, A. M., Verkamp, E., . . . Lovell, D. (2010). Relationship between school absenteeism and depressive symptoms among adolescents with juvenile fibromyalgia. *Journal Of Pediatric Psychology, 35*(9), 996-1004. doi:10.1093/jpepsy/jsq020 | B1 |
| 1. Kashikar-Zuck, S., Lynch, A. M., Slater, S., Graham, T. B., Swain, N. F., & Noll, R. B. (2008). Family factors, emotional functioning, and functional impairment in juvenile fibromyalgia syndrome. *Arthritis Rheum, 59*(10), 1392-1398. doi:10.1002/art.24099 | B1 |
| 1. Kashikar-Zuck, S., Vaught, M. H., Goldschneider, K. R., Graham, T. B., & Miller, J. C. (2002). Depression, coping, and functional disability in juvenile primary fibromyalgia syndrome. *Journal of Pain, 3*(5), 412-419. | B1 |
| 1. Kashikar-Zuck, S., Zafar, M., Barnett, K. A., Aylward, B. S., Strotman, D., Slater, S. K., . . . Powers, S. W. (2013). Quality of life and emotional functioning in youth with chronic migraine and juvenile fibromyalgia. *Clinical Journal of Pain, 29*(12), 1066-1072. doi:10.1097/AJP.0b013e3182850544 | B1 |
| 1. Kawa, K. (1992). [Chronic fatigue syndrome in school children]. *Nihon Rinsho. Japanese Journal Of Clinical Medicine, 50*(11), 2606-2611. | B5 |
| 1. Kebers, F., Janvier, S., Colin, A., Legros, J. J., & Ansseau, M. (2002). [What is the interest of Klinefelter's syndrome for (child) psychiatrists?]. *L'encéphale, 28*(3 Pt 1), 260-265. | B5 |
| 1. Kemper, K. J., Heyer, G., Pakalnis, A., & Binkley, P. F. (2016). What Factors Contribute to Headache-Related Disability in Teens? *Pediatric Neurology, 56*, 48-54. doi:10.1016/j.pediatrneurol.2015.10.024 | B1 |
| 1. Kernick, D., Reinhold, D., & Campbell, J. L. (2009). Impact of headache on young people in a school population. *Br J Gen Pract, 59*(566), 678-681. doi:10.3399/bjgp09X454142 | B1 |
| 1. Kesler, S. R., Sheau, K., Koovakkattu, D., & Reiss, A. L. (2011). Changes in frontal-parietal activation and math skills performance following adaptive number sense training: Preliminary results from a pilot study. *Neuropsychological Rehabilitation, 21*(4), 433-454. doi:10.1080/09602011.2011.578446 | A3 |
| 1. Khan, K. A., Tran, S. T., Jastrowski Mano, K. E., Simpson, P. M., Cao, Y., & Hainsworth, K. R. (2014). Predicting Multiple Facets of School Functioning in Pediatric Chronic Pain: Examining the Direct Impact of Anxiety. *The Clinical Journal Of Pain*. | B3 |
| 1. Kim, J., Chung, H., Amtmann, D., Salem, R., Park, R., & Askew, R. L. (2014). Symptoms and quality of life indicators among children with chronic medical conditions. *Disability and Health Journal, 7*(1), 96-104. doi:10.1016/j.dhjo.2013.08.007 | A3 |
| 1. King, N. J., Ollendick, T. H., Murphy, G. C., & Molloy, G. N. (1998). Utility of relaxation training with children in school settings: A plea for realistic goal setting and evaluation. *British Journal of Educational Psychology, 68*(1), 53-66. doi:10.1111/j.2044-8279.1998.tb01274.x | B1 |
| 1. Kingma, E. M., Janssens, K. A., Venema, M., Ormel, J., de Jonge, P., & Rosmalen, J. G. (2011). Adolescents with low intelligence are at risk of functional somatic symptoms: the TRAILS study. *J Adolesc Health, 49*(6), 621-626. doi:10.1016/j.jadohealth.2011.04.022 | B1 |
| 1. Kingma, E. M., M. Rosmalen, J. G., White, P. D., Stansfeld, S. A., & Clark, C. (2013). The prospective association between childhood cognitive ability and somatic symptoms and syndromes in adulthood: the 1958 British birth cohort. *Journal of Epidemiology & Community Health, 67*(12), 1047-1053. doi:10.1136/jech-2013-202850 | B1 |
| 1. Kingma, E. M., Tak, L. M., Huisman, M., & Rosmalen, J. G. M. (2009). Intelligence is negatively associated with the number of functional somatic symptoms. *Journal of Epidemiology and Community Health, 63*(11), 900-U954. doi:10.1136/jech.2008.081638 | A2 |
| 1. Kirchner, T., Forns, M., & Amador, J. A. (2006). Eighteen month test-retest stability of the youth self report in a sample of Catalonian adolescents. *Psychological Reports, 99*(2), 635-640. | B1 |
| 1. Kiriakidis, S. (2009). School bullying: Psychosocial effects on students. *Psychology: The Journal of the Hellenic Psychological Society, 16*(1), 77-98. | B2 |
| 1. Kiuru, N., Aunola, K., Nurmi, J. E., Leskinen, E., & Salmela-Aro, K. (2008). Peer group influence and selection in adolescents' school burnout - A longitudinal study. *Merrill-Palmer Quarterly-Journal of Developmental Psychology, 54*(1), 23-55. doi:10.1353/mpq.2008.0008 | B1 |
| 1. Knook, L. M. E., Lijmer, J. G., Konijnenberg, A. Y., Hordijk, P. M., & van Engeland, H. (2012). Quality of life and academic functioning 6 years after paediatric referral for chronic pain. *Acta Paediatrica, 101*(9), 957-963. doi:10.1111/j.1651-2227.2012.02766.x | B1 |
| 1. Knyazev, G. G., Slobodskaya, H. R., Safronova, M. V., & Savina, N. N. (2001). Socio-economic and school factors of psychological and physical health in Siberian schoolchildren. *International Journal Of Circumpolar Health, 60*(2), 268-274. | B1 |
| 1. Koberda, J. L., Moses, A., Koberda, P., & Koberda, L. (2013). Clinical Advantages of Quantitative Electroencephalogram (QEEG)-Electrical Neuroimaging Application in General Neurology Practice. *Clinical Eeg and Neuroscience, 44*(4), 273-285. doi:10.1177/1550059412475291 | B1 |
| 1. Koivusilta, L., Rimpelä, A., & Rimpelä, M. (1998). Health related lifestyle in adolescence predicts adult educational level: a longitudinal study from Finland. *Journal Of Epidemiology And Community Health, 52*(12), 794-801. | B1 |
| 1. Kolch, M. (2012). Comorbidities of somatoform disorders in childhood and adolescence. *Monatsschrift Kinderheilkunde, 160*(1), 27-31. doi:10.1007/s00112-011-2514-3 | B5 |
| 1. Kollár, K. N., Martonné Tamás, M., Porkolábné Balogh, K., & Gyenei, M. (1999). Iskolás gyerekek terhelési szintje, pszichoszomatikus egészségi állapota és társas kapcsolatai. = Level of burden, physical and psychological health and social relationship of schoolchildren. *Magyar Pszichológiai Szemle, 54*(3), 405-428. | B5 |
| 1. Koller, H. P. (1997). How does vision affect learning? *Journal of Ophthalmic Nursing & Technology, 16*(1), 7-11. | B4 |
| 1. Kongsted, A., Davies, L., & Axen, I. (2015). Low back pain patients in Sweden, Denmark and the UK share similar characteristics and outcomes: a cross-national comparison of prospective cohort studies. *BMC Musculoskelet Disord, 16*, 367. doi:10.1186/s12891-015-0824-7 | A2 |
| 1. Konijnenberg, A. Y., de Graeff-Meeder, E. R., van der Hoeven, J., Kimpen, J. L., Buitelaar, J. K., & Uiterwaal, C. S. (2006). Psychiatric morbidity in children with medically unexplained chronic pain: diagnosis from the pediatrician's perspective. *Pediatrics, 117*(3), 889-897. doi:10.1542/peds.2005-0109 | B3 |
| 1. Kontos, A. P., Elbin, R. J., Lau, B., Simensky, S., Freund, B., French, J., & Collins, M. W. (2013). Posttraumatic migraine as a predictor of recovery and cognitive impairment after sport-related concussion. *The American Journal Of Sports Medicine, 41*(7), 1497-1504. doi:10.1177/0363546513488751 | A3 |
| 1. Konu, A., & Lintonen, T. (2006). Theory-based survey analysis of well-being in secondary schools in Finland. *Health Promotion International, 21*(1), 27-36. doi:10.1093/heapro/dai028 | B1 |
| 1. Kopecky-Wenzel, M., & Reiner, F. (2010). [A video based training in communication skills for physicians]. *Prax Kinderpsychol Kinderpsychiatr, 59*(3), 207-223. doi:10.13109/prkk.2010.59.3.207 | B5 |
| 1. Kosola, S., Mundy, L. K., Sawyer, S. M., Canterford, L., van der Windt, D. A., Dunn, K. M., & Patton, G. C. (2017). Pain and learning in primary school: a population-based study. *Pain, 158*(9), 1825-1830. doi:10.1097/j.pain.0000000000000984 | B1 |
| 1. Koteles, F., Freyler, A., Kokonyei, G., & Bardos, G. (2015). Family background of modern health worries, somatosensory amplification, and health anxiety: A questionnaire study. *J Health Psychol, 20*(12), 1549-1557. doi:10.1177/1359105313516661 | B1 |
| 1. Kovacic, K., Williams, S., Li, B. U., Chelimsky, G., & Miranda, A. (2013). High prevalence of nausea in children with pain-associated functional gastrointestinal disorders: are Rome criteria applicable? *J Pediatr Gastroenterol Nutr, 57*(3), 311-315. doi:10.1097/MPG.0b013e3182964203 | B1 |
| 1. Kovacs, F. M., Garcia, M. G., Oliver-Frontera, M., Calvo, M., Sanchez, J. L., Vecchierini, N. M., & Sampol, P. P. (2008). The Influence of Parents on Habits and Substance Use in Adolescents of Palma de Mallorca, Spain, in 2003. *Revista Espanola De Salud Publica, 82*(6), 677-689. | B5 |
| 1. Kozlowska, K., English, M., Savage, B., Chudleigh, C., Davies, F., Paull, M., . . . Jenkins, A. (2013). Multimodal Rehabilitation: A Mind-Body Family-Based Intervention for Children and Adolescents Impaired by Medically Unexplained Symptoms. Part 2: Case Studies and Outcomes. *American Journal of Family Therapy, 41*(3), 212-231. doi:10.1080/01926187.2012.677723 | B1 |
| 1. Kriss, I., & Evans, B. J. W. (2005). The relationship between dyslexia and Meares-Irlen Syndrome. *Journal of Research in Reading, 28*(3), 350-364. doi:10.1111/j.1467-9817.2005.00274.x | B1 |
| 1. Krogh, A. B., Larsson, B., & Linde, M. (2015). Prevalence and disability of headache among Norwegian adolescents: A cross-sectional school-based study. *Cephalalgia, 35*(13), 1181-1191. doi:10.1177/0333102415573512 | B1 |
| 1. Krogh, A. B., Larsson, B., Salvesen, O., & Linde, M. (2016). Assessment of headache characteristics in a general adolescent population: a comparison between retrospective interviews and prospective diary recordings. *J Headache Pain, 17*, 14. doi:10.1186/s10194-016-0602-4 | B1 |
| 1. Kubik, A. (2010). [Neurofeedback and personal development]. *Przegla̧d Lekarski, 67*(9), 716-720. | B5 |
| 1. Kumar, G., Chhabra, A., Dewan, V., & Yadav, T. P. (2017). Idiopathic musculoskeletal pain in Indian children-Prevalence and impact on daily routine. *Revista Brasileira De Reumatologia, 57*(1), 8-14. doi:10.1016/j.rbre.2015.07.015 | B1 |
| 1. Kusché, C. A., Cook, E. T., & Greenberg, M. T. (1993). Neuropsychological and cognitive functioning in children with anxiety, externalizing, and comorbid psychopathology. *Journal of Clinical Child Psychology, 22*(2), 172-195. doi:10.1207/s15374424jccp2202_5 | B1 |
| 1. Köllner, V. (1995). [Education in Psychosomatic medicine and psychotherapy in the German Federal Republic]. *Therapeutische Umschau. Revue Thérapeutique, 52*(2), 118-122. | B5 |
| 1. Köllner, V., Gahn, G., Kallert, T., Felber, W., Reichmann, H., Dieter, P., . . . Joraschky, P. (2003). [Teaching of psychosomatic medicine and psychotherapy as an element of the Dresden DIPOL-Curriculum -- the PBL-course "Nervous system" and psyche]. *Psychotherapie, Psychosomatik, Medizinische Psychologie, 53*(2), 47-55. | B5 |
| 1. Laftman, S. B., Almquist, Y. B., & Ostberg, V. (2013). Students' accounts of school-performance stress: a qualitative analysis of a high-achieving setting in Stockholm, Sweden. *Journal of Youth Studies, 16*(7), 932-949. doi:10.1080/13676261.2013.780126 | B2 |
| 1. Laftman, S. B., & Modin, B. (2012). School-performance indicators and subjective health complaints: are there gender differences? *Sociology of Health & Illness, 34*(4), 608-625. doi:10.1111/j.1467-9566.2011.01395.x | B1 |
| 1. Lahad, A., & Sarig-Bahat, H. (2007). [Israeli guidelines for prevention of low back pain]. *Harefuah, 146*(4), 253. | B5 |
| 1. Lalouni, M., Olén, O., Bonnert, M., Hedman, E., Serlachius, E., & Ljótsson, B. (2016). Exposure-Based Cognitive Behavior Therapy for Children with Abdominal Pain: A Pilot Trial. *PLoS One, 11*(10), e0164647-e0164647. doi:10.1371/journal.pone.0164647 | B1 |
| 1. Lamers, F., Hickie, I., & Merikangas, K. R. (2013). Prevalence and correlates of prolonged fatigue in a u.s. Sample of adolescents. *American Journal of Psychiatry, 170*(5), 502-510. doi:10.1176/appi.ajp.2012.12040454 | B1 |
| 1. Langmann, A., Lindner, S., & Kreichbaum, N. (2001). Functional reduction of vision and visual conversion reaction ina paediatric population. *Klinische Monatsblatter Fur Augenheilkunde, 218*(10), 677-681. doi:10.1055/s-2001-18390 | B5 |
| 1. Laqueille, X., Launay, C., Dervaux, A., & Kanit, M. (2007). Quelle démarche de soins et d'accompagnement? Dépendances à l'alcool et aux benzodiazépines chez le toxicomane sous traitement de substitution aux opiacés. = What type of care and support? Alcohol and benzodiazepines dependence during opioid substitution treatment. *Alcoologie et Addictologie, 29*(4), 398-403. | B5 |
| 1. Laqueille, X., Launay, C., Dervaux, A., & Kanit, M. (2009). Abus d’alcool et de benzodiazépines lors des traitements de substitution chez l’héroïnomane: Une revue de la littérature. = Abuse of alcohol and benzodiazepine during substitution therapy in heroin addicts: A review of the literature. *L'Encéphale: Revue de psychiatrie clinique biologique et thérapeutique, 35*(3), 220-225. doi:10.1016/j.encep.2008.05.005 | B5 |
| 1. Larosa, E., Consoli, S. M., Hubert-Vadenay, T., & Leclésiau, H. (2005). [Factors associated with suicidal risk among consulting young people in a preventive health center]. *L'encéphale, 31*(3), 289-299. | B5 |
| 1. Larsson, B., & Sund, A. M. (2005). One-year incidence, course, and outcome predictors of frequent headaches among early adolescents. *Headache: The Journal of Head & Face Pain, 45*(6), 684-691. | B1 |
| 1. Lau, B., Lovell, M. R., Collins, M. W., & Pardini, J. (2009). Neurocognitive and symptom predictors of recovery in high school athletes. *Clinical Journal of Sport Medicine, 19*(3), 216-221. doi:10.1097/JSM.0b013e31819d6edb | A3 |
| 1. Laukkanen, E. R., Shemeikka, S. L., Viinamaki, H. T., Polkki, P. L., & Lehtonen, J. O. (2001). Heavy drinking is associated with more severe psychosocial dysfunction among girls than boys in Finland. *J Adolesc Health, 28*(4), 270-277. | B1 |
| 1. Laukkanen, E., Shemeikka, S., Notkola, I.-L., Koivumaa-Honkanen, H., & Nissinen, A. (2002). Externalizing and internalizing problems at school as signs of health-damaging behaviour and incipient marginalization. *Health Promotion International, 17*(2), 139-146. | B1 |
| 1. Laurell, K., Artto, V., Bendtsen, L., Hagen, K., Haggstrom, J., Linde, M., . . . Kallela, M. (2016). Premonitory symptoms in migraine: A cross-sectional study in 2714 persons. *Cephalalgia, 36*(10), 951-959. doi:10.1177/0333102415620251 | B1 |
| 1. Laurell, K., Larsson, B., & Eeg-Olofsson, O. (2004). Prevalence of headache in Swedish schoolchildren, with a focus on tension-type headache. *Cephalalgia, 24*(5), 380-388. doi:10.1111/j.1468-2982.2004.00681.x | B1 |
| 1. Lavados, P. M., & Tenhamm, E. (1998). Epidemiology of tension-type headache in Santiago, Chile: a prevalence study. *Cephalalgia, 18*(8), 552-558. | A2 |
| 1. Law, E. F., Beals-Erickson, S. E., Noel, M., Claar, R., & Palermo, T. M. (2015). Pilot Randomized Controlled Trial of Internet-Delivered Cognitive-Behavioral Treatment for Pediatric Headache. *Headache, 55*(10), 1410-1425. doi:10.1111/head.12635 | B1 |
| 1. Lay, C. L., & Broner, S. W. (2008). Adolescent issues in migraine: a focus on menstrual migraine. *Current Pain And Headache Reports, 12*(5), 384-387. | B1 |
| 1. Lecardeur, L. (2013). Psychopathology of multiplayer online game. *Annales Medico-Psychologiques, 171*(8), 579-586. doi:10.1016/j.amp.2013.06.011 | B5 |
| 1. Lee, K. H., & Woo, S. B. (2013). Significance of Continuous Performance Test in Children with Headaches. *Cephalalgia, 33*(S8), 189-190. | B4 |
| 1. Lee, S. Y., Park, H. S., Kim, J. M., Lee, J. M., Koh, S. E., Lee, I. S., & Jung-Choi, K. H. (2007). *Neck and backpain in relation to computer use among high-school students* | B4 |
| 1. Legault, E. P., Cantin, V., & Descarreaux, M. (2014). Assessment of musculoskeletal symptoms and their impacts in the adolescent population: adaptation and validation of a questionnaire. *BMC Pediatrics, 14*, 173-173. doi:10.1186/1471-2431-14-173 | B1 |
| 1. Legault, É. P., Descarreaux, M., & Cantin, V. (2015). Musculoskeletal symptoms in an adolescent athlete population: a comparative study. *BMC Musculoskeletal Disorders, 16*, 210-210. doi:10.1186/s12891-015-0681-4 | B1 |
| 1. Lemma, P., Borraccino, A., Berchialla, P., Dalmasso, P., Charrier, L., Vieno, A., . . . Cavallo, F. (2014). Well-being in 15-year-old adolescents: a matter of relationship with school. *Journal Of Public Health (Oxford, England)*. | B1 |
| 1. Lenzi, M., Vieno, A., de Vogli, R., Santinello, M., Ottova, V., Baška, T., . . . de Matos, M. G. (2013). Perceived teacher unfairness and headache in adolescence: A cross-national comparison. *International Journal of Public Health, 58*(2), 227-235. doi:10.1007/s00038-012-0345-1 | B1 |
| 1. Lepore, S. J., & Kliewer, W. (2013). Violence Exposure, Sleep Disturbance, and Poor Academic Performance in Middle School. *Journal of Abnormal Child Psychology, 41*(8), 1179-1189. doi:10.1007/s10802-013-9709-0 | B1 |
| 1. Lewis, K. S. (2009). Chronic daily headaches in children and adolescents. *Seminars in Pediatric Neurology, 16*(1), 31-33. doi:10.1016/j.spen.2009.03.001 | B1 |
| 1. Li, H., Wei, X., Ma, A., & Chung, R. Y. (2014). Inequalities in health status among rural residents: EQ-5D findings from household survey China. *International Journal For Equity In Health, 13*, 41-41. doi:10.1186/1475-9276-13-41 | A2 |
| 1. Lighezzolo, J., Diwo, R., Claudon, P., & De Tychey, C. (2007). Risque suicidaire à l'adolescence. Prévention en milieu scolaire. = Suicidal risk during adolescence. Prevention in school area. *Revue Francophone du Stress et du Trauma, 7*(3), 162-172. | B5 |
| 1. Light, R., Asarnow, R., Satz, P., Zaucha, K., McCleary, C., & Lewis, R. (1998). Mild closed-head injury in children and adolescents: Behavior problems and academic outcomes. *Journal of Consulting and Clinical Psychology, 66*(6), 1023-1029. doi:10.1037/0022-006X.66.6.1023 | B1 |
| 1. Lima, A. S., de Araújo, R. C., Gomes, M. R. d. A., de Almeida, L. R., de Souza, G. F. F., Cunha, S. B., & Pitangui, A. C. R. (2014). Prevalence of headache and its interference in the activities of daily living in female adolescent students. *Revista Paulista De Pediatria: Orgão Oficial Da Sociedade De Pediatria De São Paulo, 32*(2), 256-261. | B1 |
| 1. Limon, S., Valinsky, L. J., & Ben-Shalom, Y. (2004). Children at risk: risk factors for low back pain in the elementary school environment. *Spine, 29*(6), 697-702. | B1 |
| 1. Lin, H. (2001). Behavior problems and self-concept of underachieving pupils. *Chinese Journal of Clinical Psychology, 9*(4), 271-272. | B5 |
| 1. Ling, S. C., Chow, C. B., Chan, A., Tse, K., Mok, K. W., & Ng, S. F. (2002). Lead poisoning in new immigrant children from the mainland of China. *Chinese Medical Journal, 115*(1), 17-20. | A4 |
| 1. Ling, T.-S., & Jiar, Y.-K. (2017). Working Memory and Behavioural Problems in Relation to Malay Writing of Primary School Children. *International Journal of Evaluation and Research in Education, 6*(3), 189-197. | B1 |
| 1. Lipton, R. B., Buse, D. C., Saiers, J., Fanning, K. M., Serrano, D., & Reed, M. L. (2013). Frequency and burden of headache-related nausea: results from the American Migraine Prevalence and Prevention (AMPP) study. *Headache, 53*(1), 93-103. doi:10.1111/j.1526-4610.2012.02292.x | A2 |
| 1. Lipton, R. B., Manack, A., Ricci, J. A., Chee, E., Turkel, C. C., & Winner, P. (2011). Prevalence and burden of chronic migraine in adolescents: Results of the chronic daily headache in adolescents study (C‐dAS). *Headache: The Journal of Head and Face Pain, 51*(5), 693-706. doi:10.1111/j.1526-4610.2011.01885.x | B1 |
| 1. Lipton, R. B., Stewart, W. F., & Von Korff, M. (1995). Migraine impact and functional disability. *Cephalalgia, 15 Suppl 15*, 4-9. | B1 |
| 1. Livanis, A., & Tryon, G. S. (2010). The Development of the Adolescent Nervios Scale: Preliminary Findings. *Cultural Diversity & Ethnic Minority Psychology, 16*(1), 9-15. doi:10.1037/a0014905 | B1 |
| 1. Logan, D., Zelikovsky, N., Labay, L., & Spergel, J. (2003). The Illness Management Survey: Identifying Adolescents' Perceptions of Barriers to Adherence. *Journal of Pediatric Psychology, 28*(6), 383-392. doi:10.1093/jpepsy/jsg028 | A3 |
| 1. Logan, D. E., Coakley, R. M., & Scharff, L. (2007). Teachers' perceptions of and responses to adolescents with chronic pain syndromes. *Journal Of Pediatric Psychology, 32*(2), 139-149. | A2 |
| 1. Logan, D. E., Engle, L., Feinstein, A. B., Sieberg, C. B., Sparling, P., Cohen, L. L., . . . Masuda, A. (2012). Ecological system influences in the treatment of pediatric chronic pain. *Pain Research & Management, 17*(6), 407-411. | B2 |
| 1. Logan, D. E., & Simons, L. E. (2010). Development of a group intervention to improve school functioning in adolescents with chronic pain and depressive symptoms: a study of feasibility and preliminary efficacy. *Journal Of Pediatric Psychology, 35*(8), 823-836. doi:10.1093/jpepsy/jsq008 | B3 |
| 1. Logan, D. E., Simons, L. E., & Carpino, E. A. (2012). Too sick for school? Parent influences on school functioning among children with chronic pain. *Pain, 153*(2), 437-443. doi:10.1016/j.pain.2011.11.004 | B1 |
| 1. Logan, D. E., Simons, L. E., & Kaczynski, K. J. (2009). School functioning in adolescents with chronic pain: the role of depressive symptoms in school impairment. *Journal Of Pediatric Psychology, 34*(8), 882-892. doi:10.1093/jpepsy/jsn143 | B3 |
| 1. Logan, D. E., Simons, L. E., Stein, M. J., & Chastain, L. (2008). School impairment in adolescents with chronic pain. *Journal of Pain, 9*(5), 407-416. | B3 |
| 1. Logan, D. E., Williams, S. E., Carullo, V. P., Claar, R. L., Bruehl, S., & Berde, C. B. (2013). Children and adolescents with complex regional pain syndrome: more psychologically distressed than other children in pain? *Pain Research & Management: The Journal Of The Canadian Pain Society = Journal De La Société Canadienne Pour Le Traitement De La Douleur, 18*(2), 87-93. | B1 |
| 1. Lohre, A., Lydersen, S., & Vatten, L. J. (2010). Factors associated with internalizing or somatic symptoms in a cross-sectional study of school children in grades 1-10. *Child Adolesc Psychiatry Ment Health, 4*, 33. doi:10.1186/1753-2000-4-33 | B1 |
| 1. Lu, S. R., Fuh, J. L., Juang, K. D., & Wang, S. J. (2000). Migraine prevalence in adolescents aged 13-15: a student population-based study in Taiwan. *Cephalalgia, 20*(5), 479-485. | B1 |
| 1. Lui, D. P. Y., Szeto, G. P. Y., & Jones, A. Y. M. (2011). The pattern of electronic game use and related bodily discomfort in hong kong primary school children. *Computers & Education, 57*(2), 1665-1674. doi:10.1016/j.compedu.2011.03.008 | B1 |
| 1. Luis, N. B. S. (2004). Bullying: Concealed by Behavioral and Somatic Symptoms: Dr. Nerissa B. San Luis. *Journal of Developmental and Behavioral Pediatrics, 25*(5), 348-349. | A3 |
| 1. Lundqvist, C., Clench-Aas, J., Hofoss, D., & Bartonova, A. (2006). Self-reported headache in schoolchildren: Parents underestimate their children's headaches. *Acta Paediatrica, 95*(8), 940-946. doi:10.1080/08035250600678810 | B1 |
| 1. Luntamo, T., Sourander, A., Sillanmaki, L., Gyllenberg, D., Aromaa, M., Kumpulainen, K., . . . Piha, J. (2012). Pain at age eight as a predictor of antidepressant medication use by age 24: Findings from the Finnish nationwide 1981 birth cohort study. *Journal Of Affective Disorders, 138*(1-2), 153-159. doi:10.1016/j.jad.2012.01.003 | B1 |
| 1. Lynch, A. M., Kashikar-Zuck, S., Goldschneider, K. R., & Jones, B. A. (2006). Psychosocial risks for disability in children with chronic back pain. *J Pain, 7*(4), 244-251. doi:10.1016/j.jpain.2005.11.001 | B1 |
| 1. Låftman, S. B., & Magnusson, C. (2017). Do health complaints in adolescence negatively predict the chance of entering tertiary education in young adulthood? *Scandinavian Journal of Public Health, 45*(8), 878-885. doi:10.1177/1403494817713649 | B1 |
| 1. Låftman, S. B., Modin, B., Östberg, V., Hoven, H., & Plenty, S. (2015). Effort–reward imbalance in the school setting: Associations with somatic pain and self-rated health. *Scandinavian Journal of Public Health, 43*(2), 123-129. doi:10.1177/1403494814561818 | B1 |
| 1. Machens, R. (2007). [The sick child in family practice. Competence test for the family physician]. *MMW Fortschritte Der Medizin, 149*(1-2), 56-56. | B5 |
| 1. Maciel, S. C., Jennings, F., Jones, A., & Natour, J. (2009). The development and validation of a Low Back Pain Knowledge Questionnaire - LKQ. *Clinics (São Paulo, Brazil), 64*(12), 1167-1175. doi:10.1590/S1807-59322009001200006 | A3 |
| 1. Madden, V. J., Bellan, V., Russek, L. N., Camfferman, D., Vlaeyen, J. W. S., & Moseley, G. L. (2016). Pain by Association? Experimental Modulation of Human Pain Thresholds Using Classical Conditioning. *J Pain, 17*(10), 1105-1115. doi:10.1016/j.jpain.2016.06.012 | A2 |
| 1. Maganto, C., & Garaigordobil, M. (2010). Estudio psicométrico del Screening de Problemas de Conducta Infantil SPCI. = Psychometric study of the Children's Behavior Problem Screening Test SPCI. *Psicothema, 22*(2), 316-322. | B5 |
| 1. Magistretti, G., & Carbonetto, G. (1997). Quali adolescenti? Quali aiuti specialistici alla loro crescita psicologica? = Adolescents ask for help: What answer to their requests from mental health services? *Ricerche di Psicologia, 21*(3), 75-90. | B5 |
| 1. Majedi, H., Dehghani, S. S., Soleyman-Jahi, S., Meibodi, S. A. E., Mireskandari, S. M., Hajiaghababaei, M., . . . Cleeland, C. S. (2017). Validation of the Persian version of the Brief Pain Inventory (BPI-P) in chronic pain patients. *Journal of Pain and Symptom Management, 54*(1), 132-138. doi:10.1016/j.jpainsymman.2017.02.017 | A2 |
| 1. Major, J., Varga, Z. K., Gyimesi-Szikszai, A., & Adam, S. (2017). A two-week inpatient programme with a booster improved long-term management of severe chronic paediatric pain. *J Child Health Care, 21*(2), 171-180. doi:10.1177/1367493517697479 | B1 |
| 1. Maksimović, M., Kocijancić, R., Backović, D., Ille, T., & Paunović, K. (2005). [Adaptation and mental-hygienic characteristics of internally displaced adolescents]. *Srpski Arhiv Za Celokupno Lekarstvo, 133*(5-6), 266-271. | B5 |
| 1. Malaty, H. M., Abudayyeh, S., O'Malley, K. J., Wilsey, M. J., Fraley, K., Gilger, M. A., . . . Rabeneck, L. Development of a Multidimensional Measure for Recurrent Abdominal Pain in Children: Population-Based Studies in Three Settings. *Pediatrics, 115*(2), e210-e215. doi:10.1542/peds.2004-1412 | B1 |
| 1. Malhi, P., & Singhi, P. (2004). Functional somatic complaints and psychosocial functioning in children and adolescents. *Studia Psychologica, 46*(2), 163-171. | B1 |
| 1. Malleson, P. N., Almatar, M., & Petty, R. E. (1992). IDIOPATHIC MUSCULOSKELETAL PAIN SYNDROMES IN CHILDREN. *Journal of Rheumatology, 19*(11), 1786-1789. | B1 |
| 1. Malmborg, J. S., Olsson, M. C., Bergman, S., & Bremander, A. (2018). Musculoskeletal pain and its association with maturity and sports performance in 14-year-old sport school students. *BMJ Open Sport & Exercise Medicine, 4*(1), e000395-e000395. doi:10.1136/bmjsem-2018-000395 | B1 |
| 1. Mardomingo, M. J., Díaz, M. C., & Espinoza, A. (1994). Análisis de la demanda asistencial en Psiquiatría Infantil en la edad escolar. = Analysis of care-seeking in child psychiatry during school age. *Revista de Psiquiatría Infanto-Juvenil, 3*, 162-171. | B5 |
| 1. Marrow, J. (2013). Feminine power or feminine weakness? North Indian girls' struggles with aspirations, agency, and psychosomatic illness. *American Ethnologist, 40*(2), 347-361. doi:10.1111/amet.12026 | B1 |
| 1. Matre, D., Andersen, M. R., Knardahl, S., & Nilsen, K. B. (2016). Conditioned pain modulation is not decreased after partial sleep restriction. *Eur J Pain, 20*(3), 408-416. doi:10.1002/ejp.741 | A2 |
| 1. Martyn, D., Andrews, L., & Byrne, M. (2014). Prevalence rates and risk factors for mental health difficulties in adolescents aged 16 and 17 years living in rural Ireland. *Irish Journal of Psychological Medicine, 31*(2), 111-123. doi:10.1017/ipm.2014.20 | B1 |
| 1. Mathet, F., Martin-Guehl, C., Maurice-Tison, S., & Bouvard, M. P. (2003). [Prevalence of depressive disorders in children and adolescents attending primary care. A survey with the Aquitaine Sentinelle Network]. *L'encéphale, 29*(5), 391-400. | B5 |
| 1. Mattila, V. M., Saarni, L., Parkkari, J., Koivusilta, L., & Rimpelä, A. (2008). Predictors of low back pain hospitalization--a prospective follow-up of 57,408 adolescents. *Pain, 139*(1), 209-217. doi:10.1016/j.pain.2008.03.028 | B1 |
| 1. Maynard, C. S., Amari, A., Wieczorek, B., Christensen, J. R., & Slifer, K. J. (2010). Interdisciplinary Behavioral Rehabilitation of Pediatric Pain-Associated Disability: Retrospective Review of an Inpatient Treatment Protocol. *Journal of Pediatric Psychology, 35*(2), 128-137. doi:10.1093/jpepsy/jsp038 | B1 |
| 1. McConnell, K. J., Renfro, S., Chan, B. K., Meath, T. H., Mendelson, A., Cohen, D., . . . Lindrooth, R. C. (2017). Early Performance in Medicaid Accountable Care Organizations: A Comparison of Oregon and Colorado. *JAMA Intern Med, 177*(4), 538-545. doi:10.1001/jamainternmed.2016.9098 | B1 |
| 1. McCracken, L. M. (2006). Toward a Fully Functional, Flexible, and Defused Approach to Pain in Young People. *Cognitive and Behavioral Practice, 13*(3), 182-184. doi:10.1016/j.cbpra.2006.04.001 | B4 |
| 1. McGrath, L. M., Braaten, E. B., Doty, N. D., Willoughby, B. L., Wilson, H. K., O'Donnell, E. H., . . . Doyle, A. E. (2016). Extending the 'cross-disorder' relevance of executive functions to dimensional neuropsychiatric traits in youth. *J Child Psychol Psychiatry, 57*(4), 462-471. doi:10.1111/jcpp.12463 | B1 |
| 1. McNally, J. D., Matheson, L. A., & Rosenberg, A. M. (2009). Epidemiologic Considerations in Unexplained Pediatric Arthralgia: The Role of Season, School, and Stress. *Journal of Rheumatology, 36*(2), 427-433. doi:10.3899/jrheum.080358 | B4 |
| 1. Mehta, M. (1992). Biobehavioral intervention in recurrent headaches in children. *Headache Quarterly, 3*(4), 426-430. | B4 |
| 1. Mehta, S. (2015). Study of various social and demographic variables associated with primary headache disorders in 500 school-going children of central India. *Journal Of Pediatric Neurosciences, 10*(1), 13-17. doi:10.4103/1817-1745.154319 | B1 |
| 1. Mehta, S., Rice, D., McIntyre, A., Getty, H., Speechley, M., Sequeira, K., . . . Teasell, R. W. (2016). Identification and Characterization of Unique Subgroups of Chronic Pain Individuals with Dispositional Personality Traits. *Pain Res Manag, 2016*, 5187631. doi:10.1155/2016/5187631 | A2 |
| 1. Mehta, Z., & Stakiw, D. B. (2004). Childhood vestibular disorders: A tutorial. *Communication Disorders Quarterly, 26*(1), 5-16. doi:10.1177/15257401040260010601 | B1 |
| 1. Meijer, A. M., Habekothe, H. T., & Van Den Wittenboer, G. L. (2000). Time in bed, quality of sleep and school functioning of children. *J Sleep Res, 9*(2), 145-153. | B1 |
| 1. Melloh, M., Aebli, N., Elfering, A., Roder, C., Zweig, T., Barz, T., . . . Theis, J. C. (2008). Development of a screening tool predicting the transition from acute to chronic low back pain for patients in a GP setting: protocol of a multinational prospective cohort study. *BMC Musculoskelet Disord, 9*, 167. doi:10.1186/1471-2474-9-167 | B1 |
| 1. Merikanto, I., Lahti, T., Puusniekka, R., & Partonen, T. (2013). Late bedtimes weaken school performance and predispose adolescents to health hazards. *Sleep Medicine, 14*(11), 1105-1111. doi:10.1016/j.sleep.2013.06.009 | B1 |
| 1. Metz, S. M., Frank, J. L., Reibel, D., Cantrell, T., Sanders, R., & Broderick, P. C. (2013). The Effectiveness of the Learning to BREATHE Program on Adolescent Emotion Regulation. *Research in Human Development, 10*(3), 252-272. doi:10.1080/15427609.2013.818488 | B1 |
| 1. Meulders, A., Karsdorp, P. A., Claes, N., & Vlaeyen, J. W. S. (2015). Comparing Counterconditioning and Extinction as Methods to Reduce Fear of Movement-Related Pain. *J Pain, 16*(12), 1353-1365. doi:10.1016/j.jpain.2015.09.007 | B1 |
| 1. Meulders, A., Vansteenwegen, D., & Vlaeyen, J. W. S. (2011). The acquisition of fear of movement-related pain and associative learning: a novel pain-relevant human fear conditioning paradigm. *Pain, 152*(11), 2460-2469. doi:10.1016/j.pain.2011.05.015 | B1 |
| 1. Meyer de Stadelhofen, F., Plancherel, A.-C., Berthoud, S., & Michel, L. (2003). [Psychological health of students and identification of persons at risk: avoidance of an exam as symptom of depression]. *Sozial- Und Präventivmedizin, 48*(2), 97-104. | B5 |
| 1. Michal, M., Duven, E., Giralt, S., Dreier, M., Müller, K. W., Adler, J., . . . Wölfling, K. (2015). Prevalence and correlates of depersonalization in students aged 12-18 years in Germany. *Social Psychiatry And Psychiatric Epidemiology, 50*(6), 995-1003. doi:10.1007/s00127-014-0957-2 | B1 |
| 1. Michaud, P., Delbos-Piot, I., & Narring, F. (1998). Silent dropouts in health surveys: are nonrespondent absent teenagers different from those who participate in school-based health surveys? *Journal of Adolescent Health, 22*(4), 326-333. | B1 |
| 1. Micieli, G., Frediani, F., Cavallini, A., Rossi, F., Bussone, G., Merli, S., & Nappi, G. (1995). Quantification of headache disability: a diagnostic-based approach. *Headache, 35*(3), 131-137. | A2 |
| 1. Mifflin, K., Chorney, J., & Dick, B. (2016). Attention and Working Memory in Female Adolescents With Chronic Pain and Pain-free Female Adolescents: A Preliminary Pilot Study. *Clinical Journal of Pain, 32*(7), 609-616. doi:10.1097/AJP.0000000000000239 | B1 |
| 1. Miiro, G., Rutakumwa, R., Nakiyingi-Miiro, J., Nakuya, K., Musoke, S., Namakula, J., . . . Weiss, H. A. (2018). Menstrual health and school absenteeism among adolescent girls in Uganda (MENISCUS): a feasibility study. *BMC Women's Health, 18*, 1-13. doi:10.1186/s12905-017-0502-z | B1 |
| 1. Milde-Busch, A., Straube, A., Heinen, F., & Kries, R. (2012). Identified risk factors and adolescents' beliefs about triggers for headaches: results from a cross-sectional study. *Journal of Headache & Pain, 13*(8), 639-643. doi:10.1007/s10194-012-0489-7 | B1 |
| 1. Miller, C. J., Hynd, G. W., & Miller, S. R. (2005). Children with dyslexia: Not necessarily at risk for elevated internalizing symptoms. *Reading and Writing, 18*(5), 425-436. doi:10.1007/s11145-005-4314-4 | B1 |
| 1. Mir, L. (2008). Classroom noise: a stress factor for children? *Environnement Risques & Sante, 7*(1), 5-6. | B5 |
| 1. Miranda, A., & Sood, M. (2006). Treatment options for chronic abdominal pain in children and adolescents. *Current Treatment Options In Gastroenterology, 9*(5), 409-415. | B1 |
| 1. Mirza, H., Zaffar, Q., Hussain, M., Tahir, A., Kaleem, M., Mukhtar, I., . . . Khawar, S. (2015). A Study to Know Association of Backpack Weight and Backache in School Going Girls of Lahore, Pakistan. *Pakistan Journal of Medical & Health Sciences, 9*(1), 161-163. | B1 |
| 1. Mischler, M., & Horstmann, S. (2015). Predicting the Outcome. *Hosp Pediatr, 5*(12), 646-647. doi:10.1542/hpeds.2015-0210 | B2 |
| 1. Modin, B., & Östberg, V. (2009). School climate and psychosomatic health: A multilevel analysis. *School Effectiveness and School Improvement, 20*(4), 433-455. doi:10.1080/09243450903251507 | B1 |
| 1. Mojarro Práxedes, M. D., & Benjumea Pino, P. (1999). Fatiga crónica y neurasthenia en población estudiantil. = Chronic fatigue and neurasthenia in the student population. *Actas Españolas de Psiquiatría, 27*(1), 14-21. | B5 |
| 1. Molina, J., Amaro, E., Jr., da Rocha, L. G. S., Jorge, L., Santos, F. H., & Len, C. A. (2017). Functional resonance magnetic imaging (fMRI) in adolescents with idiopathic musculoskeletal pain: a paradigm of experimental pain. *Pediatr Rheumatol Online J, 15*(1), 81. doi:10.1186/s12969-017-0209-6 | B1 |
| 1. Monfort-Panego, M., Molina-Garcia, J., Minana-Signes, V., Bosch-Bivia, A. H., Gomez-Lopez, A., & Munguia-Izquierdo, D. (2016). Development and psychometric evaluation of a health questionnaire on back care knowledge in daily life physical activities for adolescent students. *Eur Spine J, 25*(9), 2803-2808. doi:10.1007/s00586-016-4627-9 | B1 |
| 1. Monzani, L., Espi-Lopez, G. V., Zurriaga, R., & Andersen, L. L. (2016). Manual therapy for tension-type headache related to quality of work life and work presenteeism: Secondary analysis of a randomized controlled trial. *Complement Ther Med, 25*, 86-91. doi:10.1016/j.ctim.2016.01.008 | A2 |
| 1. Moreno Castellanos, E. (1998). Aspectos estructurales de la identidad sexo–genérica en el niño preescolar. = Structural aspects of gender identity in kindergarten children. *Archivos Hispanoamericanos de Sexología, 4*(2), 307-334. | B5 |
| 1. Morris, S. L., O'Sullivan, P. B., Murray, K. J., Bear, N., Hands, B., & Smith, A. J. (2017). Hypermobility and Musculoskeletal Pain in Adolescents. *J Pediatr, 181*, 213-221.e211. doi:10.1016/j.jpeds.2016.09.060 | B1 |
| 1. Moutran, A. R., Villa, T. R., Diaz, L. A., Noffs, M. H., Pinto, M. M., Gabbai, A. A., & Carvalho Dde, S. (2011). Migraine and cognition in children: a controlled study. *Arq Neuropsiquiatr, 69*(2a), 192-195. | B1 |
| 1. Muller-Schwefe, G., Freytag, A., Hoer, A., Schiffhorst, G., Becker, A., Casser, H. R., . . . Treede, R. D. (2011). Healthcare utilization of back pain patients: results of a claims data analysis. *J Med Econ, 14*(6), 816-823. doi:10.3111/13696998.2011.625067 | A2 |
| 1. Munguía-Izquierdo, D., Legaz-Arrese, A., Moliner-Urdiales, D., & Reverter-Masía, J. (2008). [Neuropsychological performance in patients with fibromyalgia syndrome: relation to pain and anxiety]. *Psicothema, 20*(3), 427-431. | B5 |
| 1. Murberg, T. A. (2012). The influence of optimistic expectations and negative life vents on somatic symptoms among adolescents: A one-year prospective study. *Psychology, 3*(2), 123-127. doi:10.4236/psych.2012.32018 | B1 |
| 1. Murberg, T. A., & Bru, E. *School-Related Stress and Psychosomatic Symptoms Among Norwegian Adolescents* (Vol. 25): Sage Publications, Ltd. | B1 |
| 1. Myrtveit Saether, S. M., Sivertsen, B., Haugland, S., Boe, T., & Hysing, M. (2018). Health complaints in late adolescence; Frequency, factor structure and the association with socio-economic status. *Scand J Public Health, 46*(1), 141-149. doi:10.1177/1403494817711359 | B1 |
| 1. Narbona, J. (2014). Depressive phenomenology at the outset of neuropaediatric diseases. *Revista De Neurologia, 58*, S71-S75. | B5 |
| 1. Narang, M., Shah, D., & Akhtar, H. (2015). Efficacy and Safety of Drotaverine Hydrochloride in Children with Recurrent Abdominal Pain: A Randomized Placebo Controlled Trial. *Indian Pediatr, 52*(10), 847-851. | B1 |
| 1. Nash, J. M., Williams, D. M., Nicholson, R., & Trask, P. C. (2006). The contribution of pain-related anxiety to disability from headache. *J Behav Med, 29*(1), 61-67. doi:10.1007/s10865-005-9033-4 | A2 |
| 1. Natvig, G. K., & Albrektsen, G. School-related Stress and Psychosomatic Symptoms Among School Adolescents. *Journal of School Health, 69*(9), 362. | B1 |
| 1. Nassau, J. H. (2015). Assessment of childhood chronic pain: Focus on functioning. *Brown University Child & Adolescent Behavior Letter, 31*(11), 1-6. doi:10.1002/cbl.30078 | B1 |
| 1. Neblett, R., Hartzell, M. M., Williams, M., Bevers, K. R., Mayer, T. G., & Gatchel, R. J. (2017). Use of the Central Sensitization Inventory (CSI) as a treatment outcome measure for patients with chronic spinal pain disorder in a functional restoration program. *Spine J, 17*(12), 1819-1829. doi:10.1016/j.spinee.2017.06.008 | A2 |
| 1. Newacheck, P. W., McManus, M. A., & Fox, H. B. (1991). Prevalence and impact of chronic illness among adolescents. *Am J Dis Child, 145*(12), 1367-1373. | B1 |
| 1. Newacheck, P. W., & Taylor, W. R. (1992). Childhood chronic illness: prevalence, severity, and impact. *Am J Public Health, 82*(3), 364-371. | B1 |
| 1. Ng, L., Caneiro, J. P., Campbell, A., Smith, A., Burnett, A., & O'Sullivan, P. (2015). Cognitive functional approach to manage low back pain in male adolescent rowers: a randomised controlled trial. *Br J Sports Med, 49*(17), 1125-1131. doi:10.1136/bjsports-2014-093984 | B1 |
| 1. Nielsen, M. B., & Knardahl, S. (2016). The healthy worker effect: Do health problems predict participation rates in, and the results of, a follow-up survey? *Int Arch Occup Environ Health, 89*(2), 231-238. doi:10.1007/s00420-015-1066-6 | A2 |
| 1. Nikendei, C., Zipfel, S., Roth, C., Löwe, B., Herzog, W., & Jünger, J. (2003). Kommunikations- und Interaktionstraining im psychosomatischen Praktikum: Einsatz von standardisierten Patienten. = Communication and Interaction in Psychosomatic Education: Use of Standardized Patients. *PPmP: Psychotherapie Psychosomatik Medizinische Psychologie, 53*(11), 440-445. doi:10.1055/s-2003-43388 | B5 |
| 1. Nikolovski, D., & Saric-Tanaskovic, M. (2006). [Risk factors and health condition of workers in school environment]. *Srp Arh Celok Lek, 134 Suppl 2*, 113-118. | B5 |
| 1. Nissen, G. (2001). [Separation anxiety, school anxiety, depression... Pediatric anxiety disorders have many faces]. *MMW Fortschritte Der Medizin, 143*(5), 26-28. | B5 |
| 1. Noeker, M. (2012). Somatoforme Störungen: Verhaltensmedizinisches Störungsmodell, Diagnostik und Intervention. = Somatoform disorders in childhood and adolescence: Aetiology, assessment and intervention from the perspective of behavioural medicine. *Zeitschrift für Medizinische Psychologie, 21*(3), 100-111. | B5 |
| 1. Noel, M., Alberts, N., Langer, S. L., Levy, R. L., Walker, L. S., & Palermo, T. M. (2016). The Sensitivity to Change and Responsiveness of the Adult Responses to Children's Symptoms in Children and Adolescents With Chronic Pain. *J Pediatr Psychol, 41*(3), 350-362. doi:10.1093/jpepsy/jsv095 | B1 |
| 1. Noel, M., Wilson, A. C., Holley, A. L., Durkin, L., Patton, M., & Palermo, T. M. (2016). Posttraumatic stress disorder symptoms in youth with vs without chronic pain. *Pain, 157*(10), 2277-2284. doi:10.1097/j.pain.0000000000000642 | B1 |
| 1. Nokes, C. (1996). A healthy body and a healthy mind: The relationship between ill-health and cognitive function in school-age children. *Journal of Biosocial Science, 28*(4), 453-462. doi:10.1017/S0021932000022525 | B4 |
| 1. Noll, M., Vieira, A., Darski, C., & Candotti, C. T. (2014). Back schools in Brazil: a review of the intervention methodology, assessment tools, and results. *Revista Brasileira De Reumatologia, 54*(1), 51-58. doi:10.1016/j.rbre.2014.02.007 | B1 |
| 1. Norbye, A. D., Omdal, A. V., Nygaard, M. E., Romild, U., Eldoen, G., & Midgard, R. (2016). Do Patients With Chronic Low Back Pain Benefit From Early Intervention Regarding Absence From Work?: A Randomized, Controlled, Single-Center Pilot Study. *Spine (Phila Pa 1976), 41*(21), E1257-e1264. doi:10.1097/brs.0000000000001878 | A2 |
| 1. Nordlander, E., & Stensota, H. O. (2014). Grades - for Better or Worse? The Interplay of School Performance and Subjective Well-Being Among Boys and Girls. *Child Indicators Research, 7*(4), 861-879. doi:10.1007/s12187-014-9233-y | B1 |
| 1. Novembre, E., Dini, L., Bernardini, R., Resti, M., & Vierucci, A. (1992). [Unusual reactions to food additives]. *La Pediatria Medica E Chirurgica: Medical And Surgical Pediatrics, 14*(1), 39-42. | B5 |
| 1. Oberklaid, F., Amos, D., Liu, C. Y., Jarman, F., Sanson, A., & Prior, M. (1997). ''Growing pains'': Clinical and behavioral correlates in a community sample. *Journal of Developmental and Behavioral Pediatrics, 18*(2), 102-106. doi:10.1097/00004703-199704000-00005 | B4 |
| 1. Odegaard, G., Lindbladh, E., & Hovelius, B. (2003). Children who suffer from headaches--a narrative of insecurity in school and family. *The British Journal Of General Practice: The Journal Of The Royal College Of General Practitioners, 53*(488), 210-213. | B2 |
| 1. Ody, M. (2009). Accompagner l'associativité. = Accompanying the associative process. *Revue Française de Psychosomatique, 35*, 127-142. doi:10.3917/rfps.035.0127 | B5 |
| 1. Oelkers-Ax, R., & Resch, F. (2002). [Headache in children: also a problem for child and adolescent psychiatry? Pathogenesis, comorbidity, therapy]. *Zeitschrift Für Kinder- Und Jugendpsychiatrie Und Psychotherapie, 30*(4), 281-293. | B5 |
| 1. Offenbacher, M., Kohls, N., Walker, L., Hermann, C., Hugle, B., Jager, N., . . . Haas, J. P. (2016). Functional limitations in children and adolescents suffering from chronic pain: validation and psychometric properties of the German Functional Disability Inventory (FDI-G). *Rheumatol Int, 36*(10), 1439-1448. doi:10.1007/s00296-016-3504-5 | B1 |
| 1. Ofovwe, G. E., & Ofili, A. N. (2010). Prevalence and impact of headache and migraine among secondary school students in Nigeria. *Headache: The Journal of Head & Face Pain, 50*(10), 1570-1575. doi:10.1111/j.1526-4610.2010.01776.x | B1 |
| 1. Ohayon, M. M., & Lemoine, P. (2004). Répercussions diurnes de l'insomnie dans la population générale française. = Daytime consequences of insomnia complaints in the French general population. *L'Encéphale: Revue de psychiatrie clinique biologique et thérapeutique, 30*(3), 222-227. doi:10.1016/S0013-7006(04)95433-4 | B5 |
| 1. O'Higgins, S., Doherty, E., NicGabhainn, S., Murphy, A., Hogan, M., O'Neill, C., & McGuire, B. E. (2015). The prevalence, impact and cost of chronic non-cancer pain in Irish primary schoolchildren (PRIME-C): protocol for a longitudinal school-based survey. *BMJ Open, 5*(5), e007426-e007426. doi:10.1136/bmjopen-2014-007426 | B1 |
| 1. Oki, J. (2010). [Care continuity for children with psychosomatic disorders]. *Nihon Rinsho. Japanese Journal Of Clinical Medicine, 68*(1), 97-102. | B5 |
| 1. Olesen, J. (1991). Clinical and pathophysiological observations in migraine and tension-type headache explained by integration of vascular, supraspinal and myofascial inputs. *Pain, 46*(2), 125-132. | A1 |
| 1. Olsen, T. L., Anderson, R. L., Dearwater, S. R., Kriska, A. M., Cauley, J. A., Aaron, D. J., & LaPorte, R. E. (1992). The epidemiology of low back pain in an adolescent population. *Am J Public Health, 82*(4), 606-608. | B1 |
| 1. Orjales Villar, I., & Polaino-Lorente, A. (1992). Déficit de atención selectiva y atención continua en niños con hiperactividad. = Selective and continuous attention deficits in hyperactive children. *Análisis y Modificación de Conducta, 18*(61), 625-645. | B5 |
| 1. Ortiz, R., Ballard, E. D., Machado-Vieira, R., Saligan, L. N., & Walitt, B. (2016). Quantifying the influence of child abuse history on the cardinal symptoms of fibromyalgia. *Clin Exp Rheumatol, 34*(2 Suppl 96), S59-66. | A2 |
| 1. Osborn, S. R., Yu, J., Williams, B., Vasilyadis, M., & Blackmore, C. C. (2017). Changes in Provider Prescribing Patterns After Implementation of an Emergency Department Prescription Opioid Policy. *J Emerg Med, 52*(4), 538-546. doi:10.1016/j.jemermed.2016.07.120 | A2 |
| 1. Osteras, B., Sigmundsson, H., & Haga, M. (2015). Perceived stress and musculoskeletal pain are prevalent and significantly associated in adolescents: an epidemiological cross-sectional study. *BMC Public Health, 15*, 1081. doi:10.1186/s12889-015-2414-x | B1 |
| 1. Osteras, B., Sigmundsson, H., & Haga, M. (2015). Perceived stress and musculoskeletal pain are prevalent and significantly associated in adolescents: an epidemiological cross-sectional study. *BMC Public Health, 15*, 1081. doi:10.1186/s12889-015-2414-x | B1 |
| 1. O'Sullivan, P. B., Beales, D. J., Smith, A. J., & Straker, L. M. (2012). Low back pain in 17 year olds has substantial impact and represents an important public health disorder: a cross-sectional study. *BMC Public Health, 12*, 100-100. doi:10.1186/1471-2458-12-100 | B1 |
| 1. Ottova, V., Erhart, M., Vollebergh, W., Kokonyei, G., Morgan, A., Gobina, I., . . . Positive Hlth Focus, G. (2012). The Role of Individual- and Macro-Level Social Determinants on Young Adolescents' Psychosomatic Complaints. *Journal of Early Adolescence, 32*(1), 126-158. doi:10.1177/0272431611419510 | B1 |
| 1. Overmeer, T., & Boersma, K. (2016). What Messages Do Patients Remember? Relationships Among Patients' Perceptions of Physical Therapists' Messages, Patient Characteristics, Satisfaction, and Outcome. *Phys Ther, 96*(3), 275-283. doi:10.2522/ptj.20140557 | A2 |
| 1. Overmeyer, S., Blanz, B., Schmidt, M. H., Rose, F., & Schmidbauer, M. (1995). [School refusal--a catamnestic study on the diagnostic concept ov "school phobia" and "school anxiety"]. *Zeitschrift Für Kinder- Und Jugendpsychiatrie, 23*(1), 35-43. | B5 |
| 1. Owens, M., Sawchuk, N., & Harbeck-Weber, C. (2018). (342) - Disruption of school attendance among adolescents/young adults with POTS and chronic pain. *Journal of Pain, 19*, S108-S108. doi:10.1016/j.jpain.2017.12.257 | B2 |
| 1. Ozdemir, G., Aygul, R., Demir, R., Ozel, L., Ertekin, A., & Ulvi, H. (2014). Migraine prevalence, disability, and sociodemographic properties in the eastern region of Turkey: a population-based door-to-door survey. *Turk J Med Sci, 44*(4), 624-629. | B1 |
| 1. Padilla‐Moledo, C., Ruiz, J. R., & Castro‐Piñero, J. (2016). Parental educational level and psychological positive health and health complaints in Spanish children and adolescents. *Child: Care, Health & Development, 42*(4), 534-543. doi:10.1111/cch.12342 | B1 |
| 1. Padilla-Moledo, C., Ruiz, J. R., Ortega, F. B., Mora, J., & Castro-Piñero, J. (2012). Associations of muscular fitness with psychological positive health, health complaints, and health risk behaviors in Spanish children and adolescents. *Journal Of Strength And Conditioning Research / National Strength & Conditioning Association, 26*(1), 167-173. doi:10.1519/JSC.0b013e31821c2433 | B1 |
| 1. Paiva, T., Gaspar, T., & Matos, M. G. (2015). Sleep deprivation in adolescents: correlations with health complaints and health-related quality of life. *Sleep Medicine, 16*(4), 521-527. doi:10.1016/j.sleep.2014.10.010 | B1 |
| 1. Pakalnis, A. (2002). Current therapies for prophylaxis of pediatric migraine. *Expert Review Of Neurotherapeutics, 2*(4), 555-559. doi:10.1586/14737175.2.4.555 | B1 |
| 1. Pakalnis, A. (2007). Preventive therapies of pediatric migraine. *Drug Development Research, 68*(6), 350-354. doi:10.1002/ddr.20200 | B1 |
| 1. Pakalnis, A., Butz, C., Splaingard, D., Donna, K., & Fong, J. (2007). Emotional problems and prevalence of medication overuse in pediatric chronic daily headache. *Journal of Child Neurology, 22*(12), 1356-1359. doi:10.1177/0883073807307090 | B1 |
| 1. Palermo, T. M. (2000). Impact of recurrent and chronic pain on child and family daily functioning: A critical review of the literature. *Journal of Developmental and Behavioral Pediatrics, 21*(1), 58-69. doi:10.1097/00004703-200002000-00007 | B2 |
| 1. Palermo, T. M., Law, E. F., Fales, J., Bromberg, M. H., Jessen-Fiddick, T., & Tai, G. (2016). Internet-delivered cognitive-behavioral treatment for adolescents with chronic pain and their parents: a randomized controlled multicenter trial. *Pain, 157*(1), 174-185. doi:10.1097/j.pain.0000000000000348 | B1 |
| 1. Pant, C., Deshpande, A., Sferra, T. J., & Olyaee, M. (2017). Emergency department visits related to functional abdominal pain in the pediatric age group. *J Investig Med, 65*(4), 803-806. doi:10.1136/jim-2016-000300 | B1 |
| 1. Parisi, P., Verrotti, A., Paolino, M. C., Urbano, A., Bernabucci, M., Castaldo, R., & Villa, M. P. (2010). Headache and cognitive profile in children: A cross-sectional controlled study. *The Journal of Headache and Pain, 11*(1), 45-51. doi:10.1007/s10194-009-0165-8 | B1 |
| 1. Park, Y.-J., Han, K.-S., Shin, H. J., Kang, H.-C., Chun, S.-H., Moon, S.-H., . . . Kim, H.-S. (2004). [Prediction on the negative outcomes of anger in female adolescents]. *Taehan Kanho Hakhoe Chi, 34*(1), 172-181. | B5 |
| 1. Parker, W. D., Portešová, S., & Stumpf, H. (2001). Perfectionism in mathematically gifted and typical Czech students. *Journal for the Education of the Gifted, 25*(2), 138-152. | A3 |
| 1. Parra, J. (2006). [Controversies and problems in the diagnosis of benign occipital epilepsies in infancy, childhood and adolescence]. *Revista De Neurologia, 43 Suppl 1*, S51-S56. | B5 |
| 1. Passchier, J., Van den Bree, M. B. M., Emmen, H. H., Osterhaus, S. O., Orlebeke, J. F., & Verhage, F. (1990). Relaxation training in school classes does not reduce headache complaints. *Headache: The Journal of Head and Face Pain, 30*(10), 660-664. doi:10.1111/j.1526-4610.1990.hed3010660.x | B1 |
| 1. Patel, D. I., Winkler, P., Botello, J., Villarreal, J., & Puga, F. (2016). The citizen scientist: Community-academic partnerships through Translational Advisory Boards. *Patient Educ Couns, 99*(12), 2087-2090. doi:10.1016/j.pec.2016.07.013 | B1 |
| 1. Patil, S., Willett, O., Thompkins, T., Hermann, R., Ramanathan, S., Cornett, E. M., . . . Kaye, A. D. (2016). Botulinum Toxin: Pharmacology and Therapeutic Roles in Pain States. *Curr Pain Headache Rep, 20*(3), 15. doi:10.1007/s11916-016-0545-0 | B2 |
| 1. Pavletic, A. C. (2011). Connecting With Frequent Adolescent Visitors to the School Nurse Through the Use of Intentional Interviewing. *Journal of School Nursing (Sage Publications Inc.), 27*(4), 258-268. doi:10.1177/1059840511399289 | B1 |
| 1. Pedreira Massa, J. L., Martín Martínez de Toda, P., & Fernańdez Villar, A. (1994). Experiencias asistenciales en Psiquiatría Infantil:la etapa escolar y sus perfiles evolutivos y psicopatológicos. = Assistential experience in child and adolescent psychiatry: Developmental and psychopathological profiles in school age. *Revista de Psiquiatría Infanto-Juvenil, 3*, 152-161. | B5 |
| 1. Pelkonen, M., Marttunen, M., & Aro, H. (2003). Risk for depression: a 6-year follow-up of Finnish adolescents. *Journal Of Affective Disorders, 77*(1), 41-51. doi:10.1016/s0165-0327(02)00098-8 | *B1* |
| 1. Pelletier, H. (2017). Headaches: Breaking the pain cycle with a behavioral rehabilitation model of treatment. *Brown University Child & Adolescent Behavior Letter, 33*(5), 1-6. doi:10.1002/cbl.30210 | *B2* |
| 1. Pellicer-Porcar, O., Mirete-Fructuoso, M., Molina-Rodriguez, S., & Soto-Amaya, J. (2014). [Subjective memory complaints in young adults: the influence of the emotional state]. *Rev Neurol, 59*(12), 543-550. | B5 |
| 1. Pelsser, R. (1991). La méthode des cas dans l'apprentissage de la relation patient-médecin. = Discussion of clinical cases in doctor-patient relationship training. *Psychologie Medicale, 23*(6), 615-617. | B5 |
| 1. Pennington, N., Johnson, M., Delaney, E., & Blankenship, M. B. (2010). Energy Drinks: A New Health Hazard for Adolescents. *Journal of School Nursing (Sage Publications Inc.), 26*(5), 352-359. doi:10.1177/1059840510374188 | B1 |
| 1. Pérez-Alvarez, F., & Timoneda, C. (1999). [Cognition, emotion, and behavior. Neuropsychosomatisms and non-neurological paroxysms]. *Revista De Neurologia, 29*(1), 26-33. | B5 |
| 1. Perquin, C. W., Hunfeld, J. A. M., Hazebroek-Kampschreur, A. A. J. M., van Suijlekom-Smit, L. W. A., Passchier, J., Koes, B. W., & van der Wouden, J. C. (2001). Insights in the use of health care services in chronic benign pain in childhood and adolescence. *Pain, 94*(2), 205-213. doi:10.1016/S0304-3959(01)00355-4 | B5 |
| 1. Peters, P. A., Huisman, J., & van Emmerik-Levelt, H. M. (1999). Gedragsproblemen en emotionele problemen bij kinderen in het Mytyl- en Tyltylonderwijs. = Behavioral and emotional problems in children at schools for physically handicapped children and for multiply handicapped children. *Kind en Adolescent, 20*(1), 44-51. doi:10.1007/BF03060723 | B5 |
| 1. Petersen, S., Hagglof, B. L., & Bergstrom, E. I. (2009). Impaired health-related quality of life in children with recurrent pain. *Pediatrics, 124*(4), e759-767. doi:10.1542/peds.2008-1546 | B1 |
| 1. Peterson, B. B. (2002). School injury trends. *The Journal of School Nursing, 18*(4), 219-225. | B1 |
| 1. Petiton, Y. (2010). [Disable and sick children, suffering families: from helplessness to humility, from fate to the unexpected solution]. *Archives De Pédiatrie: Organe Officiel De La Sociéte Française De Pédiatrie, 17*(6), 934-935. doi:10.1016/S0929-693X(10)70186-X | B5 |
| 1. Petrusic, I., Pavlovski, V., Savkovic, Z., Vucinic, D., Filipovic, B., & Jancic, J. (2017). Addenbrooke's cognitive examination test for brief cognitive assessment of adolescents suffering from migraine with aura. *Acta Neurol Belg, 117*(1), 97-102. doi:10.1007/s13760-016-0655-9 | B1 |
| 1. Pickett, W., Berg, R. L., & Marlenga, B. (2018). Health and Well‐Being Among Young People From Canadian Farms: Associations With a Culture of Risk‐Taking. *Journal of Rural Health, 34*(3), 275-282. doi:10.1111/jrh.12281 | B1 |
| 1. Pikó, B., & Noémi, K. (2006). [Psychosomatic symptom formation as a health status indicator in early adolescence: behavioral epidemiologic analysis]. *Orvosi Hetilap, 147*(18), 819-825. | B5 |
| 1. Piko, B. F. (2007). Self-perceived health among adolescents: the role of gender and psychosocial factors. *European Journal Of Pediatrics, 166*(7), 701-708. | B1 |
| 1. Piko, B. F., & Keresztes, N. (2007). Self-perceived health among early adolescents: role of psychosocial factors. *Pediatrics International: Official Journal Of The Japan Pediatric Society, 49*(5), 577-583. | B1 |
| 1. Pimenta, C. A., Teixeira, M. J., Simões, P., Simões, C., da Cruz, D. d. A., & Okada, M. (1998). [League against pain: a teaching experience]. *Revista Do Hospital Das Clínicas, 53*(4), 214-221. | B5 |
| 1. Pinquart, M., & Teubert, D. (2012). Academic, physical, and social functioning of children and adolescents with chronic physical illness: A meta-analysis. *Journal of Pediatric Psychology, 37*(4), 376-389. doi:10.1093/jpepsy/jsr106 | A4 |
| 1. Pirnat, J., & Skela Savic, B. (2013). Effects of internet use on youth health and challenges for health education in primary health care [Slovene]. *Obzornik Zdravstvene Nege, 47*(4), 309-316. | B5 |
| 1. Plante, W. A. (2007). Anxiety, somatic symptoms and school refusal in children and adolescents. *Brown University Child & Adolescent Behavior Letter, 23*(12), 1. | A3 |
| 1. Plaza, M. (1992). L'enfant, le dessin et la consultation psychologique. = The child, drawing, and the psychological consultation. *Bulletin de Psychologie, 45*(406), 456-461. | B5 |
| 1. Plioplys, S., Doss, J., Siddarth, P., Bursch, B., Falcone, T., Forgey, M., . . . Caplan, R. (2014). A multisite controlled study of risk factors in pediatric psychogenic nonepileptic seizures. *Epilepsia, 55*(11), 1739-1747. doi:10.1111/epi.12773 | A4 |
| 1. Pollard, K. L., Campbell, C., Squires, M., Palsson, O., & van Tilburg, M. A. L. (2018). Seasonal Association of Pediatric Functional Abdominal Pain Disorders and Anxiety. *Journal Of Pediatric Gastroenterology And Nutrition, 67*(1), 18-22. doi:10.1097/MPG.0000000000001886 | B1 |
| 1. Pop-Jordanova, N., & Zorcec, T. (2009). Psychological assessment and biofeedback mitigation of tension-type headaches in children. *Prilozi / Makedonska Akademija Na Naukite I Umetnostite, Oddelenie Za Biološki I Medicinski Nauki = Contributions / Macedonian Academy Of Sciences And Arts, Section Of Biological And Medical Sciences, 30*(1), 155-166. | B1 |
| 1. Portenoy, R. K., Ugarte, C., Fuller, I., & Haas, G. (2004). Population-based survey of pain in the United States: differences among white, African American, and Hispanic subjects. *Journal of Pain, 5*(6), 317-328. | A3 |
| 1. Powers, S. W., Patton, S. R., Hommel, K. A., & Hershey, A. D. (2003). Quality of life in childhood migraines: clinical impact and comparison to other chronic illnesses. *Pediatrics, 112*(1 Pt 1), e1-5. | B1 |
| 1. Powers, S. W., Patton, S. R., Hommel, K. A., & Hershey, A. D. (2003). Quality of life in childhood migraines: clinical impact and comparison to other chronic illnesses. *Pediatrics, 112*(1 Pt 1), e1-e5. | B1 |
| 1. Powers, S. W., Patton, S. R., Hommel, K. A., & Hershey, A. D. (2004). Quality of life in paediatric migraine: characterization of age-related effects using PedsQL 4.0. *Cephalalgia: An International Journal Of Headache, 24*(2), 120-127. | B1 |
| 1. Prajsner, B., Gergont, A., & Kaciński, M. (2004). [Psychological characteristics of children and adolescents with primary headache]. *Przegla̧d Lekarski, 61*(11), 1228-1234. | B5 |
| 1. Prior, K. N., & Bond, M. J. (2017). Patterns of 'Abnormal' Illness Behavior among Healthy Individuals. *Am J Health Behav, 41*(2), 139-146. doi:10.5993/ajhb.41.2.4 | A2 |
| 1. Puskar, K. R., Sereika, S. M., & Haller, L. L. (2003). Anxiety, somatic complaints, and depressive symptoms in rural adolescents. *Journal of Child & Adolescent Psychiatric Nursing, 16*(3), 102-111. | B1 |
| 1. Puura, K., Almqvist, F., Tamminen, T., Piha, J., Kumpulainen, K., Räsänen, E., . . . Koivisto, A. M. (1998). Children with symptoms of depression--what do the adults see? *Journal Of Child Psychology And Psychiatry, And Allied Disciplines, 39*(4), 577-585. | B1 |
| 1. Rabbitts, J. A., Holley, A. L., Groenewald, C. B., & Palermo, T. M. (2016). Association Between Widespread Pain Scores and Functional Impairment and Health-Related Quality of Life in Clinical Samples of Children. *J Pain, 17*(6), 678-684. doi:10.1016/j.jpain.2016.02.005 | B1 |
| 1. Rabey, M., Slater, H., O'Sullivan, P., Beales, D., & Smith, A. (2015). Somatosensory nociceptive characteristics differentiate subgroups in people with chronic low back pain: a cluster analysis. *Pain, 156*(10), 1874-1884. doi:10.1097/j.pain.0000000000000244 | A2 |
| 1. Ralić, A. Ž., & Cvitković, D. (2011). Razlike u procjenama adaptivnoga ponašanja djece s teškoćama u školskom okruženju. = Differences in estimations of children's specific adaptive behaviour from perspectives of children, parents and teachers. *Hrvatska Revija Za Rehabilitacijska Istraživanja, 47*(2), 109-127. | B5 |
| 1. Randall, E. T., Smith, K. R., Conroy, C., Smith, A. M., Sethna, N., & Logan, D. E. (2018). Back to Living: Long Term Functional Status of Pediatric Patients Who Completed Intensive Interdisciplinary Pain Treatment. *The Clinical Journal Of Pain*. doi:10.1097/AJP.0000000000000616 | B1 |
| 1. Rani, A., Sharma, M. K., & Singh, A. (2016). Practices and perceptions of adolescent girls regarding the impact of dysmenorrhea on their routine life: a comparative study in the urban, rural, and slum areas of Chandigarh. *International Journal Of Adolescent Medicine And Health, 28*(1), 3-9. doi:10.1515/ijamh-2014-0063 | B1 |
| 1. Ramage-Morin, P. L., & Gilmour, H. (2010). Chronic pain at ages 12 to 44. *Health Reports, 21*(4), 53-61. | B1 |
| 1. Ramberg, B. K., & Diseth, T. H. (2012). Barn med langvarig smerte: Fanget i vonde sirkler-veier ut. = Children with chronic pain: Caught in a vicious circle—Ways to break out. *Tidsskrift for Norsk Psykologforening, 49*(3), 241-246. | B5 |
| 1. Ramirez, S. M., Puig, J. M. I., Sanchez, J. A. Y., & Sanchez, C. (1999). Migraine headaches and its relationship to depression and anxiety. *Revista Mexicana De Psicologia, 16*(2), 245-251. | B5 |
| 1. Rashid-Tavalai, Z., Bakhshani, N.-M., Amirifard, H., & Lashkaripour, M. (2015). Effectiveness of Combined Copying Skills Training and Pharmacological Therapy for Patients with Migraine. *Global Journal Of Health Science, 8*(6), 179-186. doi:10.5539/gjhs.v8n6p179 | A2 |
| 1. Rashiq, S., & Dick, B. D. (2009). Factors associated with chronic noncancer pain in the Canadian population. *Pain Research & Management: The Journal Of The Canadian Pain Society = Journal De La Société Canadienne Pour Le Traitement De La Douleur, 14*(6), 454-460. | A3 |
| 1. Rasmussen, B. K. (1993). Migraine and tension-type headache in a general population: precipitating factors, female hormones, sleep pattern and relation to lifestyle. *Pain, 53*(1), 65-72. | A2 |
| 1. Rasmussen, B. K. (1996). Migraine and tension-type headache are separate disorders. *Cephalalgia, 16*(4), 217-220; discussion 223. | B2 |
| 1. Rathleff, M. S., Rathleff, C. R., Olesen, J. L., Rasmussen, S., & Roos, E. M. (2016). Is Knee Pain During Adolescence a Self-limiting Condition? Prognosis of Patellofemoral Pain and Other Types of Knee Pain. *Am J Sports Med, 44*(5), 1165-1171. doi:10.1177/0363546515622456 | B1 |
| 1. Ravens-Sieberer, U., Ellert, U., & Erhart, M. (2007). [Health-related quality of life of children and adolescents in Germany. Norm data from the German Health Interview and Examination Survey (KiGGS)]. *Bundesgesundheitsblatt, Gesundheitsforschung, Gesundheitsschutz, 50*(5-6), 810-818. | B5 |
| 1. Ravens-Sieberer, U., Freeman, J., Kokonyei, G., Thomas, C. A., & Erhart, M. (2009). School as a Determinant for Health Outcomes--A Structural Equation Model Analysis. *Health Education, 109*(4), 342-356. | B1 |
| 1. Ravid, S., Gordon, S., Schiff, A., & Shahar, E. (2013). Headache in children: young age at onset does not imply a harmful etiology or predict a harsh headache disability. *Journal Of Child Neurology, 28*(7), 857-862. doi:10.1177/0883073812452788 | B3 |
| 1. Rebbeck, T., Moloney, N., Azoory, R., Hubscher, M., Waller, R., Gibbons, R., & Beales, D. (2015). Clinical Ratings of Pain Sensitivity Correlate With Quantitative Measures in People With Chronic Neck Pain and Healthy Controls: Cross-Sectional Study. *Phys Ther, 95*(11), 1536-1546. doi:10.2522/ptj.20140352 | A2 |
| 1. Reid, K., Hartling, L., Ali, S., Le, A., Norris, A., & Scott, S. D. (2017). Development and Usability Evaluation of an Art and Narrative-Based Knowledge Translation Tool for Parents With a Child With Pediatric Chronic Pain: Multi-Method Study. *J Med Internet Res, 19*(12), e412. doi:10.2196/jmir.8877 | B1 |
| 1. Reid, K., Simmonds, M., Verrier, M., & Dick, B. (2016). Supporting Teens with Chronic Pain to Obtain High School Credits: Chronic Pain 35 in Alberta. *Children (Basel, Switzerland), 3*(4). | B1 |
| 1. Renshaw, T. L., & Cohen, A. S. (2014). Life Satisfaction as a Distinguishing Indicator of College Student Functioning: Further Validation of the Two-Continua Model of Mental Health. *Social Indicators Research, 117*(1), 319-334. doi:10.1007/s11205-013-0342-7 | A2 |
| 1. Reynolds, M., Brewin, C. R., & Saxton, M. (2000). Emotional disclosure in school children. *Journal of Child Psychology and Psychiatry, 41*(2), 151-159. doi:10.1017/S0021963099005223 | B1 |
| 1. Ribbeck, M. R. (2006). Getting ready for certification: pediatric urology, advanced practice, and acute scrotal pain. *Urologic Nursing, 26*(2), 149-149. | A3 |
| 1. Richards, K. V., Beales, D. J., Smith, A. J., O'Sullivan, P. B., & Straker, L. M. (2016). Neck Posture Clusters and Their Association With Biopsychosocial Factors and Neck Pain in Australian Adolescents. *Phys Ther, 96*(10), 1576-1587. doi:10.2522/ptj.20150660 | B1 |
| 1. Richardson, M. G. (2008). The patient pain experience: an innovative student curriculum. *Medical Education, 42*(11), 1128-1128. doi:10.1111/j.1365-2923.2008.03218.x | B4 |
| 1. Riva, D., Usilla, A., Aggio, F., Vago, C., Treccani, C., & Bulgheroni, S. (2012). Attention in Children and Adolescents With Headache. *Headache: The Journal of Head & Face Pain, 52*(3), 374-384. doi:10.1111/j.1526-4610.2011.02033.x | B1 |
| 1. Roberts, M. B., & Drummond, P. D. (2016). Sleep Problems are Associated With Chronic Pain Over and Above Mutual Associations With Depression and Catastrophizing. *Clin J Pain, 32*(9), 792-799. doi:10.1097/ajp.0000000000000329 | B1 |
| 1. Rocha, P. A. S., & Hershey, A. D. (2017). Pediatric Migraine Disability Assessment (PedMIDAS): Translation Into Brazilian Portuguese and Cross-Cultural Adaptation. *Headache, 57*(9), 1409-1415. doi:10.1111/head.13159 | B1 |
| 1. Roddy, E., Jordan, K. P., Oppong, R., Chen, Y., Jowett, S., Dawes, P., . . . Hay, E. M. (2016). Reconsultation, self-reported health status and costs following treatment at a musculoskeletal Clinical Assessment and Treatment Service (CATS): a 12-month prospective cohort study. *BMJ Open, 6*(10), e011735. doi:10.1136/bmjopen-2016-011735 | A2 |
| 1. Rogachov, A., Cheng, J. C., Erpelding, N., Hemington, K. S., Crawley, A. P., & Davis, K. D. (2016). Regional brain signal variability: a novel indicator of pain sensitivity and coping. *Pain, 157*(11), 2483-2492. doi:10.1097/j.pain.0000000000000665 | A2 |
| 1. Rolin-Gilman, C., Fournier, B., & Cleverley, K. (2017). Implementing Best Practice Guidelines in Pain Assessment and Management on a Women's Psychiatric Inpatient Unit: Exploring Patients' Perceptions. *Pain Manag Nurs, 18*(3), 170-178. doi:10.1016/j.pmn.2017.03.002 | A2 |
| 1. Romer, B., Largo, R. H., Holtz, S., & Kunz, A. (2002). Risks of developmental dissociations. *Monatsschrift Kinderheilkunde, 150*(2), 201-206. doi:10.1007/s001120100267 | B5 |
| 1. Ross, G. B., Sheahan, P. J., Mahoney, B., Gurd, B. J., Hodges, P. W., & Graham, R. B. (2017). Pain catastrophizing moderates changes in spinal control in response to noxiously induced low back pain. *J Biomech, 58*, 64-70. doi:10.1016/j.jbiomech.2017.04.010 | A3 |
| 1. Roth-Isigkeit, A., Thyen, U., Stöven, H., Schwarzenberger, J., & Schmucker, P. (2005). Pain among children and adolescents: restrictions in daily living and triggering factors. *Pediatrics, 115*(2), e152-e162. | B1 |
| 1. Rothner, A. D., Linder, S. L., Wasiewski, W. W., & O'Neill, K. M. (2001). Chronic nonprogressive headaches in children and adolescents. *Semin Pediatr Neurol, 8*(1), 34-39. | B1 |
| 1. Roulstone, A. (2006). Review of The education and employment of disabled young people: Frustrated ambition. *Disability & Society, 21*(3), 294-296. | B4 |
| 1. Rousseau-Salvador, C., Amouroux, R., Annequin, D., Salvador, A., Tourniaire, B., & Rusinek, S. (2014). Anxiety, depression and school absenteeism in youth with chronic or episodic headache. *Pain Research & Management: The Journal Of The Canadian Pain Society = Journal De La Société Canadienne Pour Le Traitement De La Douleur, 19*(5), 235-240. | B1 |
| 1. Rousseau-Salvador, C., Amouroux, R., Gooze, R., Salvador, A., Tourniaire, B., Rusinek, S., & Annequin, D. (2013). Risk factors of anxiety and depression in children and adolescents with headache: A cross-sectional study. *European Review of Applied Psychology-Revue Europeenne De Psychologie Appliquee, 63*(5), 295-302. doi:10.1016/j.erap.2013.07.005 | B1 |
| 1. Rudolph, C. D., & Miranda, A. (2004). Treatment options for functional abdominal pain. *Pediatric Annals, 33*(2), 105-112. | B2 |
| 1. Rutten, J. M., Reitsma, J. B., Vlieger, A. M., & Benninga, M. A. (2013). Gut-directed hypnotherapy for functional abdominal pain or irritable bowel syndrome in children: a systematic review. *Arch Dis Child, 98*(4), 252-257. doi:10.1136/archdischild-2012-302906 | B1 |
| 1. Ryde, P. (2006). Medfødt toxoplasmose. = Congenital Toxoplasmosis. *Psykologisk Paedagogisk Rådgivning, 43*(4), 321-332. | B5 |
| 1. Saltychev, M., Mattie, R., McCormick, Z., & Laimi, K. (2017). Confirmatory factor analysis of 12-Item World Health Organization Disability Assessment Schedule in patients with musculoskeletal pain conditions. *Clin Rehabil, 31*(5), 702-709. doi:10.1177/0269215516652930 | A2 |
| 1. Sanders, K. Y. (2006). Overprotection and lowered expectations of persons with disabilities: The unforeseen consequences. *Work: Journal of Prevention, Assessment & Rehabilitation, 27*(2), 181-188. | B1 |
| 1. Sanders, M. R., Morrison, M., Rebgetz, M., & Bor, W. (1990). Behavioural treatment of childhood recurrent abdominal pain: Relationships between pain, children's psychological characteristics and family functioning. *Behaviour Change, 7*(1), 16-24. | B1 |
| 1. Sanford, M. N., Offord, D. R., Boyle, M. H., Peace, A., & Racine, Y. A. (1992). Ontario child health study: social and school impairments in children aged 6 to 16 years. *Journal Of The American Academy Of Child And Adolescent Psychiatry, 31*(1), 60-67. | B1 |
| 1. Sanson, A., Smart, D., Prior, M., & Oberklaid, F. (1993). Precursors of hyperactivity and aggression. *Journal of the American Academy of Child & Adolescent Psychiatry, 32*(6), 1207-1216. doi:10.1097/00004583-199311000-00014 | B1 |
| 1. Santos-Lasaosa, S., Viloria-Alebesque, A., Morandeira-Rivas, C., Lopez Del Val, L. J., Bellosta-Diago, E., & Velazquez-Benito, A. (2013). [Mnemonic complaints and chronic migraine]. *Revista De Neurologia, 57*(4), 145-149. | B5 |
| 1. Santos, T., de Matos, M. G., Simões, C., & Machado, M. d. C. (2015). Psychological well-being and chronic condition in Portuguese adolescents. *International Journal of Adolescence and Youth, 20*(3), 334-345. doi:10.1080/02673843.2015.1007880 | B1 |
| 1. Sanya, E. O., Desalu, O. O., Aderibigbe, S. A., Kolo, P. M., Mustapha, A. F., & Adeyanju, O. A. (2017). Prevalence and clinical characteristics of headaches among undergraduate students in three tertiary institutions in Ilorin, Nigeria. *Niger J Clin Pract, 20*(11), 1411-1416. doi:10.4103/njcp.njcp_383_16 | A2 |
| 1. Saps, M., Seshadri, R., Stainberg, M., Schaffer, G., Marshall, B. M., & Di Lorenzo, C. (2009). A Prospective School-based Study of Abdominal Pain and Other Common Somatic Complaints in Children. *Journal of Pediatrics, 154*(3), 322-326. doi:10.1016/j.jpeds.2008.09.047 | B1 |
| 1. Saps, M., Sztainberg, M., & Di Lorenzo, C. (2006). A prospective community-based study of gastroenterological symptoms in school-age children. *Journal Of Pediatric Gastroenterology And Nutrition, 43*(4), 477-482. | B1 |
| 1. Saps, M., Velasco-Benitez, C. A., Blom, P. J. J., Benninga, M. A., & Nichols-Vinueza, D. X. (2018). Prospective Study of Gastrointestinal Symptoms in School Children of South America. *Journal Of Pediatric Gastroenterology And Nutrition, 66*(3), 391-394. doi:10.1097/MPG.0000000000001720 | B1 |
| 1. Saps, M., Mintjens, S., Pusatcioglu, C. K., Cohen, D. M., & Sternberg, P. (2017). Clinical Presentation of Acute Gastroenteritis in Children With Functional Abdominal Pain Disorders. *Journal Of Pediatric Gastroenterology And Nutrition, 65*(2), 165-167. doi:10.1097/MPG.0000000000001466 | B1 |
| 1. Sardinero García, E., & Pedreira Massa, J. L. (1995). Características del maltrato en la edad escolar. = Characteristics of the maltreatment of school-age children. *Psiquis: Revista de Psiquiatría, Psicología y Psicosomática, 16*(1), 41-50. | B5 |
| 1. Sato, A. F., Hainsworth, K. R., Khan, K. A., Ladwig, R. J., Weisman, S. J., & Davies, W. H. (2007). School absenteeism in pediatric chronic pain: identifying lessons learned from the general school absenteeism literature. *Children's Health Care, 36*(4), 355-372. | B2 |
| 1. Satz, P. (2001). Mild head injury in children and adolescents. *Current Directions in Psychological Science, 10*(3), 106-109. doi:10.1111/1467-8721.00127 | A3 |
| 1. Saul, R., Peters, J., & Bruce, E. (2016). Assessing acute and chronic pain in children and young people. *Nurs Stand, 31*(10), 51-63. doi:10.7748/ns.2016.e10549 | B2 |
| 1. Scheller, J. M. (1995). The history, epidemiology, and classification of headaches in childhood. *Semin Pediatr Neurol, 2*(2), 102-108. | B1 |
| 1. Schiemann-Delgado, J., Yang, H., de la Loge, C., Stalvey, T. J., Jones, J., LeGoff, D., & Mintz, M. (2012). A long-term open-label extension study assessing cognition and behavior, tolerability, safety, and efficacy of adjunctive levetiracetam in children aged 4 to 16 years with partial-onset seizures. *Journal of Child Neurology, 27*(1), 80-89. doi:10.1177/0883073811417183 | A4 |
| 1. Schmelzer, A. C., Salt, E., Wiggins, A., Crofford, L. J., Bush, H., & Mannino, D. M. (2016). Role of Stress and Smoking as Modifiable Risk Factors for Nonpersistent and Persistent Back Pain in Women. *Clinical Journal of Pain, 32*(3), 232-237. doi:10.1097/AJP.0000000000000245 | A2 |
| 1. Schodt, T., Sorensen, H. T., Schiottz-Christensen, B., Hansen, V. K., & Nielsen, G. L. (1995). Acute low back pain: is the number of patients taking sick leave exponentially related to time? *Scand J Prim Health Care, 13*(3), 238-239. | A2 |
| 1. Schoemaker, M. M., Lingam, R., Jongmans, M. J., van Heuvelen, M. J. G., & Emond, A. (2013). Is severity of motor coordination difficulties related to co-morbidity in children at risk for developmental coordination disorder? *Research in Developmental Disabilities, 34*(10), 3084-3091. doi:10.1016/j.ridd.2013.06.028 | B1 |
| 1. Schoeni, A., Roser, K., & Röösli, M. (2015). Symptoms and Cognitive Functions in Adolescents in Relation to Mobile Phone Use during Night. *PLoS One, 10*(7), e0133528-e0133528. doi:10.1371/journal.pone.0133528 | B1 |
| 1. Schoth, D. E., Ma, Y., & Liossi, C. (2015). Exploring attentional bias for real-world, pain-related information in chronic musculoskeletal pain using a novel change detection paradigm. *Clin J Pain, 31*(8), 680-688. doi:10.1097/ajp.0000000000000149 | A2 |
| 1. Schrooten, M. G., Karsdorp, P. A., & Vlaeyen, J. W. (2013). Pain catastrophizing moderates the effects of pain-contingent task interruptions. *Eur J Pain, 17*(7), 1082-1092. doi:10.1002/j.1532-2149.2012.00276.x | A2 |
| 1. Schrooten, M. G., Vancleef, L., & Vlaeyen, J. W. (2015). Attention allocation to ambiguous health/somatic threat cues. *Eur J Pain, 19*(7), 1002-1011. doi:10.1002/ejp.628 | B1 |
| 1. Scott, L. D., & McCoy, H. (2015). Negative Social Contextual Stressors and Somatic Symptoms Among Young Black Males: An Exploratory Study. *Journal of Human Behavior in the Social Environment, 25*(8), 885-896. doi:10.1080/10911359.2015.1039155 | B1 |
| 1. Sedlic, M., Mahovic, D., & Kruzliak, P. (2016). Epidemiology of Primary Headaches Among 1,876 Adolescents: A Cross-Sectional Survey. *Pain Med, 17*(2), 353-359. doi:10.1093/pm/pnv033 | B3 |
| 1. Sehgal, S. K., Nijhawan, A., Nijhawan, M., Singh, R. P., Agarwal, R., & Sardana, P. (2016). TO STUDY THE SLEEP HABITS AND PREVALENCE OF SLEEP DISORDERS IN THE ADOLESCENT AND ADULT PARAMEDICAL PERSONNEL - A QUESTIONNAIRE-BASED STUDY. *Journal of Evolution of Medical and Dental Sciences-Jemds, 5*(87), 6501-6507. doi:10.14260/jemds/2016/1470 | B1 |
| 1. Sekhar, S. C., Gollapalli, S. K., Prasad, A. K., Manikyamba, D., & Vasavi, N. J. (2016). COMPARATIVE STUDY OF DISEASE PATTERNS AND SCHOLASTIC PERFORMANCE AMONG RURAL, URBAN AND TRIBAL GOVERNMENT RESIDENTIAL HOSTEL CHILDREN OF EAST GODAVARI DISTRICT. *Journal of Evolution of Medical and Dental Sciences-Jemds, 5*(31), 1651-1655. doi:10.14260/jemds/2016/389 | B1 |
| 1. Sekiguchi, T., Hagiwara, Y., Momma, H., Tsuchiya, M., Kuroki, K., Kanazawa, K., . . . Nagatomi, R. (2018). Excessive game playing is associated with musculoskeletal pain among youth athletes: a cross-sectional study in Miyagi prefecture. *J Sports Sci, 36*(16), 1801-1807. doi:10.1080/02640414.2017.1420453 | B1 |
| 1. Sellschop, I., Myezwa, H., Mudzi, W., & Mbambo-Kekana, N. (2014). The effect of a computer-related ergonomic intervention program on learners in a school environment. *Work (Reading, Mass.)*. | B1 |
| 1. Sexson, S., & Madan-Swain, A. (1995). The chronically ill child in the school. *School Psychology Quarterly, 10*(4), 359-368. doi:10.1037/h0088311 | B1 |
| 1. Sexson, S. B., & Dingle, A. D. (1997). Medical problems that might present with academic difficulties. *Child and Adolescent Psychiatric Clinics of North America, 6*(3), 509-522. | B4 |
| 1. Sexson, S. B., & Madan-Swain, A. (1993). School reentry for the child with chronic illness. *Journal of Learning Disabilities, 26*(2), 115-125. doi:10.1177/002221949302600204 | B1 |
| 1. Shaheen, A., Nassar, O., Saleh, M., & Arabiat, D. (2014). Understanding of School Related Factors Associated with Emotional Health and Bullying Behavior among Jordanian Adolescents. *Iranian Journal of Public Health, 43*(11), 1528-1536. | B1 |
| 1. Shanbehzadeh, S., Salavati, M., Talebian, S., Khademi-Kalantari, K., & Tavahomi, M. (2018). Attention demands of postural control in non-specific chronic low back pain subjects with low and high pain-related anxiety. *Experimental Brain Research, 236*(7), 1927-1938. doi:10.1007/s00221-018-5267-6 | A2 |
| 1. Shand, B., Goicochea, M. T., Valenzuela, R., Fadic, R., Jensen, R., Tassorelli, C., & Nappi, G. (2015). Clinical and Demographical Characteristics of Patients with Medication Overuse Headache in Argentina and Chile: Analysis of the Latin American Section of COMOESTAS Project. *J Headache Pain, 16*, 83. doi:10.1186/s10194-015-0561-1 | A2 |
| 1. Shannon, R. A., Bergren, M. D., & Matthews, A. (2010). Frequent Visitors: Somatization in School-Age Children and Implications for School Nurses. *Journal of School Nursing, 26*(3), 169-182. | B1 |
| 1. Shao, Y. (1998). Quality of life of children with learning disorders. *Chinese Journal of Clinical Psychology, 6*(2), 104-105. | B5 |
| 1. Sharma, D., & Silbereisen, R. K. (2007). Revisiting an era in Germany from the perspective of adolescents in mother-headed single-parent families. *International Journal Of Psychology: Journal International De Psychologie, 42*(1), 46-58. doi:10.1080/00207590600663299 | B1 |
| 1. Sharma, P., Mehta, M., & Sagar, R. (2017). Efficacy of transdiagnostic cognitive-behavioral group therapy for anxiety disorders and headache in adolescents. *J Anxiety Disord, 46*, 78-84. doi:10.1016/j.janxdis.2016.11.001 | B1 |
| 1. Sheridan, D. C., & Meckler, G. D. (2016). Inpatient Pediatric Migraine Treatment: Does Choice of Abortive Therapy Affect Length of Stay? *J Pediatr, 179*, 211-215. doi:10.1016/j.jpeds.2016.08.050 | B1 |
| 1. Shek, D. T. L. (1994). Somatic symptoms in Chinese secondary school students in Hong Kong: Observations and service implications. *Therapeutic Care & Education, 3*(1), 27-38. | B1 |
| 1. Sheldon, M. R. (1994). LIFTING INSTRUCTION TO CHILDREN IN AN ELEMENTARY-SCHOOL. *Journal of Orthopaedic & Sports Physical Therapy, 19*(2), 105-110. | B1 |
| 1. Shenoy, S. R., & Brumback, R. A. (1997). Neurologic problems that might present with academic difficulties. *Child and Adolescent Psychiatric Clinics of North America, 6*(3), 523-543. | B1 |
| 1. Sherry, D. D., Brake, L., Tress, J. L., Sherker, J., Fash, K., Ferry, K., & Weiss, P. F. (2015). The Treatment of Juvenile Fibromyalgia with an Intensive Physical and Psychosocial Program. *J Pediatr, 167*(3), 731-737. doi:10.1016/j.jpeds.2015.06.036 | B1 |
| 1. Sherry, D. D., McGuire, T., Mellins, E., Salmonson, K., Wallace, C. A., & Nepom, B. (1991). Psychosomatic musculoskeletal pain in childhood: clinical and psychological analyses of 100 children. *Pediatrics, 88*(6), 1093-1099. | B3 |
| 1. Sherry, D. D., McGuire, T., Mellins, E., Salmonson, K., Wallace, C. A., & Nepom, B. (1991). Psychosomatic musculoskeletal pain in childhood: clinical and psychological analyses of 100 children. *Pediatrics, 88*(6), 1093-1099. | B3 |
| 1. Shivpuri, D., Rajesh, M. S., & Jain, D. (2003). Prevalence and characteristics of migraine among adolescents: a questionnaire survey. *Indian Pediatr, 40*(7), 665-669. | B1 |
| 1. Sibinga, E. M., Webb, L., Ghazarian, S. R., & Ellen, J. M. (2016). School-Based Mindfulness Instruction: An RCT. *Pediatrics, 137*(1). doi:10.1542/peds.2015-2532 | B1 |
| 1. Sijtsma, K., & Emons, W. H. M. (2011). Advice on total-score reliability issues in psychosomatic measurement. *Journal Of Psychosomatic Research, 70*(6), 565-572. doi:10.1016/j.jpsychores.2010.11.002 | B1 |
| 1. Silberstein, S., Winner, P. K., McAllister, P. J., Tepper, S. J., Halker, R., Mahmoud, R. A., & Siffert, J. (2017). Early Onset of Efficacy and Consistency of Response Across Multiple Migraine Attacks From the Randomized COMPASS Study: AVP-825 Breath Powered((R)) Exhalation Delivery System (Sumatriptan Nasal Powder) vs Oral Sumatriptan. *Headache, 57*(6), 862-876. doi:10.1111/head.13105 | A2 |
| 1. Silverstein, B., McKoy, E., Clauson, J., Perdue, L., & Raben, J. (1995). THE CORRELATION BETWEEN DEPRESSION AND HEADACHE - THE ROLE PLAYED BY GENERATIONAL CHANGES IN FEMALE ACHIEVEMENT. *Journal of Applied Social Psychology, 25*(1), 35-48. doi:10.1111/j.1559-1816.1995.tb01582.x | B1 |
| 1. Simon, C. B., Lentz, T. A., Bishop, M. D., Riley Iii, J. L., Fillingim, R. B., & George, S. Z. (2016). Comparative Associations of Working Memory and Pain Catastrophizing With Chronic Low Back Pain Intensity. *Physical Therapy, 96*(7), 1049-1056. doi:10.2522/ptj.20150335 | A2 |
| 1. Simons, L. E., & Basch, M. C. (2016). State of the art in biobehavioral approaches to the management of chronic pain in childhood. *Pain Manag, 6*(1), 49-61. doi:10.2217/pmt.15.59 | B2 |
| 1. Simons, L. E., Logan, D. E., Chastain, L., & Cerullo, M. (2010). Engagement in multidisciplinary interventions for pediatric chronic pain: parental expectations, barriers, and child outcomes. *Clinical Journal of Pain, 26*(4), 291-299. doi:10.1097/AJP.0b013e3181cf59fb | B3 |
| 1. Simons, L. E., Logan, D. E., Chastain, L., & Stein, M. (2010). The relation of social functioning to school impairment among adolescents with chronic pain. *Clinical Journal of Pain, 26*(1), 16-22. doi:10.1097/AJP.0b013e3181b511c2 | B1 |
| 1. Simons, L. E., Pielech, M., Cappucci, S., & Lebel, A. (2015). Fear of pain in pediatric headache. *Cephalalgia: An International Journal Of Headache, 35*(1), 36-44. doi:10.1177/0333102414534084 | B1 |
| 1. Singh, O. P., Mandal, N., Biswas, A., Mondal, S., Sen, S., & Mukhopadhyay, S. (2009). An investigation into a mass psychogenic illness at Burdwan, West Bengal. *55-57, 53*(1), 55-57. | B1 |
| 1. Skarstein, S., Rosvold, E. O., Helseth, S., Kvarme, L. G., Holager, T., Småstuen, M. C., & Lagerløv, P. (2014). High‐frequency use of over‐the‐counter analgesics among adolescents: Reflections of an emerging difficult life, a cross‐sectional study. *Scandinavian Journal of Caring Sciences, 28*(1), 49-56. doi:10.1111/scs.12039 | B1 |
| 1. Slifer, K. J., Ward, C. M., Amari, A., Bierenbaum, M., McLean, H., Pidcock, F., & Kost-Byerly, S. (2012). Interdisciplinary Behavioral Rehabilitation of Pediatric Pain-associated Disability. *15th World Congress of Pain Clinicians (Wspc 2012)*, 113-115. | B4 |
| 1. Smith, J., Eather, N., Morgan, P., Plotnikoff, R., Faigenbaum, A., & Lubans, D. (2014). The Health Benefits of Muscular Fitness for Children and Adolescents: A Systematic Review and Meta-Analysis. *Sports Medicine, 44*(9), 1209-1223. doi:10.1007/s40279-014-0196-4 | B1 |
| 1. Smith, M. S., Martin-Herz, S. P., Womack, W. M., & Marsigan, J. L. (2003). Comparative study of anxiety, depression, somatization, functional disability, and illness attribution in adolescents with chronic fatigue or migraine. *Pediatrics, 111*(4), e376-381. | B1 |
| 1. Smith, M. S., Martin-Herz, S. P., Womack, W. M., & McMahon, R. J. (1999). Recurrent headache in adolescents: nonreferred versus clinic population. *Headache, 39*(9), 616-624. | B1 |
| 1. Smyth, J. M., & Arigo, D. (2009). Recent evidence supports emotion-regulation interventions for improving health in at-risk and clinical populations. *Current Opinion in Psychiatry, 22*(2), 205-210. doi:10.1097/YCO.0b013e3283252d6d | B2 |
| 1. Sole, E., Tome-Pires, C., de la Vega, R., Racine, M., Castarlenas, E., Jensen, M. P., & Miro, J. (2016). Cognitive Fusion and Pain Experience in Young People. *Clin J Pain, 32*(7), 602-608. doi:10.1097/ajp.0000000000000227 | B1 |
| 1. Sood, E., Pinder, W., Pendley, J. S., Fisher, A. O., Wali, P. D., & del Rosario, F. (2016). Provider Communication Regarding Psychosocial Factors Predicts Pain Beliefs in Parent and Child. *J Dev Behav Pediatr, 37*(3), 205-212. doi:10.1097/dbp.0000000000000277 | B1 |
| 1. Sorberg, A., Allebeck, P., & Hemmingsson, T. (2014). IQ and somatic health in late adolescence. *Intelligence, 44*, 155-162. doi:10.1016/j.intell.2014.04.002 | A2 |
| 1. Sorensen, L. P., Stochkendahl, M. J., Hartvigsen, J., & Nilsson, N. G. (2006). Chiropractic patients in Denmark 2002: an expanded description and comparison with 1999 survey. *J Manipulative Physiol Ther, 29*(6), 419-424. doi:10.1016/j.jmpt.2006.06.001 | A2 |
| 1. Sourander, A., Aromaa, M., Pihlakoski, L., Haavisto, A., Rautava, P., Helenius, H., & Sillanpää, M. (2006). Early predictors of deliberate self-harm among adolescents. A prospective follow-up study from age 3 to age 15. *Journal Of Affective Disorders, 93*(1-3), 87-96. | B1 |
| 1. Souza, J. C., Souza, N., Arashiro, E. S. H., & Schaedler, R. (2007). Sonolência diurna excessiva em pré-vestibulandos. = Excessive daytime sleepiness in senior high school students. *Jornal Brasileiro de Psiquiatria, 56*(3), 184-187. doi:10.1590/S0047-20852007000300005 | B5 |
| 1. Spierings, E. L., & Schellekens, J. A. (1991). Causes of headache in high school students. *Headache Quarterly, 2*(3), 225-228. | B1 |
| 1. Sprague-McRae, J. M., & Rosenblum, R. K. (2013). Chronic Neurological Conditions In the Classroom: A School Nurse Curriculum For Sustaining a Healthy Learner. *Pediatric Nursing, 39*(6), 276-282. | B1 |
| 1. Spratling, R., & Weaver, S. R. (2012). Theoretical perspective: Resilience in medically fragile adolescents. *Research and Theory for Nursing Practice: An International Journal, 26*(1), 54-68. doi:10.1891/1541-6577.26.1.54 | B1 |
| 1. Sproul, J., MacCallum, J., & Ledger, S. (2017). Screens and teens with migraines: visually sensitive learners in contemporary digital classrooms. *Disability & Society, 32*(8), 1275-1279. doi:10.1080/09687599.2017.1330455 | B2 |
| 1. Staelin, R., Koneru, S. N., & Rawe, I. M. (2017). An over-the-counter central sensitization therapy: a chronic back pain registry study of pain relief, medication use and their adverse effects. *Pain Manag, 7*(2), 99-111. doi:10.2217/pmt-2016-0046 | A2 |
| 1. Stallard, P., Williams, L., Velleman, R., Lenton, S., & McGrath, P. J. (2002). Brief report: Behaviors identified by caregivers to detect pain in noncommunicating children. *Journal of Pediatric Psychology, 27*(2), 209-214. doi:10.1093/jpepsy/27.2.209 | B1 |
| 1. Stallknecht, S. E., Strandberg-Larsen, K., Hestbaek, L., & Andersen, A. N. (2017). Spinal pain and co-occurrence with stress and general well-being among young adolescents: a study within the Danish National Birth Cohort. *Eur J Pediatr, 176*(6), 807-814. doi:10.1007/s00431-017-2915-y | B1 |
| 1. Stein, M. T., Crow, J., Abbott, M., & Tanner, J. L. (2004). Organic or psychosomatic? Facilitating inquiry with children and parents (Reprinted from J Dev Behav. *Pediatrics, 114*(5), 1496-1500. doi:10.1542/peds.2004-1721T | B2 |
| 1. Stein, M. T., First, L. R., & Friedman, S. B. (1998). Twelve-year-old girl with chronic fatigue, school absence, and fluctuating somatic symptoms. *J Dev Behav Pediatr, 19*(3), 196-201. | B2 |
| 1. Stein, M. T., San Luis, N. B., & Sege, R. (2004). Bullying: concealed by behavioral and somatic symptoms. *Journal Of Developmental And Behavioral Pediatrics: JDBP, 25*(5), 347-351. | B2 |
| 1. Stein, K., Pearson, R. M., Stein, A., & Fazel, M. (2017). The predictive value of childhood recurrent abdominal pain for adult emotional disorders, and the influence of negative cognitive style. Findings from a cohort study. *PLoS One, 12*(9), e0185643. doi:10.1371/journal.pone.0185643 | B1 |
| 1. Stommen, N. C., Verbunt, J. A., & Goossens, M. E. (2016). Future goals of adolescents and young adults with chronic musculoskeletal pain. *Eur J Pain, 20*(4), 564-572. doi:10.1002/ejp.762 | B1 |
| 1. Stone, A. L., Walker, L. S., Laird, K. T., Shirkey, K. C., & Smith, C. A. (2016). Pediatric Pain Beliefs Questionnaire: Psychometric Properties of the Short Form. *J Pain, 17*(9), 1036-1044. doi:10.1016/j.jpain.2016.06.006 | B1 |
| 1. Stosic, L., Milutinovic, S., Lazarevic, K., Blagojevic, L., & Tadic, L. (2012). Household environmental tobacco smoke and respiratory diseases among children in Nis (Serbia). *Cent Eur J Public Health, 20*(1), 29-32. | B1 |
| 1. Stowell, J. R., Tumminaro, T., & Attarwala, M. (2008). Moderating effects of coping on the relationship between test anxiety and negative mood. *Stress & Health: Journal of the International Society for the Investigation of Stress, 24*(4), 313-321. | A2 |
| 1. Stranjalis, G., Tsamandouraki, K., Sakas, D. E., & Alamanos, Y. (2004). Low back pain in a representative sample of Greek population: analysis according to personal and socioeconomic characteristics. *Spine (Phila Pa 1976), 29*(12), 1355-1360; discussion 1361. | A2 |
| 1. Strine, T. W., Okoro, C. A., McGuire, L. C., & Balluz, L. S. The Associations Among Childhood Headaches, Emotional and Behavioral Difficulties, and Health Care Use. *Pediatrics, 117*(5), 1728-1735. doi:10.1542/peds.205-1024 | B1 |
| 1. Sturgeon, J. A., Carriere, J. S., Kao, M. J., Rico, T., Darnall, B. D., & Mackey, S. C. (2016). Social Disruption Mediates the Relationship Between Perceived Injustice and Anger in Chronic Pain: a Collaborative Health Outcomes Information Registry Study. *Ann Behav Med, 50*(6), 802-812. doi:10.1007/s12160-016-9808-6 | A2 |
| 1. Suarez-Lopez, J. R., Himes, J. H., Jacobs, D. R., Jr., Alexander, B. H., & Gunnar, M. R. (2013). Acetylcholinesterase activity and neurodevelopment in boys and girls. *Pediatrics, 132*(6), e1649-e1658. doi:10.1542/peds.2013-0108 | B1 |
| 1. Sulová, L., & Fait, T. (2009). [Unwanted children]. *Ceská Gynekologie / Ceská Lékarská Spolecnost J. Ev. Purkyne, 74*(3), 228-233. | B5 |
| 1. Sultan, C., Gaspari, L., & Paris, F. (2012). Adolescent dysmenorrhea. *Endocrine Development, 22*, 171-180. doi:10.1159/000331775 | B1 |
| 1. Sun, Z.-k., Wang, J.-y., & Luo, F. (2014). Attentional bias towards pain-related information. *Chinese Journal of Clinical Psychology, 22*(5), 782-787. | B5 |
| 1. Sundelin, G. (2012). Implications for clinical physiotherapy and student learning. *Advances in Physiotherapy, 14*(1), 1-2. doi:10.3109/14038196.2012.662813 | B4 |
| 1. Swanson, K. R., & Kollar, L. M. (1996). Abdominal pain in an adolescent. *J Pediatr Health Care, 10*(5), 231-233. doi:10.1016/s0891-5245(96)90011-5 | A3 |
| 1. Suvitie, P. A., Hallamaa, M. K., Matomaki, J. M., Makinen, J. I., & Perheentupa, A. H. (2016). Prevalence of Pain Symptoms Suggestive of Endometriosis Among Finnish Adolescent Girls (TEENMAPS Study). *J Pediatr Adolesc Gynecol, 29*(2), 97-103. doi:10.1016/j.jpag.2015.07.001 | B1 |
| 1. Svedberg, P., Eriksson, M., & Boman, E. (2013). Associations between scores of psychosomatic health symptoms and health-related quality of life in children and adolescents. *Health And Quality Of Life Outcomes, 11*, 176-176. doi:10.1186/1477-7525-11-176 | B1 |
| 1. Swain, C. T. V., Bradshaw, E. J., Whyte, D. G., & Ekegren, C. L. (2017). Life history and point prevalence of low back pain in pre-professional and professional dancers. *Phys Ther Sport, 25*, 34-38. doi:10.1016/j.ptsp.2017.01.005 | B1 |
| 1. Sweeney, N. M., Tucker, J., Reynosa, B., & Glaser, D. (2006). Reducing hunger-associated symptoms: the midmorning nutrition break. *J Sch Nurs, 22*(1), 32-39. | B1 |
| 1. Symon, D. N. K., & Hockaday, J. M. (1992). Is there a place for 'abdominal migraine' as a separate entity in the IHS classification? *Cephalalgia, 12*(6), 345-348. doi:10.1111/j.1468-2982.1992.00345.x | B4 |
| 1. Szwec, G. (2012). À propos d'une psychothérapie mère-bébé (commentaire de l'article de Pascale Blayau). = Concerning a mother/baby psychotherapy (comments on the article by Pascale Blayau). *Revue Française de Psychosomatique, 41*, 101-106. doi:10.3917/rfps.041.0101 | B5 |
| 1. Szyjkowska, A., Bortkiewicz, A., Szymczak, W., & Makowiec-Dabrowska, T. (2005). [Subjective symptoms related to mobile phone use--a pilot study]. *Polski Merkuriusz Lekarski: Organ Polskiego Towarzystwa Lekarskiego, 19*(112), 529-532. | B5 |
| 1. Tachibana, S. (1990). [Mental disorders induced by experiences of being bullied]. *Seishin Shinkeigaku Zasshi = Psychiatria Et Neurologia Japonica, 92*(6), 321-342. | B5 |
| 1. Tadakawa, M., Takeda, T., Monma, Y., Koga, S., & Yaegashi, N. (2016). The prevalence and risk factors of school absenteeism due to premenstrual disorders in Japanese high school students—A school-based cross-sectional study. *BioPsychoSocial Medicine, 10*. doi:10.1186/s13030-016-0067-3 | B1 |
| 1. Taimela, S., Kujala, U. M., Salminen, J. J., & Viljanen, T. (1997). The prevalence of low back pain among children and adolescents: a nationwide, cohort-based questionnaire survey in Finland. *Spine, 22*(10), 1132-1136. | B1 |
| 1. Tamminen, T. M., Bredenberg, P., Escartin, T., Kaukonen, P., Puura, K., Rutanen, M., . . . Salmelin, R. (1991). Psychosomatic symptoms in preadolescent children. *Psychotherapy And Psychosomatics, 56*(1-2), 70-77. | B1 |
| 1. Tan, B. K., Burnett, A., Hallett, J., Ha, A., & Briggs, A. M. (2016). Back pain beliefs in adolescents and adults in Australasia: A cross-sectional pilot study of selected psychometric properties of paper-based and web-based questionnaires in two diverse countries. *J Back Musculoskelet Rehabil, 29*(3), 565-574. doi:10.3233/bmr-160658 | B1 |
| 1. Tanaka, H., Tamai, H., Terashima, S., Takenaka, Y., & Tanaka, T. (2000). Psychosocial factors affecting psychosomatic symptoms in Japanese schoolchildren. *Pediatrics International: Official Journal Of The Japan Pediatric Society, 42*(4), 354-358. | B1 |
| 1. Tanaka, H., Terashima, S., Borres, M. P., & Thulesius, O. (2012). Psychosomatic problems and countermeasures in Japanese children and adolescents. *Biopsychosocial Medicine, 6*, 6-6. doi:10.1186/1751-0759-6-6 | B1 |
| 1. Tanaka, Y., Ito, H., Takayanagi, N., Harada, S., Someki, F., Noda, W., . . . Tsujii, M. (2014). Predicting school adaptation using the nursery teacher's rating development scale for children (NDSC): A longitudinal follow-up study from nursery school to elementary school. *Japanese Journal of Developmental Psychology, 25*(1), 58-66. | B5 |
| 1. Tas, D., & Acar, H. V. (2014). Does acupuncture have a positive effect on school success in children? *Journal Of Traditional Chinese Medicine = Chung I Tsa Chih Ying Wen Pan / Sponsored By All-China Association Of Traditional Chinese Medicine, Academy Of Traditional Chinese Medicine, 34*(4), 450-454. | B1 |
| 1. Taylor, J. A. M., Clopton, P., Bosch, E., Miller, K. A., & Marcelis, S. (1995). Interpretation of abnormal lumbosacral spine radiographs. *Spine, 20*(10), 1147-1154. | A2 |
| 1. Teplin, S. W., LaRosa, A., & Moore, R. M. (2013). Journal article reviews. *Journal of Developmental and Behavioral Pediatrics, 34*(7), 637-644. | B4 |
| 1. Terluin, B. (1998). De Vierdimensionale Klachtenlijst (4DKL) in de huisartspraktijk: Psychodiagnostisch gereedschap. = The Four-Dimensional Symptom Questionnaire in general practice: A psychodiagnostic instrument. *Psycholoog, 33*(1), 18-24. | A2 |
| 1. Tham, S. W., Palermo, T. M., Holley, A. L., Zhou, C., Stubhaug, A., Furberg, A. S., & Nielsen, C. S. (2016). A population-based study of quantitative sensory testing in adolescents with and without chronic pain. *Pain, 157*(12), 2807-2815. doi:10.1097/j.pain.0000000000000716 | B1 |
| 1. Thorisdottir, A. S., Villadsen, A., LeBouthillier, D. M., Rask, C. U., Wright, K. D., Walker, J. R., . . . Asmundson, G. J. G. (2017). Measurement invariance across genders on the Childhood Illness Attitude Scales (CIAS). *Journal of Psychosomatic Research, 98*, 34-39. doi:10.1016/j.jpsychores.2017.05.006 | B1 |
| 1. Timpka, S., Petersson, I. F., & Englund, M. (2010). The grade in physical education in adolescence as predictor for musculoskeletal pain diagnoses three decades later. *Pain, 150*(3), 414-419. doi:10.1016/j.pain.2010.03.035 | A2 |
| 1. Titova, O. E., Hogenkamp, P. S., Jacobsson, J. A., Feldman, I., Schiöth, H. B., & Benedict, C. (2015). Associations of self-reported sleep disturbance and duration with academic failure in community-dwelling Swedish adolescents: Sleep and academic performance at school. *Sleep Medicine, 16*(1), 87-93. doi:10.1016/j.sleep.2014.09.004 | B1 |
| 1. Todd, J. A., Anderson, V., & Lawrence, J. A. (1996). Planning skills in head-injured adolescents and their peers. *Neuropsychological Rehabilitation, 6*(2), 81-99. doi:10.1080/713755500 | A4 |
| 1. Toldo, I., Rattin, M., Perissinotto, E., De Carlo, D., Bolzonella, B., Nosadini, M., . . . Battistella, P. A. (2017). Survey on treatments for primary headaches in 13 specialized juvenile Headache Centers: The first multicenter Italian study. *Eur J Paediatr Neurol, 21*(3), 507-521. doi:10.1016/j.ejpn.2016.12.009 | B1 |
| 1. Tomoda, A. (2007). [School phobia and childhood chronic fatigue syndrome (CCFS)]. *Nihon Rinsho. Japanese Journal Of Clinical Medicine, 65*(6), 1121-1133. | B5 |
| 1. Tomoda, A., Miike, T., Honda, T., Fukuda, K., Kai, Y., Nabeshima, M., & Takahashi, M. (1995). SINGLE-PHOTON EMISSION COMPUTED-TOMOGRAPHY FOR CEREBRAL BLOOD-FLOW IN SCHOOL PHOBIA. *Current Therapeutic Research-Clinical and Experimental, 56*(10), 1088-1093. doi:10.1016/0011-393x(95)85116-x | B1 |
| 1. Torsheim, T., Aaroe, L. E., & Wold, B. (2001). Sense of coherence and school-related stress as predictors of subjective health complaints in early adolescence: Interactive, indirect or direct relationships? *Social Science & Medicine, 53*(5), 603-614. doi:10.1016/S0277-9536(00)00370-1 | B1 |
| 1. Torsheim, T., & Wold, B. (2001). School-related stress, school support, and somatic complaints: A general population study. *Journal of Adolescent Research, 16*(3), 293-303. doi:10.1177/0743558401163003 | B1 |
| 1. Torsheim, T., & Wold, B. (2001). School-related stress, support, and subjective health complaints among early adolescents: a multilevel approach. *Journal of Adolescence, 24*(6), 701-713. doi:10.1006/jado.2001.0440 | B1 |
| 1. Tran, S. T., Guite, J. W., Pantaleao, A., Pfeiffer, M., Myer, G. D., Sil, S., . . . Kashikar-Zuck, S. (2017). Preliminary Outcomes of a Cross-Site Cognitive-Behavioral and Neuromuscular Integrative Training Intervention for Juvenile Fibromyalgia. *Arthritis Care Res (Hoboken), 69*(3), 413-420. doi:10.1002/acr.22946 | B1 |
| 1. Tran, S. T., Thomas, S., DiCesare, C., Pfeiffer, M., Sil, S., Ting, T. V., . . . Kashikar-Zuck, S. (2016). A pilot study of biomechanical assessment before and after an integrative training program for adolescents with juvenile fibromyalgia. *Pediatr Rheumatol Online J, 14*(1), 43. doi:10.1186/s12969-016-0103-7 | A3 |
| 1. Trauzettel-Klosinski, S. (1997). [Examination strategies in simulation and functional vision disorders]. *Klinische Monatsblatter Fur Augenheilkunde, 211*(2), 73-83. | B5 |
| 1. Travagin, G., Margola, D., & Revenson, T. A. (2015). How effective are expressive writing interventions for adolescents? A meta-analytic review. *Clinical Psychology Review, 36*, 42-55. doi:10.1016/j.cpr.2015.01.003 | B1 |
| 1. Trevelyan, F. C., & Legg, S. J. Back pain in school children—Where to from here? *Applied Ergonomics, 37*(1), 45-54. doi:10.1016/j.apergo.2004.02.008 | B2 |
| 1. Trigueiro, M. J., Massada, L., & Garganta, R. (2013). Back pain in Portuguese schoolchildren: Prevalence and risk factors. *European Journal of Public Health, 23*(3), 499-503. doi:10.1093/eurpub/cks105 | B1 |
| 1. Tripathi, I., & Agarwal, A. (2000). Chronic illness, symptoms and efficacy in children as related to some psychological characteristics of mothers. *Psychology and Developing Societies, 12*(1), 31-42. doi:10.1177/097133360001200103 | B1 |
| 1. Tsay, A. J., & Giummarra, M. J. (2016). Position Sense in Chronic Pain: Separating Peripheral and Central Mechanisms in Proprioception in Unilateral Limb Pain. *J Pain, 17*(7), 815-823. doi:10.1016/j.jpain.2016.03.005 | A2 |
| 1. Tsujimoto, T., Daimon, K., Izumi, K., Sawai, M., & Iwashige, T. (2007). [School-refusal and social-withdrawal in the clinical setting at a psychiatric medical institution]. *Seishin Shinkeigaku Zasshi = Psychiatria Et Neurologia Japonica, 109*(4), 313-320. | B5 |
| 1. Turan, S., Konan, A., Kılıç, Y. A., Özvarış, Ş. B., & Sayek, I. (2012). The effect of problem-based learning with cooperative-learning strategies in surgery clerkships. *Journal Of Surgical Education, 69*(2), 226-230. doi:10.1016/j.jsurg.2011.07.010 | A2 |
| 1. Turunen, M., Toyinbo, O., Putus, T., Nevalainen, A., Shaughnessy, R., & Haverinen-Shaughnessy, U. (2014). Indoor environmental quality in school buildings, and the health and wellbeing of students. *International Journal Of Hygiene And Environmental Health, 217*(7), 733-739. doi:10.1016/j.ijheh.2014.03.002 | B1 |
| 1. Tyrrell, M. (2005). School phobia. *Journal of School Nursing (Allen Press Publishing Services Inc.), 21*(3), 147-151. doi:10.1177/10598405050210030401 | B1 |
| 1. Ulrich, V., Russell, M. B., Jensen, R., & Olesen, J. (1996). A comparison of tension-type headache in migraineurs and in non-migraineurs: a population-based study. *Pain, 67*(2-3), 501-506. | A2 |
| 1. Unalp, A., Dirik, E., & Kurul, S. (2006). Prevalence and characteristics of recurrent headaches in Turkish adolescents. *Pediatric Neurology, 34*(2), 110-115. | B1 |
| 1. Unalp, A., Dirik, E., & Kurul, S. (2007). Prevalence and clinical findings of migraine and tension-type headache in adolescents. *Pediatrics International: Official Journal Of The Japan Pediatric Society, 49*(6), 943-949. | B1 |
| 1. Waaler, P. E., Pedersen, S. J., & Sommerfelt, K. (1991). [Child neurology in a regional hospital]. *Tidsskrift For Den Norske Lægeforening: Tidsskrift For Praktisk Medicin, Ny Række, 111*(10), 1226-1229. | B5 |
| 1. Wahlberg, T., & Ireland, D. (2005). Can Replicating Primary Reflex Movements Improve Reading Ability? *Optometry and Vision Development, 36*(2), 89-91. | B1 |
| 1. Wahlstrom, K. L., & Begalle, M. S. (1999). More than test scores: results of the Universal School Breakfast Pilot in Minnesota. *Topics in Clinical Nutrition, 15*(1), 17-29. | B1 |
| 1. Waldie, K. E., Hausmann, M., Milne, B. J., & Poulton, R. (2002). Migraine and cognitive function: a life-course study. *Neurology, 59*(6), 904-908. | A2 |
| 1. Valdivia-Salas, S., Martín-Albo, J., Zaldivar, P., Lombas, A. S., & Jiménez, T. I. (2017). Spanish validation of the Avoidance and Fusion Questionnaire for Youth (AFQ-Y). *Assessment, 24*(7), 919-931. doi:10.1177/1073191116632338 | B1 |
| 1. Waligora, K. (2002). [Influence of social support by parents and peers on physical complaints in students]. *Praxis Der Kinderpsychologie Und Kinderpsychiatrie, 51*(3), 178-193. | B5 |
| 1. Valikhani, M., Ibrahim, R., & Dolah, M. S. (2016). THE INFLUENCES OF FURNITURE ON CHILDREN'S HEALTH AND WELL-BEING AT PRIMARY SCHOOOL. *Jurnal Teknologi, 78*(5), 245-252. | B4 |
| 1. Walker, L. S. (2004). Helping the child with recurrent abdominal pain return to school. *Pediatric Annals, 33*(2), 128-136. | B1 |
| 1. Walker, L. S., Claar, R. L., & Garber, J. (2002). Social consequences of children's pain: when do they encourage symptom maintenance? *Journal Of Pediatric Psychology, 27*(8), 689-698. | B3 |
| 1. Walker, L. S., Garber, J., & Greene, J. W. (1994). SOMATIC COMPLAINTS IN PEDIATRIC-PATIENTS - A PROSPECTIVE-STUDY OF THE ROLE OF NEGATIVE LIFE EVENTS, CHILD SOCIAL AND ACADEMIC COMPETENCE, AND PARENTAL SOMATIC SYMPTOMS. *Journal of Consulting and Clinical Psychology, 62*(6), 1213-1221. doi:10.1037//0022-006x.62.6.1213 | B3 |
| 1. Walker, L. S., Garber, J., Van Slyke, D. A., & Greene, J. W. (1995). Long-term health outcomes in patients with recurrent abdominal pain. *Journal Of Pediatric Psychology, 20*(2), 233-245. | B1 |
| 1. Walker, L. S., Guite, J. W., Duke, M., Barnard, J. A., & Greene, J. W. (1998). Recurrent abdominal pain: a potential precursor of irritable bowel syndrome in adolescents and young adults. *J Pediatr, 132*(6), 1010-1015. | A2 |
| 1. Wallenius, M., Rimpela, A., Punamaki, R. L., & Lintonen, T. (2009). Digital game playing motives among adolescents: Relations to parent-child communication, school performance, sleeping habits, and perceived health. *Journal of Applied Developmental Psychology, 30*(4), 463-474. doi:10.1016/j.appdev.2008.12.021 | B1 |
| 1. Walsemann, K. M., Bell, B. A., & Maitra, D. (2011). The intersection of school racial composition and student race/ethnicity on adolescent depressive and somatic symptoms. *Social Science & Medicine, 72*(11), 1873-1883. doi:10.1016/j.socscimed.2011.03.033 | B1 |
| 1. van der Wouden, J. C., van der Pas, P., Bruijnzeels, M. A., Brienen, J. A., & van Suijlekom-Smit, L. W. (1999). Headache in children in Dutch general practice. *Cephalalgia: An International Journal Of Headache, 19*(3), 147-150. | B1 |
| 1. van der Meer, H. A., Speksnijder, C. M., Engelbert, R. H. H., Lobbezoo, F., Nijhuis-van der Sanden, M. W. G., & Visscher, C. M. (2017). The Association Between Headaches and Temporomandibular Disorders is Confounded by Bruxism and Somatic Symptoms. *Clin J Pain, 33*(9), 835-843. doi:10.1097/ajp.0000000000000470 | A2 |
| 1. van Tilburg, M. A., Chitkara, D. K., Palsson, O. S., Turner, M., Blois-Martin, N., Ulshen, M., & Whitehead, W. E. (2009). Audio-recorded guided imagery treatment reduces functional abdominal pain in children: a pilot study. *Pediatrics, 124*(5), e890-897. doi:10.1542/peds.2009-0028 | B1 |
| 1. Vancleef, L. M., Hanssen, M. M., & Peters, M. L. (2016). Are individual levels of pain anxiety related to negative interpretation bias? An examination using an ambiguous word priming task. *Eur J Pain, 20*(5), 833-844. doi:10.1002/ejp.809 | A2 |
| 1. Wand, B. M., Catley, M. J., Rabey, M. I., O'Sullivan, P. B., O'Connell, N. E., & Smith, A. J. (2016). Disrupted Self-Perception in People With Chronic Low Back Pain. Further Evaluation of the Fremantle Back Awareness Questionnaire. *J Pain, 17*(9), 1001-1012. doi:10.1016/j.jpain.2016.06.003 | A2 |
| 1. Wang, C., Lin, J., & Gan, N. (2002). Clinical diagnosis and personality of children admitted to hospital for school attendance refusal. *Chinese Mental Health Journal, 16*(6), 411-413. | B5 |
| 1. Vannatta, K., Getzoff, E. A., Gilman, D. K., Noll, R. B., Gerhardt, C. A., Powers, S. W., & Hershey, A. D. (2008). Friendships and social interactions of school-aged children with migraine. *Cephalalgia, 28*(7), 734-743. doi:10.1111/j.1468-2982.2008.01583.x | B1 |
| 1. Vargas, S., & Lucker, J. R. (2016). A Quantitative Summary of The Listening Program (TLP) Efficacy Studies: What Areas Were Found to Improve by TLP Intervention? *Occup Ther Int, 23*(2), 206-217. doi:10.1002/oti.1425 | B2 |
| 1. Warshaw, L. J., Lipton, R. B., & Silberstein, S. D. (1998). Migraine: a "woman's disease?". *Women & Health, 28*(2), 79-99. | B1 |
| 1. Vega-Dienstmaier, J. M., Salinas-Piélago, J. E., Gutiérrez-Campos, M. d. R., Mandamiento-Ayquipa, R. D., Yara-Hokama, M. d. C., Ponce-Canchihuamán, J., & Castro-Morales, J. (2006). Lead levels and cognitive abilities in Peruvian children. *Revista Brasileira de Psiquiatria, 28*(1), 33-39. doi:10.1590/S1516-44462006000100008 | B1 |
| 1. Weiss, K. E., Harbeck-Weber, C., Zaccariello, M. J., Kimondo, J. N., Harrison, T. E., & Bruce, B. K. (2018). Executive functioning in pediatric chronic pain: Do deficits exist? *Pain Medicine, 19*(1), 60-67. doi:10.1093/pm/pnx020 | B1 |
| 1. Weiss, K. E., Hahn, A., Wallace, D. P., Biggs, B., Bruce, B. K., & Harrison, T. E. (2013). Acceptance of Pain: Associations With Depression, Catastrophizing, and Functional Disability Among Children and Adolescents in an Interdisciplinary Chronic Pain Rehabilitation Program. *Journal Of Pediatric Psychology, 38*(7), 756-765. doi:10.1093/jpepsy/jst028 | B1 |
| 1. Weizman, Z., Abu-Abed, J., & Binsztok, M. (2016). Lactobacillus reuteri DSM 17938 for the Management of Functional Abdominal Pain in Childhood: A Randomized, Double-Blind, Placebo-Controlled Trial. *Journal of Pediatrics, 174*, 160-164.e161. doi:10.1016/j.jpeds.2016.04.003 | B1 |
| 1. Welch, T. R. (2011). School absenteeism and functional somatic symptoms. *The Journal Of Pediatrics, 159*(6), A3-A3. doi:10.1016/j.jpeds.2011.10.021 | B4 |
| 1. Veldhuijzen, D. S., Kenemans, J. L., van Wijck, A. J. M., Olivier, B., Kalkman, C., & Volkerts, E. R. (2006). Processing capacity in chronic pain patients: A visual event-related potentials study. *Pain, 121*(1-2), 60-68. doi:10.1016/j.pain.2005.12.004 | A2 |
| 1. Wells, R., McCann, J., Adams, J., Voris, J., & Dahl, B. (1997). A validational study of the Structured Interview of Symptoms Associated with Sexual Abuse (SASA) using three samples of sexually abused, allegedly abused, and nonabused boys. *Child Abuse & Neglect, 21*(12), 1159-1167. | A3 |
| 1. Verhoeven, C., & Van Staveren, A. (2004). An Automated Grade Prediction System. *European Journal of Engineering Education, 29*(2), 251-258. | B1 |
| 1. Vervorck, A. (2011). Small remedies. *Homoeopathic Heritage, 37*(3), 18-20. | B2 |
| 1. Westendorp, T., Verbunt, J. A., Remerie, S. C., de Blecourt, A. C., van Baalen, B., & Smeets, R. J. (2016). Social functioning in adulthood: Understanding long-term outcomes of adolescents with chronic pain/fatigue treated at inpatient rehabilitation programs. *Eur J Pain, 20*(7), 1121-1130. doi:10.1002/ejp.836 | B3 |
| 1. Wettenschwiler, P. D., Lorenzetti, S., Stampfli, R., Rossi, R. M., Ferguson, S. J., & Annaheim, S. (2015). Mechanical Predictors of Discomfort during Load Carriage. *PLoS One, 10*(11), e0142004. doi:10.1371/journal.pone.0142004 | A2 |
| 1. Vetter, T. R. (2008). A clinical profile of a cohort of patients referred to an anesthesiology-based pediatric chronic pain medicine program. *Anesthesia And Analgesia, 106*(3), 786. doi:10.1213/ane.0b013e3181609483 | B1 |
| 1. Viana, M., Linde, M., Sances, G., Ghiotto, N., Guaschino, E., Allena, M., . . . Tassorelli, C. (2016). Migraine aura symptoms: Duration, succession and temporal relationship to headache. *Cephalalgia, 36*(5), 413-421. doi:10.1177/0333102415593089 | A2 |
| 1. Viana, M., Sances, G., Linde, M., Ghiotto, N., Guaschino, E., Allena, M., . . . Tassorelli, C. (2017). Clinical features of migraine aura: Results from a prospective diary-aided study. *Cephalalgia, 37*(10), 979-989. doi:10.1177/0333102416657147 | B1 |
| 1. Wicksell, R. K., Melin, L., & Olsson, G. L. (2007). Exposure and acceptance in the rehabilitation of adolescents with idiopathic chronic pain - a pilot study. *European Journal Of Pain (London, England), 11*(3), 267-274. | B1 |
| 1. Victoir, A., Bernaerts, I., & Van den Bergh, O. (2001). Leerproblemen en gezondheidsklachten in stresstheoretisch perspectief. = Learning problems and psychosomatic complaints: A stress theoretical perspective. *Gedrag & Gezondheid: Tijdschrift voor Psychologie en Gezondheid, 29*(3), 159-171. | B5 |
| 1. Wiendels, N. J., van der Geest, M. C. M., Neven, A. K., Ferrari, M. D., & Laan, L. A. E. (2005). Chronic daily headache in children and adolescents. *Headache: The Journal of Head & Face Pain, 45*(6), 678-683. | B1 |
| 1. Vieno, A., Lenzi, M., Santinello, M., & Scacchi, L. (2013). Sense of Community, Unfairness, and Psychosomatic Symptoms: A Multilevel Analysis of Italian Schools. *Journal of Adolescent Health, 53*(1), 142-145. doi:10.1016/j.jadohealth.2013.02.019 | B1 |
| 1. Wiklund, M., Malmgren-Olsson, E. B., Ohman, A., Bergstrom, E., & Fjellman-Wiklund, A. (2012). Subjective health complaints in older adolescents are related to perceived stress, anxiety and gender - a cross-sectional school study in Northern Sweden. *BMC Public Health, 12*, 993. doi:10.1186/1471-2458-12-993 | B1 |
| 1. Williams, R., Leone, L., Faedda, N., Natalucci, G., Bellini, B., Salvi, E., . . . Guidetti, V. (2017). The role of attachment insecurity in the emergence of anxiety symptoms in children and adolescents with migraine: an empirical study. *J Headache Pain, 18*(1), 62. doi:10.1186/s10194-017-0769-3 | B1 |
| 1. Visudtibhan, A., Boonsopa, C., Thampratankul, L., Nuntnarumit, P., Okaschareon, C., Khongkhatithum, C., . . . Visudhiphan, P. (2010). Headache in junior high school students: types & characteristics in Thai children. *Journal Of The Medical Association Of Thailand = Chotmaihet Thangphaet, 93*(5), 550-557. | B1 |
| 1. Vitulano, L. A. (2003). Psychosocial issues for children and adolescents with chronic illness: self-esteem, school functioning and sports participation. *Child and Adolescent Psychiatric Clinics of North America, 12*(3), 585-592. doi:10.1016/S1056-4993(03)00027-0 | B1 |
| 1. Wober, C., Wober-Bingol, C., Uluduz, D., Aslan, T. S., Uygunoglu, U., Tufekci, A., . . . Steiner, T. J. (2018). Undifferentiated headache: broadening the approach to headache in children and adolescents, with supporting evidence from a nationwide school-based cross-sectional survey in Turkey. *J Headache Pain, 19*(1), 18. doi:10.1186/s10194-018-0847-1 | B1 |
| 1. Voerman, J. S., de Klerk, C., Heyden, K. M. V., Passchier, J., Idema, W., Timman, R., & Jolles, J. (2017). Pain is Associated With Poorer Grades, Reduced Emotional Well-Being, and Attention Problems in Adolescents. *Clinical Journal of Pain, 33*(1), 44-50. doi:10.1097/ajp.0000000000000367 | B1 |
| 1. Voerman, J. S., Remerie, S., Westendorp, T., Timman, R., Busschbach, J. J., Passchier, J., & de Klerk, C. (2015). Effects of a Guided Internet-Delivered Self-Help Intervention for Adolescents With Chronic Pain. *J Pain, 16*(11), 1115-1126. doi:10.1016/j.jpain.2015.07.011 | B1 |
| 1. Voita, D., Kaulina, A., & Valevica, E. (2013). Efficiency of non medical integrative methodology for children's with migraine and learning disorders. *Psychology & Health, 28*, 330-330. | B4 |
| 1. Wojtowicz, A. A., & Banez, G. A. (2014). Adolescents with chronic pain and associated functional disability: A descriptive analysis. *Journal Of Child Health Care: For Professionals Working With Children In The Hospital And Community*. | B4 |
| 1. Wolke, D., Woods, S., Bloomfield, L., & Karstadt, L. Bullying involvement in primary school and common health problems. *Archives of Disease in Childhood, 85*(3), 197-201. | B1 |
| 1. von Baeyer, C. L. (2011). Interpreting the high prevalence of pediatric chronic pain revealed in community surveys. *Pain, 152*(12), 2683-2684. doi:10.1016/j.pain.2011.08.023 | B4 |
| 1. Woodbury, M. M. (1993). Recurrent abdominal pain in child patients seen at a pediatric gastroenterology clinic. Observations of 50 children and their families. *Psychosomatics, 34*(6), 485-493. doi:10.1016/s0033-3182(93)71822-8 | B3 |
| 1. Woods, K., & Ostrowski-Delahanty, S. (2017). Psychometric Properties of the Psychosocial Assessment Tool-Chronic Pain Version in Families of Children With Headache. *J Child Neurol, 32*(8), 766-773. doi:10.1177/0883073817707111 | B1 |
| 1. Woolner, P., Hall, E., Higgins, S., McCaughey, C., & Wall, K. (2007). A sound foundation? What we know about the impact of environments on learning and the implications for Building Schools for the Future. *Oxford Review of Education, 33*(1), 47-70. doi:10.1080/03054980601094693 | B4 |
| 1. Vowles, K. E., Jordan, A., & Eccleston, C. (2010). Toward a taxonomy of adolescents with chronic pain: exploratory cluster and discriminant analyses of the bath adolescent pain questionnaire. *European Journal of Pain, 14*(2), 214-221. doi:10.1016/j.ejpain.2009.05.004 | B1 |
| 1. Wu, M. Y., Huang, M. C., Chiang, J. H., Sun, M. F., Lee, Y. C., & Yen, H. R. (2017). Acupuncture decreased the risk of coronary heart disease in patients with fibromyalgia in Taiwan: a nationwide matched cohort study. *Arthritis Res Ther, 19*(1), 37. doi:10.1186/s13075-017-1239-7 | A2 |
| 1. Wålinder, R., Gunnarsson, K., Runeson, R., & Smedje, G. (2007). Physiological and psychological stress reactions in relation to classroom noise. *Scand J Work Environ Health, 33*(4), 260-266. | B1 |
| 1. Wöber-Bingöl, Ç., Wöber, C., Uluduz, D., Uygunoğlu, U., Aslan, T. S., Kernmayer, M., . . . Steiner, T. J. (2014). The global burden of headache in children and adolescents—Developing a questionnaire and methodology for a global study. *The Journal of Headache and Pain, 15*. | B1 |
| 1. Yamazaki, T. (1998). Factors related to school refusal which prolong somatization in children. *Japanese Journal of Child and Adolescent Psychiatry, 39*(5), 420-432. | B5 |
| 1. Yang, J., Ma, H., & Sun, X. (2000). A comparative study on the mental health status of student cadres. *Chinese Journal of Clinical Psychology, 8*(2), 109-110. | B5 |
| 1. Yang, S. Y., Chen, M. D., Huang, Y. C., Lin, C. Y., & Chang, J. H. (2017). Association Between Smartphone Use and Musculoskeletal Discomfort in Adolescent Students. *J Community Health, 42*(3), 423-430. doi:10.1007/s10900-016-0271-x | B1 |
| 1. Yao, W. G., Luo, C. L., Ai, F. Z., & Chen, Q. (2012). Risk Factors for Nonspecific Low-Back Pain in Chinese Adolescents: A Case-Control Study. *Pain Medicine, 13*(5), 658-664. doi:10.1111/j.1526-4637.2012.01369.x | B1 |
| 1. Yeo, S. N., & Tay, K. H. (2009). Pain prevalence in Singapore. *Ann Acad Med Singapore, 38*(11), 937-942. | B1 |
| 1. Yıldız, M. A., & Duy, B. (2017). The predictive role of emotion regulation strategies on depressive and psychosomatic symptoms in adolescents. *Current Psychology: A Journal for Diverse Perspectives on Diverse Psychological Issues*. doi:10.1007/s12144-017-9616-6 | B1 |
| 1. Yokota, S., Kikuchi, M., & Miyamae, T. (2013). Juvenile fibromyalgia: Guidance for management. *Pediatrics International: Official Journal Of The Japan Pediatric Society, 55*(4), 403-409. doi:10.1111/ped.12155 | B1 |
| 1. Youssef, N. N., Rosh, J. R., Loughran, M., Schuckalo, S. G., Cotter, T. N., Verga, B. G., & Mones, R. L. (2004). Treatment of functional abdominal pain in childhood with cognitive behavioral strategies. *Journal of Pediatric Gastroenterology and Nutrition, 39*(2), 192-196. doi:10.1097/00005176-200408000-00013 | B1 |
| 1. Yuriko, T. (2001). Research on psychosomatic complaints by senior high school students in Tokyo and their related factors. *Psychiatry And Clinical Neurosciences, 55*(1), 3-11. doi:10.1046/j.1440-1819.2001.00777.x | B1 |
| 1. Zaharakis, N. M., Mason, M. J., Brown, A., Moore, M., Garcia, C., Foster, R., & Richards, S. (2018). Resiliency moderates the influence of somatization on externalizing problems. *Journal of Child and Family Studies*. doi:10.1007/s10826-018-1141-1 | B1 |
| 1. Zemel, L., & Blier, P. R. (2016). Juvenile Fibromyalgia: A Primary Pain, or Pain Processing, Disorder. *Semin Pediatr Neurol, 23*(3), 231-241. doi:10.1016/j.spen.2016.10.007 | B2 |
| 1. Zernikow, B., Wager, J., Hechler, T., Hasan, C., Rohr, U., Dobe, M., . . . Blankenburg, M. (2012). Characteristics of highly impaired children with severe chronic pain: a 5-year retrospective study on 2249 pediatric pain patients. *BMC Pediatr, 12*, 54. doi:10.1186/1471-2431-12-54 | B1 |
| 1. Zgorzalewicz, M., & Budzińska, M. (1999). [The quality of life of school children and adolescents with headaches]. *Neurologia I Neurochirurgia Polska, 33 Suppl 5*, 77-88. | B5 |
| 1. Zhang, N., Baker, H. W., Tufts, M., Raymond, R. E., Salihu, H., & Elliott, M. R. (2013). Early childhood lead exposure and academic achievement: Evidence from Detroit public schools, 2008-2010. *American Journal of Public Health, 103*(3), e72-e77. doi:10.2105/AJPH.2012.301164 | B1 |
| 1. Zhang, X., Zhao, Z. H., Nordquist, T., Larsson, L., Sebastian, A., & Norback, D. (2011). A longitudinal study of sick building syndrome among pupils in relation to microbial components in dust in schools in China. *Science of the Total Environment, 409*(24), 5253-5259. doi:10.1016/j.scitotenv.2011.08.059 | B1 |
| 1. Zhao, Z., Huang, T., Tang, C., Ni, K., Pan, X., Yan, C., . . . Luo, Y. (2017). Altered resting-state intra- and inter- network functional connectivity in patients with persistent somatoform pain disorder. *PLoS One, 12*(4), e0176494. doi:10.1371/journal.pone.0176494 | A2 |
| 1. Zheng, C. J., & Chen, J. (2015). Disc degeneration implies low back pain. *Theor Biol Med Model, 12*, 24. doi:10.1186/s12976-015-0020-3 | B1 |
| 1. Özen, Ş., & Güloğlu, C. (2003). İlaçla özkiyim girişiminde bulunan ergen ve gençlerde depresif belirti farkliliklari. = Depressive symptom differences between adolescents and youths suicide attempted with drugs. *Anadolu Psikiyatri Dergisi, 4*(3), 159-166. | B5 |

A1: Not human population; A2: Not School age; A3: Not a community based or
 clinical pain population; A4: Study targeting a specific diagnosis, other
 than recurrent pain; B1: Not assessing the association between
 recurrent pain and academic
 achievement; B2: Not observational or interventions study; B3: No comparison group without recurrent
 pain or academic difficulties; B4: Not a primary study or a correction
 to an included study; B5: Not published in Swedish or English; B6: Not published between 1990-2018
